# Supplementary material for: Global, regional, and national burdens of traumatic brain injury in adolescents and young adults aged 10-24 years from 1990 to 2021: A secondary analysis of the Global Burden of Disease Study 2021
Source: Research Square preprint supplement (doi:10.21203/rs.3.rs-7613312/v1), 2025-11-26
Supplement: Supplementary file 1 [file 5210013950ec52ebb9b44df8.docx]

**Supplementary materials:**

**Figure S1.** The proportion of years lived with disability (YLDs) cases of Traumatic brain injury (TBI) due to each cause from 1990 to 2021.

**Figure S2.** The proportion of prevalence cases of Traumatic brain injury (TBI) due to each cause from 1990 to 2021, stratified by age group and sex.

**Figure S3.** The proportion of years lived with disability (YLDs) cases of Traumatic brain injury (TBI) due to each cause from 1990 to 2021, stratified by age group and sex.

**Table S1.** The prevalence and YLDs of Traumatic brain injury (TBI), and their temporal trends from 1990 to 2021 in the adolescents and young adults of 10-24 years old in 204 countries and territories.

**Table S2.** Global age-specific prevalence, and YLDs rate of TBI in both sexes, females, and males from 1990 to 2021.

**Table S3.** Global age-specific prevalence, and YLDs number of TBI in both sexes, females, and males from 1990 to 2021.

**Table S4.** Global proportion of prevalence number of Traumatic brain injury (TBI) due to each cause from 1990 to 2021.

**Figure S1. The proportion of years lived with disability (YLDs) cases of Traumatic brain injury (TBI) due to each cause from 1990 to 2021**


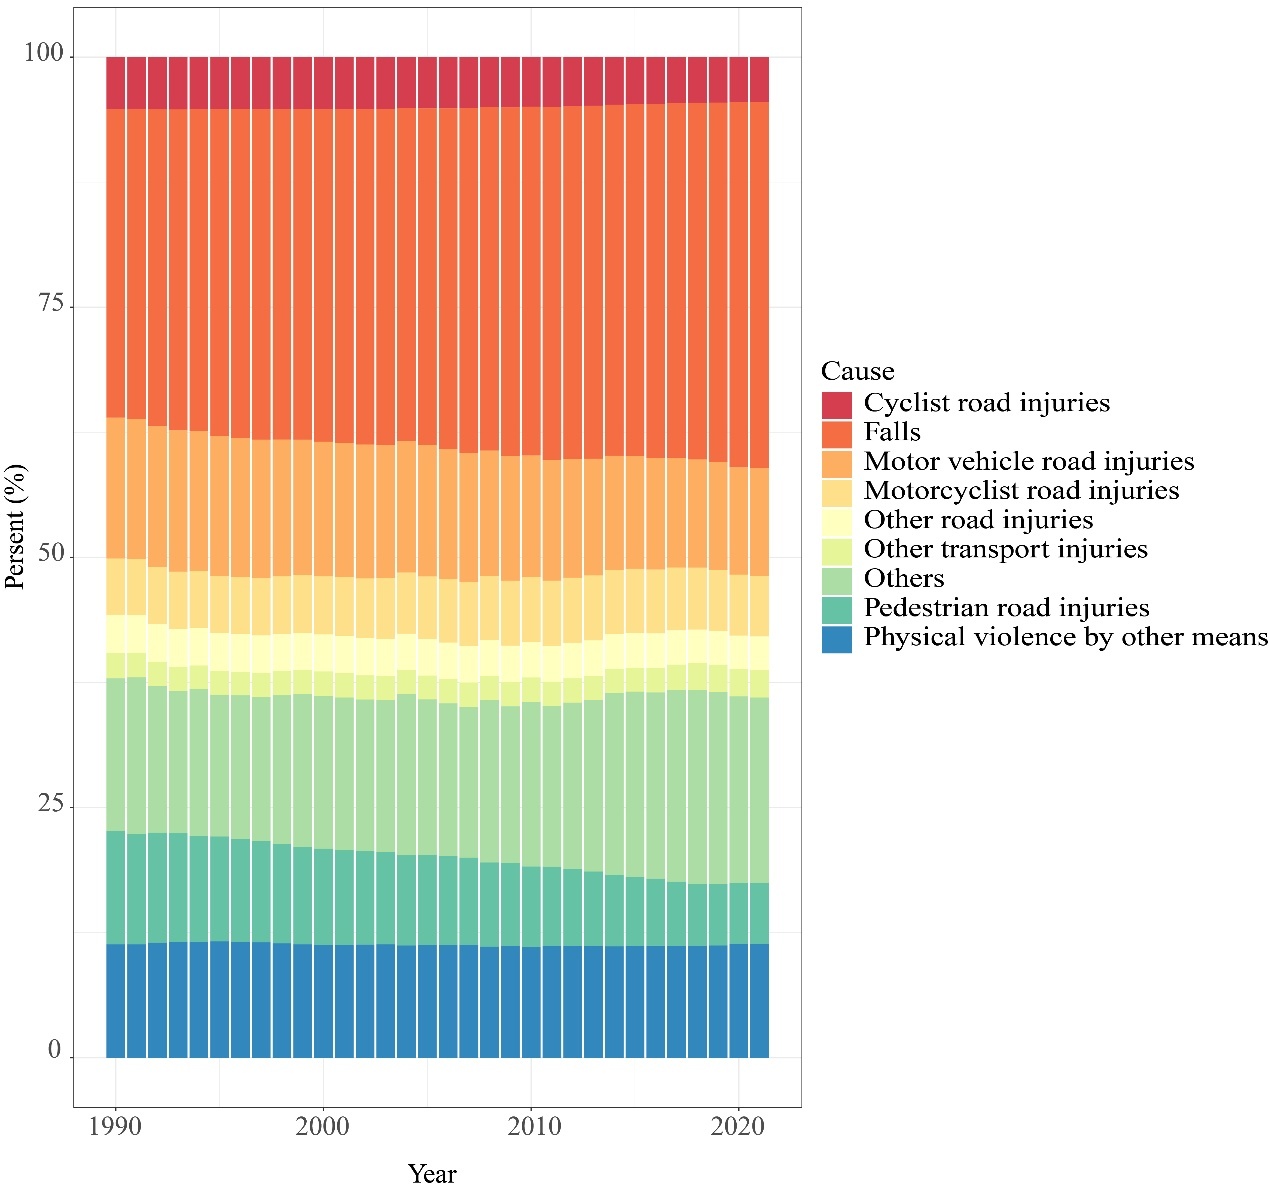


**Figure S2. The proportion of prevalence cases of Traumatic brain injury (TBI) due to each cause from 1990 to 2021, stratified by age group and sex**


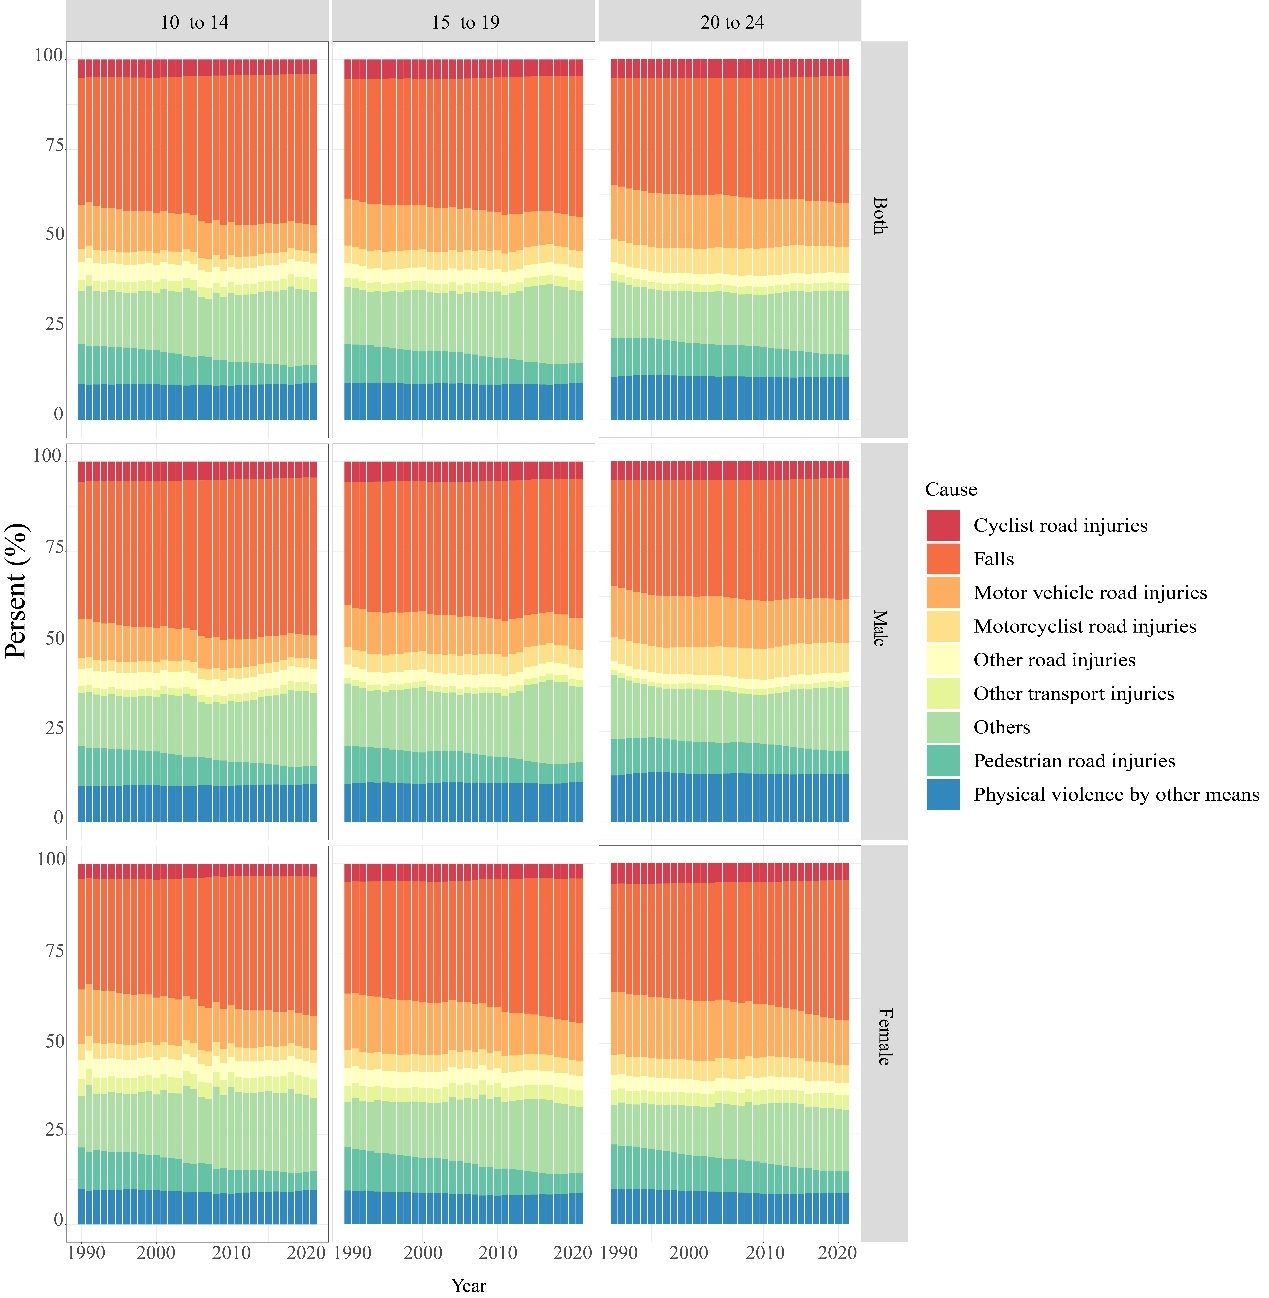


**Figure S3. The proportion of years lived with disability (YLDs) cases of Traumatic brain injury (TBI) due to each cause from 1990 to 2021, stratified by age group and sex**


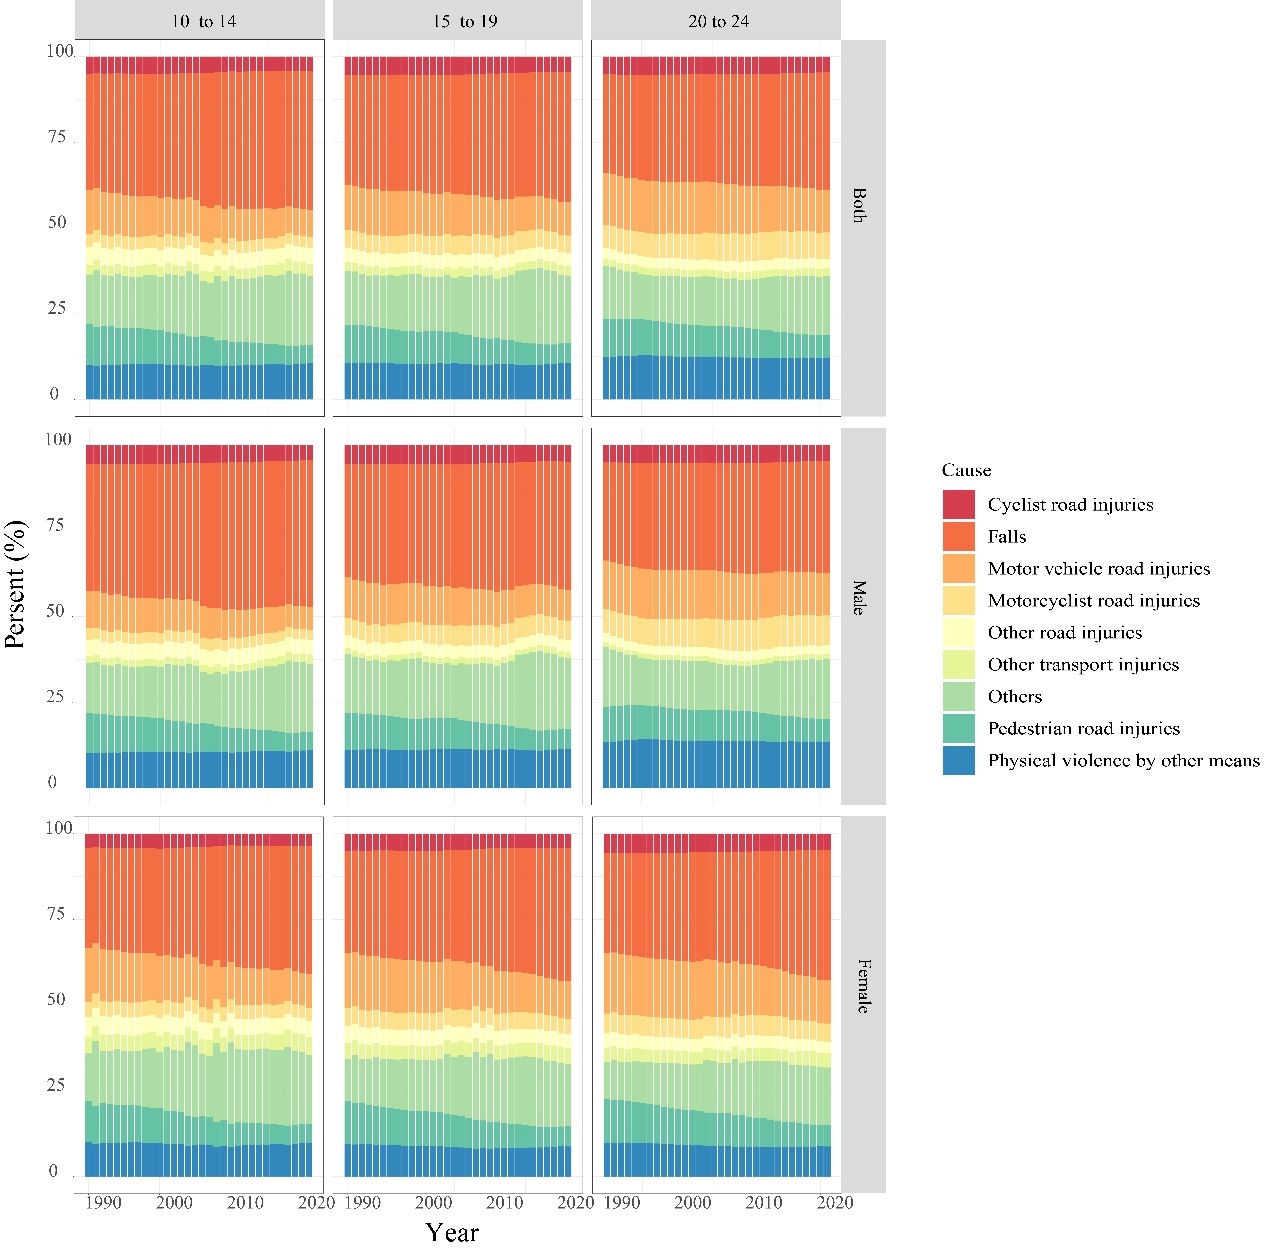


**Table S1. The prevalence and YLDs of Traumatic brain injury (TBI), and their temporal trends from 1990 to 2021 in the adolescents and young adults of 10-24 years old in 204 countries and territories**

| Location | Prevalence | | | | | | YLDs | | | | | |
| --- | --- | --- | --- | --- | --- | --- | --- | --- | --- | --- | --- | --- |
|  | Cases(n),1990 | Prevalence  (per100,000  population), 1990 | Cases(n),2021 | Prevalence  (per100,000  population), 2021 | AAPC, 1990–2021 | p value | Cases(n),1990 | YLDs  (per100,000  population), 1990 | Cases(n),2021 | YLDs  (per100,000  population), 2021 | AAPC, 1990–2021 | p value |
| Afghanistan | 27442.7(11217.2-65873.3) | 812.6(332.1-1950.5) | 49715.6(34986-70192) | 466.8(328.5-659.1) | -1.81  (-2 to -1.56) | p<0.001 | 4017.4(1626.7-8890) | 119(48.2-263.2) | 7603.4(5258.5-10621) | 71.4(49.4-99.7) | -1.69 (-1.89 to -1.43) | p<0.001 |
| Albania | 3874(3530-4233.5) | 395.5(360.4-432.2) | 1786.1(1635.3-1961.3) | 338(309.4-371.1) | -0.53 (-0.71 to -0.35) | p<0.001 | 585.6(384.7-798.8) | 59.8(39.3-81.6) | 270.4(182.2-381.4) | 51.2(34.5-72.2) | -0.53 (-0.71 to -0.36) | p<0.001 |
| Algeria | 25116.2(23433.1-26926.6) | 295(275.3-316.3) | 16812.9(15725.8-18193.5) | 165.4(154.7-179) | -1.84 (-1.89 to -1.79) | p<0.001 | 3908.1(2662.2-5570.8) | 45.9(31.3-65.4) | 2597.9(1803.1-3623.3) | 25.6(17.7-35.6) | -1.87 (-1.93 to -1.79) | p<0.001 |
| American Samoa | 15(13.9-16.4) | 100(92.7-108.9) | 17.1(14-21.6) | 123.1(100.5-155.4) | 0.57 (0.07 to 1.15) | 0.034 | 2.3(1.5-3.3) | 15.5(10.2-22.2) | 2.6(1.9-3.6) | 18.9(13.3-25.8) | 0.69 (0.12 to 1.21) | 0.038 |
| Andorra | 26.1(23.4-29.6) | 215(192.2-243.4) | 23.5(20.8-26.9) | 180.5(159.4-206.3) | -0.57 (-0.61 to -0.53) | p<0.001 | 3.5(2.4-5) | 29(19.4-41.3) | 3.2(2.1-4.6) | 24.3(16.1-35.1) | -0.57 (-0.61 to -0.54) | p<0.001 |
| Angola | 8816.4(6396.9-12228.8) | 275.1(199.6-381.6) | 9793.7(9189.2-10400.9) | 92.8(87-98.5) | -3.16 (-3.45 to -2.8) | p<0.001 | 1319.8(967.3-1828.9) | 41.2(30.2-57.1) | 1520.6(1030.5-2145.6) | 14.4(9.8-20.3) | -3.25 (-3.61 to -2.87) | p<0.001 |
| Antigua and Barbuda | 24.8(23-26.9) | 142.9(132.5-155) | 31.2(28.4-34) | 158.3(144.2-172.6) | 0.31 (0.17 to 0.43) | p<0.001 | 3.8(2.5-5.3) | 21.6(14.4-30.6) | 4.7(3.2-6.6) | 23.8(16.2-33.5) | 0.26 (0.11 to 0.43) | 0.002 |
| Argentina | 16556.8(14336.1-19339.7) | 190(164.6-222) | 19451.5(16903.6-22542.4) | 181.9(158.1-210.8) | -0.15 (-0.19 to -0.13) | p<0.001 | 2200.3(1483.2-3112.1) | 25.3(17-35.7) | 2581.8(1713.8-3687.2) | 24.1(16-34.5) | -0.16 (-0.19 to -0.14) | p<0.001 |
| Armenia | 3837.2(3061.1-5075.5) | 440.6(351.5-582.8) | 1349.5(1104.1-1700.1) | 250.4(204.9-315.5) | -1.28 (-1.86 to -0.27) | 0.014 | 581(418.1-781.1) | 66.7(48-89.7) | 203.2(147.5-269.4) | 37.7(27.4-50) | -1.48 (-2.12 to -0.62) | 0.002 |
| Australia | 12938.7(11364.5-14924.7) | 325.9(286.3-375.9) | 12069.8(10520-14087) | 255.5(222.7-298.2) | -0.79 (-0.8 to -0.78) | p<0.001 | 1714.8(1172.7-2394.2) | 43.2(29.5-60.3) | 1591.9(1055.2-2242.1) | 33.7(22.3-47.5) | -0.81 (-0.83 to -0.8) | p<0.001 |
| Austria | 4617.2(4175.7-5121.7) | 283.9(256.7-314.9) | 2641.8(2331.7-3014.4) | 187(165-213.4) | -1.34 (-1.36 to -1.33) | p<0.001 | 626.2(441.6-869.9) | 38.5(27.1-53.5) | 356.3(241.1-498.4) | 25.2(17.1-35.3) | -1.36 (-1.39 to -1.34) | p<0.001 |
| Azerbaijan | 4710.1(4376.3-5116.3) | 222.7(206.9-241.9) | 3968.1(3573.9-4414.3) | 179.9(162-200.1) | -0.78 (-1.03 to -0.55) | p<0.001 | 727.2(483.6-1004.6) | 34.4(22.9-47.5) | 599.4(412.1-851.6) | 27.2(18.7-38.6) | -0.73 (-1.16 to -0.43) | p<0.001 |
| Bahamas | 115.3(107.7-123.5) | 142.7(133.3-152.9) | 148.7(135.9-165) | 150(137.1-166.4) | 0.24 (0.14 to 0.48) | 0.008 | 17.7(11.9-25.4) | 21.9(14.7-31.4) | 22.9(15.4-31.2) | 23.1(15.5-31.5) | 0.13 (-0.01 to 0.27) | 0.071 |
| Bahrain | 225.5(210.2-242.5) | 174.5(162.6-187.6) | 514.5(478.7-562) | 153.2(142.6-167.4) | -0.42 (-0.48 to -0.36) | p<0.001 | 34.9(23-48.5) | 27(17.8-37.5) | 79.2(52.6-108.2) | 23.6(15.7-32.2) | -0.45 (-0.49 to -0.4) | p<0.001 |
| Bangladesh | 30468.9(27803.6-33452.1) | 87.3(79.7-95.9) | 37852.6(34505.2-41533.1) | 82.7(75.3-90.7) | -0.25 (-0.6 to 0.06) | 0.098 | 4635.4(3167.8-6566.1) | 13.3(9.1-18.8) | 5764.6(3861.9-8120.7) | 12.6(8.4-17.7) | -1.03 (-1.48 to -0.58) | p<0.001 |
| Barbados | 88.1(82.4-94.7) | 130.4(122-140.3) | 70.6(65.6-76.5) | 123.6(114.8-134) | -0.16 (-0.21 to -0.1) | p<0.001 | 13.5(9.1-19) | 20(13.5-28.2) | 10.8(7.6-15.1) | 18.8(13.3-26.4) | -0.17 (-0.21 to -0.12) | p<0.001 |
| Belarus | 7638.5(7116.5-8302.9) | 345(321.4-375) | 3415.8(3115.4-3781.9) | 240.2(219.1-266) | -1.17 (-1.21 to -1.14) | p<0.001 | 1176.3(815.6-1647.7) | 53.1(36.8-74.4) | 518.5(343.3-725.4) | 36.5(24.1-51) | -1.21 (-1.25 to -1.19) | p<0.001 |
| Belgium | 5044.7(4521.2-5614.3) | 250.6(224.6-278.9) | 3478.4(3072-3994.4) | 177.1(156.4-203.3) | -1.12 (-1.17 to -1.09) | p<0.001 | 682.2(459.5-959.6) | 33.9(22.8-47.7) | 469.1(319.1-670.8) | 23.9(16.2-34.1) | -1.13 (-1.19 to -1.09) | p<0.001 |
| Belize | 98.2(92.1-104.7) | 157.2(147.3-167.5) | 215.7(199.7-231.8) | 163.3(151.2-175.5) | 0.05 (-0.03 to 0.13) | 0.192 | 15(10.2-20.7) | 24 (16.3-33.1) | 33.3(23.2-46.3) | 25.2(17.6-35) | 0.06 (-0.02 to 0.15) | 0.122 |
| Benin | 1305.1(1233.6-1382.9) | 90.5(85.5-95.8) | 3628.1(3401.2-3869.5) | 82.9(77.7-88.4) | -0.28 (-0.29 to -0.27) | p<0.001 | 198.1(131.6-279.4) | 13.7(9.1-19.4) | 554.6(349.6-801.2) | 12.7(8-18.3) | -0.28 (-0.31 to -0.26) | p<0.001 |
| Bermuda | 18.1(16.8-19.4) | 145.2(134.9-156.1) | 11.8(10.9-12.9) | 129.1(119-141.2) | -0.4 (-0.42 to -0.37) | p<0.001 | 2.8(1.9-4) | 22.3(14.9-31.8) | 1.8(1.2-2.5) | 19.6(13.3-27.8) | -0.42 (-0.44 to -0.39) | p<0.001 |
| Bhutan | 197.5(183.8-213.7) | 86.8(80.8-93.9) | 212.4(191.5-237.8) | 103.8(93.6-116.2) | 0.53 (0.35 to 0.7) | p<0.001 | 30.1(19.7-44.7) | 13.2(8.7-19.6) | 32.2(21.8-44.8) | 15.8(10.6-21.9) | 0.6 (0.44 to 0.77) | p<0.001 |
| Bolivia (Plurinational State of) | 3159(2958.7-3357.2) | 157.7(147.7-167.6) | 3914.8(3649.8-4209.1) | 121(112.8-130.1) | -0.86 (-0.87 to -0.84) | p<0.001 | 482.4(334.7-685.1) | 24.1(16.7-34.2) | 593.7(387.3-830.6) | 18.4(12-25.7) | -0.88 (-0.9 to -0.86) | p<0.001 |
| Bosnia and Herzegovina | 4224.6(3829.4-4694.5) | 367.4(333.1-408.3) | 1537.7(1396.8-1713.5) | 284(258-316.5) | -0.77 (-0.99 to -0.49) | p<0.001 | 635.9(434.2-889.6) | 55.3(37.8-77.4) | 231.9(156.6-321.2) | 42.8(28.9-59.3) | -0.95 (-1.34 to -0.56) | p<0.001 |
| Botswana | 429.5(403.8-460.3) | 95.2(89.5-102.1) | 783.6(737.5-847.9) | 119.9(112.8-129.7) | 0.75 (0.73 to 0.77) | p<0.001 | 66.2(45-92.9) | 14.7(10-20.6) | 122.4(82.5-170.2) | 18.7(12.6-26) | 0.8 (0.77 to 0.82) | p<0.001 |
| Brazil | 121934.8 (112550.6-132795.9) | 261.5(241.4-284.8) | 104249.7 (95096.6-115197.7) | 214.6(195.7-237.1) | -0.64 (-0.65 to -0.62) | p<0.001 | 18647(12855.8-25799.2) | 40(27.6-55.3) | 15982.3(11228.9-21849.2) | 32.9(23.1-45) | -0.63 (-0.64 to -0.61) | p<0.001 |
| Brunei Darussalam | 157.8(143.5-175.9) | 207.1(188.4-230.9) | 153.5(138.3-171.1) | 144.7(130.4-161.3) | -1.15 (-1.16 to -1.13) | p<0.001 | 21.4(14.3-29.6) | 28.1(18.7-38.9) | 20.7(13.5-29.6) | 19.5(12.7-27.9) | -1.17 (-1.19 to -1.15) | p<0.001 |
| Bulgaria | 7950.1(7318.6-8659.6) | 431.4(397.1-469.9) | 3187.6(2892.8-3486) | 328.4(298-359.1) | -0.88 (-0.9 to -0.86) | p<0.001 | 1210.3(820.2-1678.5) | 65.7(44.5-91.1) | 485.3(334.3-677.9) | 50(34.4-69.8) | -0.88 (-0.91 to -0.86) | p<0.001 |
| Burkina Faso | 2618.7(2482.1-2780.6) | 89.3(84.7-94.9) | 7265.3(6716.8-7959.7) | 99.9(92.4-109.5) | 0.41 (0.34 to 0.48) | p<0.001 | 397(257.3-548.7) | 13.5(8.8-18.7) | 1111.8(763-1490.3) | 15.3(10.5-20.5) | 0.45 (0.38 to 0.54) | p<0.001 |
| Burundi | 1521.1(1433.5-1619.8) | 90.7(85.5-96.6) | 4023.5(3476.3-4744.2) | 93.2(80.5-109.9) | -0.22 (-0.54 to 0.06) | 0.1 | 230.9(152.8-323.6) | 13.8(9.1-19.3) | 605.8(428-817.3) | 14(9.9-18.9) | 0.05 (-0.68 to 0.72) | 0.784 |
| Cabo Verde | 106(99.3-113.3) | 92.9(87-99.2) | 129.7(120.6-139.5) | 86.4(80.4-93) | -0.22 (-0.24 to -0.21) | p<0.001 | 16.3(10.6-23.6) | 14.2(9.3-20.7) | 20(13.2-29.4) | 13.3(8.8-19.6) | -0.2 (-0.23 to -0.17) | p<0.001 |
| Cambodia | 10038.3(5669.4-21417.9) | 313(176.8-667.9) | 4978.3(4643.7-5400.1) | 107.5(100.3-116.6) | -3.36 (-3.55 to -3.15) | p<0.001 | 1497.1(817.1-2913.2) | 46.7(25.5-90.8) | 765.6(524.1-1081) | 16.5(11.3-23.3) | -3.29 (-3.36 to -3.2) | p<0.001 |
| Cameroon | 2723.2(2529.4-2940.3) | 84.5(78.5-91.2) | 9522.5(8634.2-10524.4) | 91.7(83.1-101.3) | 0.34 (0.27 to 0.4) | p<0.001 | 414.2(285.5-583.5) | 12.8(8.9-18.1) | 1460.4 (985.9-2078) | 14.1(9.5-20) | 0.36 (0.29 to 0.43) | p<0.001 |
| Canada | 8762(8001.5-9743.9) | 150.3(137.3-167.2) | 5958(5396.4-6661.4) | 92.2(83.5-103) | -1.57 (-1.58 to -1.55) | p<0.001 | 1182.9(764.1-1676.6) | 20.3(13.1-28.8) | 802.6(514.9-1154.3) | 12.4(8-17.9) | -1.58 (-1.61 to -1.56) | p<0.001 |
| Central African Republic | 985.8(923.3-1055.4) | 117(109.6-125.3) | 3298.7(2760.4-4078.4) | 181.8(152.1-224.8) | 1.4 (0.92 to 1.7) | p<0.001 | 150.9(100-215.5) | 17.9(11.9-25.6) | 504.2(353.8-691.3) | 27.8(19.5-38.1) | 1.38 (1.13 to 1.59) | p<0.001 |
| Chad | 2809.4(2138.2-3765.7) | 153.9(117.1-206.3) | 5584.9(5134-6134.9) | 95.7(88-105.2) | -1.6 (-1.98 to -1.34) | p<0.001 | 422.1(289.6-576.1) | 23.1(15.9-31.6) | 853.9(588-1181.5) | 14.6(10.1-20.3) | -1.64 (-1.95 to -1.36) | p<0.001 |
| Chile | 6647.2(5874.2-7522.7) | 176.9(156.3-200.2) | 7765.9(6807.5-8923) | 197.9(173.5-227.4) | 0.35 (0.33 to 0.37) | p<0.001 | 888.6(595.5-1268.7) | 23.6(15.8-33.8) | 1036.6(713.7-1459.6) | 26.4(18.2-37.2) | 0.34 (0.3 to 0.39) | p<0.001 |
| China | 619773.1  (580918.3-659261.9) | 171.7(160.9-182.6) | 283557.4  (263155.2-306436.6) | 121.2(112.4-130.9) | -1.14 (-1.22 to -1.08) | p<0.001 | 96449.6(66703.2-133618.6) | 26.7(18.5-37) | 44009.3(30042.7-60017.1) | 18.8(12.8-25.6) | -1.14 (-1.22 to -1.08) | p<0.001 |
| Colombia | 32148.4 (29277-35562.1) | 314(286-347.3) | 24017.5 (22257.1-25920.1) | 200.7(186-216.6) | -1.43 (-1.48 to -1.38) | p<0.001 | 4941.7(3374.3-6680.8) | 48.3(33-65.3) | 3699.9(2476.6-5144.6) | 30.9(20.7-43) | -1.41 (-1.48 to -1.34) | p<0.001 |
| Comoros | 149.6(140.4-159.1) | 97.1(91.1-103.3) | 197.2(180-215) | 89.5(81.7-97.6) | -0.13 (-0.38 to 0.11) | 0.301 | 22.8(15.1-32) | 14.8(9.8-20.8) | 30(21.2-41.8) | 13.6(9.6-19) | -0.29 (-0.51 to -0.05) | 0.022 |
| Congo | 809.3(761.7-866.9) | 99.3(93.5-106.4) | 1331.2(1242.2-1424.6) | 79.8(74.5-85.4) | -0.84 (-1.04 to -0.63) | p<0.001 | 123.9(81.9-177.4) | 15.2(10.1-21.8) | 204.8(138.8-289.3) | 12.3(8.3-17.4) | -0.94 (-1.74 to -0.07) | 0.041 |
| Cook Islands | 7 (6.4-7.6) | 118(108.6-128.4) | 4 (3.5-4.5) | 96.8(86.2-109.2) | -0.54 (-0.76 to -0.3) | p<0.001 | 1.1(0.7-1.5) | 18.4(12.6-25.1) | 0.6(0.4-0.8) | 15(10.2-20.8) | -0.73 (-1.05 to -0.4) | p<0.001 |
| Costa Rica | 1733.5(1600.1-1882.7) | 188.2(173.7-204.4) | 1920.8(1763.1-2108.9) | 175.6(161.2-192.8) | -0.23 (-0.24 to -0.21) | p<0.001 | 262.7(179.3-375) | 28.5(19.5-40.7) | 292.3(190.3-410.1) | 26.7(17.4-37.5) | -0.21 (-0.23 to -0.2) | p<0.001 |
| Cote d'Ivoire | 3363.9(3174-3594) | 88 (83-94) | 7304.9(6830.5-7834) | 84.9(79.4-91.1) | -0.12 (-0.18 to -0.03) | 0.013 | 511.9(342.5-720.1) | 13.4 (9-18.8) | 1123.5(753.1-1621.9) | 13.1(8.8-18.9) | -0.08 (-0.16 to 0.03) | 0.167 |
| Croatia | 4279.8(3969.5-4629.1) | 414.3(384.2-448.1) | 1960.6(1798.3-2159.2) | 296.1(271.6-326.1) | -1.15 (-1.3 to -0.99) | p<0.001 | 654.7(450.1-922.7) | 63.4(43.6-89.3) | 298.9(198.9-416.7) | 45.1(30-62.9) | -1.28 (-1.56 to -1.01) | p<0.001 |
| Cuba | 5888.2(5487-6330) | 189.3(176.4-203.5) | 2951.8(2722.7-3215) | 151.2(139.5-164.7) | -0.75 (-0.78 to -0.73) | p<0.001 | 905.2(600-1239.5) | 29.1(19.3-39.9) | 449.5(299.9-636.4) | 23(15.4-32.6) | -0.77 (-0.81 to -0.74) | p<0.001 |
| Cyprus | 421.6(382-470.4) | 221.7(200.9-247.4) | 399.4(356.5-455.6) | 184.4(164.7-210.4) | -0.59 (-0.61 to -0.57) | p<0.001 | 57.3(38.7-81.6) | 30.1(20.3-42.9) | 53.9(35.7-77.3) | 24.9(16.5-35.7) | -0.61 (-0.65 to -0.58) | p<0.001 |
| Czechia | 10251.2(9346.9-11152.7) | 431.5(393.4-469.4) | 4930.3 (4470.2-5444.4) | 315.7(286.2-348.6) | -0.99 (-1.05 to -0.94) | p<0.001 | 1561.6(1059.6-2246.8) | 65.7(44.6-94.6) | 749(504.1-1054.6) | 48(32.3-67.5) | -1.01 (-1.06 to -0.95) | p<0.001 |
| Democratic People's Republic of Korea | 6881.8(6493.1-7330.5) | 125(118-133.2) | 5507.6(5194.9-5900.7) | 101(95.3-108.2) | -0.7 (-0.72 to -0.68) | p<0.001 | 1083(726.7-1518.5) | 19.7(13.2-27.6) | 876.9(590.3-1249.8) | 16.1(10.8-22.9) | -0.66 (-0.69 to -0.63) | p<0.001 |
| Democratic Republic of the Congo | 13986.3(13102.1-14961.2) | 116.5(109.1-124.6) | 30570.8 (27925.7-33540) | 102.6(93.7-112.6) | -0.52 (-0.68 to -0.34) | p<0.001 | 2137.5(1439-3046.2) | 17.8(12-25.4) | 4680.4(3107.5-6515.9) | 15.7(10.4-21.9) | -0.53 (-0.94 to -0.12) | 0.018 |
| Denmark | 2185.9(1967.6-2437.5) | 199.9(180-222.9) | 1709.6(1496.9-1968.5) | 162.8(142.5-187.5) | -0.66 (-0.68 to -0.64) | p<0.001 | 296.9(196.9-418.9) | 27.2(18-38.3) | 231.8(152.1-330.4) | 22.1(14.5-31.5) | -0.66 (-0.69 to -0.64) | p<0.001 |
| Djibouti | 152.4(139-171.3) | 103.7(94.6-116.5) | 309.2(289.9-331.9) | 86.9(81.5-93.3) | -0.56 (-0.68 to -0.47) | p<0.001 | 23.5(15.5-32.3) | 16 (10.6-22) | 47.2(31.8-64.5) | 13.3(8.9-18.1) | -0.58 (-0.76 to -0.43) | p<0.001 |
| Dominica | 29.3(27.4-31.4) | 128.3(120.1-137.6) | 24.8(22.5-27.7) | 150.3(136.7-168.4) | 0.55 (0.44 to 0.71) | p<0.001 | 4.5(3.1-6.3) | 19.6(13.4-27.6) | 3.8(2.6-5.1) | 23(15.8-30.7) | 0.57 (0.42 to 0.74) | p<0.001 |
| Dominican Republic | 3300.8(3091.8-3511.9) | 138.6(129.8-147.4) | 4275(3999.1-4600.8) | 149.6(140-161) | 0.25 (0.21 to 0.29) | p<0.001 | 506.9(352.8-705.9) | 21.3(14.8-29.6) | 656.2(439.9-938.1) | 23(15.4-32.8) | 0.24 (0.21 to 0.27) | p<0.001 |
| Ecuador | 5567.7(5165.9-6083.3) | 170.8(158.4-186.6) | 7706.3(7164.3-8362.3) | 158.6(147.4-172.1) | -0.22 (-0.29 to -0.17) | p<0.001 | 858.9(586.3-1158.7) | 26.3(18-35.5) | 1182.8(835.7-1642.1) | 24.3(17.2-33.8) | -0.23 (-0.29 to -0.16) | p<0.001 |
| Egypt | 46598.3(43509.4-50002.1) | 270.9(252.9-290.7) | 46003.8(43039.3-49507.4) | 154.6(144.7-166.4) | -1.78 (-1.81 to -1.75) | p<0.001 | 7226.3(4971.1-10034.7) | 42 (28.9-58.3) | 7148.3 (4705.9-9757) | 24(15.8-32.8) | -1.77 (-1.81 to -1.74) | p<0.001 |
| El Salvador | 11034.7(7393.5-16724.8) | 621.1(416.1-941.3) | 3800.5(3516-4131.8) | 217.4(201.1-236.3) | -3.32 (-3.47 to -3.14) | p<0.001 | 1651.6(1140.4-2436.7) | 93(64.2-137.1) | 589.1(412.2-830.6) | 33.7(23.6-47.5) | -3.22 (-3.29 to -3.14) | p<0.001 |
| Equatorial Guinea | 141.3(132.7-150.5) | 108.4(101.8-115.4) | 438.1(409.5-472) | 80 (74.8-86.2) | -0.98 (-1 to -0.96) | p<0.001 | 21.5(14.4-30.2) | 16.5(11.1-23.2) | 68(43.2-96.4) | 12.4(7.9-17.6) | -0.92 (-0.96 to -0.88) | p<0.001 |
| Eritrea | 10667.5(5934.1-17730.3) | 946.6(526.6-1573.3) | 1824.3(1699.8-1986.9) | 87.5(81.5-95.3) | -7.6 (-7.76 to -7.45) | p<0.001 | 1620.3(1007-2612.4) | 143.8(89.4-231.8) | 281.3(189.4-397.1) | 13.5(9.1-19) | -7.61 (-7.82 to -7.4) | p<0.001 |
| Estonia | 1348.6(1262.8-1452.2) | 412.9(386.6-444.6) | 439.4(403.8-485.1) | 217.3(199.7-239.9) | -2.07 (-2.11 to -2.04) | p<0.001 | 207.6(142.7-295.6) | 63.6(43.7-90.5) | 66.7(44.4-92.6) | 33(22-45.8) | -2.11 (-2.16 to -2.08) | p<0.001 |
| Eswatini | 353.5(332.1-378.2) | 128.3(120.6-137.3) | 473(440.8-505.7) | 128.6(119.8-137.5) | 0 (-0.03 to 0.02) | 0.993 | 55.2(36.8-77.4) | 20 (13.4-28.1) | 73.5(47.9-103) | 20(13-28) | -0.01 (-0.05 to 0.02) | 0.466 |
| Ethiopia | 36172.8(28403.7-47633.3) | 224.8(176.6-296.1) | 32251.9(28335.6-38809.1) | 85.5(75.1-102.9) | -3.09 (-3.4 to -2.79) | p<0.001 | 5661.2(3716.1-8030.8) | 35.2(23.1-49.9) | 4935.5(3396.3-6781.2) | 13.1(9-18) | -3.01 (-3.31 to -2.71) | p<0.001 |
| Fiji | 208.5(193.2-225.2) | 87.6(81.2-94.7) | 196.9(180.9-215.3) | 82.2(75.5-89.9) | -0.17 (-0.22 to -0.12) | p<0.001 | 32.2(21.4-44.9) | 13.5 (9-18.9) | 30.6(21.1-44) | 12.8(8.8-18.4) | -0.18 (-0.23 to -0.12) | p<0.001 |
| Finland | 2488(2230.7-2827.7) | 255.6(229.2-290.5) | 1933.7(1690.6-2233.6) | 210.9(184.4-243.6) | -0.63 (-0.67 to -0.61) | p<0.001 | 336.8(232.2-467.8) | 34.6(23.9-48.1) | 260.5(169.9-366.2) | 28.4(18.5-39.9) | -0.62 (-0.67 to -0.58) | p<0.001 |
| France | 30248.1(27167.1-33861.3) | 239.3(214.9-267.9) | 21120(18624.3-24284.7) | 172.8(152.4-198.7) | -1.04 (-1.06 to -1.03) | p<0.001 | 4080.8(2699.1-5822.4) | 32.3(21.4-46.1) | 2836.9(1873.3-4109.7) | 23.2(15.3-33.6) | -1.07 (-1.09 to -1.05) | p<0.001 |
| Gabon | 321.8(303.2-341.5) | 104.8(98.7-111.2) | 486(455.6-520.9) | 86.1(80.7-92.3) | -0.62 (-0.64 to -0.61) | p<0.001 | 49(32.6-71.6) | 15.9(10.6-23.3) | 75(49.8-105.7) | 13.3(8.8-18.7) | -0.59 (-0.62 to -0.56) | p<0.001 |
| Gambia | 242.4(223-268.2) | 77.4(71.2-85.7) | 516.2(480.3-555.7) | 63.4(59-68.2) | -0.6 (-0.65 to -0.56) | p<0.001 | 36.5(24.8-51.3) | 11.7(7.9-16.4) | 78.1(51.4-110.5) | 9.6(6.3-13.6) | -0.61 (-0.67 to -0.56) | p<0.001 |
| Georgia | 3413.9(3129.1-3743.5) | 265.8(243.6-291.5) | 1553.3(1424.8-1711.3) | 249.4(228.7-274.7) | -0.14 (-0.3 to -0.02) | 0.028 | 519.3(343.4-727) | 40.4(26.7-56.6) | 235.7(158.9-330.2) | 37.8(25.5-53) | -0.14 (-0.35 to 0.02) | 0.084 |
| Germany | 33686(30488.2-37536.2) | 226.1(204.7-252) | 21158.4(18691.3-24200.4) | 167.6(148.1-191.7) | -0.97 (-0.99 to -0.95) | p<0.001 | 4582.9(3136.4-6508.4) | 30.8(21.1-43.7) | 2856.3 (1936.7-4113) | 22.6(15.3-32.6) | -0.99 (-1 to -0.97) | p<0.001 |
| Ghana | 3599.5(3390.5-3852.2) | 76.4(72-81.8) | 7916.1(7429.9-8477.6) | 75.4(70.7-80.7) | -0.05 (-0.07 to -0.04) | p<0.001 | 548.2(345.6-792.2) | 11.6(7.3-16.8) | 1213.4(798.6-1741.9) | 11.6(7.6-16.6) | -0.02 (-0.05 to 0) | 0.088 |
| Greece | 5477.3(4911.6-6165) | 233.7(209.6-263.1) | 2579.3(2307.8-2932.4) | 167.1(149.5-189.9) | -1.08 (-1.1 to -1.05) | p<0.001 | 741.9(506.9-1078.3) | 31.7 (21.6-46) | 346.4(236.4-497.9) | 22.4(15.3-32.3) | -1.1 (-1.13 to -1.08) | p<0.001 |
| Greenland | 22.4(20.4-24.5) | 161.7(147.6-177.4) | 11.1(9.9-12.4) | 98.1(87.8-109.9) | -1.59 (-1.62 to -1.57) | p<0.001 | 3(2-4.2) | 21.8(14.7-30.4) | 1.5 (1-2.1) | 13.2(8.7-18.9) | -1.61 (-1.64 to -1.59) | p<0.001 |
| Grenada | 45.8(38-58.6) | 174.2(144.8-223.2) | 35.3(32.5-38.4) | 138.8(128-151.2) | -0.75 (-0.87 to -0.61) | p<0.001 | 6.9(4.8-9.4) | 26.3(18.4-35.9) | 5.3 (3.6-7.5) | 21(14.3-29.5) | -0.77 (-0.83 to -0.71) | p<0.001 |
| Guam | 42.9(40-46.4) | 109.4(102-118.3) | 30.3(28.3-33.1) | 84.3(78.6-92.1) | -0.85 (-0.86 to -0.83) | p<0.001 | 6.7(4.4-9.7) | 17.1(11.2-24.8) | 4.7 (3.1-6.6) | 13(8.6-18.4) | -0.9 (-0.92 to -0.88) | p<0.001 |
| Guatemala | 8322.9(6598.1-11571.8) | 312(247.4-433.8) | 9978.8(9209.5-10716.3) | 201.8(186.2-216.7) | -1.35 (-1.44 to -1.22) | p<0.001 | 1244.7(879.8-1719.8) | 46.7 (33-64.5) | 1513 (1054.8-2109) | 30.6(21.3-42.7) | -1.3 (-1.35 to -1.24) | p<0.001 |
| Guinea | 1562.7(1468.6-1662.8) | 93.3(87.7-99.3) | 3871.8(3645.8-4112) | 89.4(84.2-94.9) | -0.15 (-0.24 to -0.09) | 0.009 | 236.7(158.9-328.7) | 14.1(9.5-19.6) | 589.6 (386.5-826.4) | 13.6(8.9-19.1) | -0.14 (-0.26 to -0.04) | 0.014 |
| Guinea-Bissau | 380.9(358.8-404.8) | 117.8(111-125.2) | 620.7(584.8-661.2) | 92.4 (87-98.4) | -0.87 (-1 to -0.77) | p<0.001 | 58.3(38.5-83.2) | 18 (11.9-25.8) | 95.8(63.6-133.6) | 14.3(9.5-19.9) | -0.89 (-1.2 to -0.54) | p<0.001 |
| Guyana | 366.3(344.3-389.9) | 141.3(132.8-150.4) | 332.6(311.6-358.9) | 159.2(149.1-171.8) | 0.32 (0.26 to 0.37) | p<0.001 | 55.9(38.3-77.3) | 21.6(14.8-29.8) | 50.9(34.1-71.9) | 24.4(16.3-34.4) | 0.32 (0.26 to 0.38) | p<0.001 |
| Haiti | 3493.2(3293.5-3714.5) | 180(169.7-191.4) | 21591.8(14340.7-33469.9) | 577.2(383.4-894.8) | 3.68 (2.21 to 5.02) | p<0.001 | 533.4(360.9-731.3) | 27.5(18.6-37.7) | 3259 (2194.7-4642.7) | 87.1(58.7-124.1) | 3.77 (2.76 to 4.6) | p<0.001 |
| Honduras | 3191.3(2984.1-3402.7) | 208.2(194.6-222) | 6573.1(5998.8-7307.3) | 206.4(188.4-229.4) | 0.03 (-0.17 to 0.22) | 0.817 | 488(323.1-671.7) | 31.8(21.1-43.8) | 1008(719.3-1385.1) | 31.7(22.6-43.5) | -0.03 (-0.34 to 0.28) | 0.81 |
| Hungary | 8506(7858.8-9193.1) | 369(340.9-398.8) | 4216.4(3825.8-4689.2) | 290.3(263.4-322.8) | -0.77 (-0.8 to -0.75) | p<0.001 | 1298.3(889.8-1750.2) | 56.3(38.6-75.9) | 637.9(433-888.7) | 43.9(29.8-61.2) | -0.8 (-0.83 to -0.77) | p<0.001 |
| Iceland | 134.8(121.2-151.4) | 213.3(191.7-239.6) | 111.8(98.9-128) | 163.9(145-187.7) | -0.85 (-0.89 to -0.81) | p<0.001 | 18.1(12.4-25) | 28.7(19.6-39.6) | 15 (10.2-21.3) | 22(15-31.3) | -0.86 (-0.89 to -0.83) | p<0.001 |
| India | 333270.5  (307622.9-362466.4) | 129.3(119.3-140.6) | 382683.6 (352306.4-418394.6) | 96.2(88.6-105.2) | -0.96 (-0.99 to -0.93) | p<0.001 | 50489.6(34808.9-68561) | 19.6(13.5-26.6) | 58254.6(40533.8-78472.9) | 14.6(10.2-19.7) | -0.94 (-0.97 to -0.91) | p<0.001 |
| Indonesia | 98847.3(90054.6-114837.6) | 166.3(151.5-193.2) | 75591.9(69586.1-82944.9) | 109.3(100.6-120) | -1.36 (-1.48 to -1.27) | p<0.001 | 15212.1(10535.8-20532.7) | 25.6(17.7-34.5) | 11622.8(8174-15780.4) | 16.8(11.8-22.8) | -1.39 (-1.55 to -1.28) | p<0.001 |
| Iran (Islamic Republic of) | 77527.4(68613.5-88523.7) | 420.7(372.3-480.4) | 33678.1(31304.1-36379) | 190.1(176.7-205.4) | -2.49 (-2.56 to -2.42) | p<0.001 | 11988(8486.7-15780) | 65.1(46.1-85.6) | 5198.5(3606.5-6961.5) | 29.3(20.4-39.3) | -2.52 (-2.59 to -2.45) | p<0.001 |
| Iraq | 35247.1(24675.8-50668.6) | 575.4(402.8-827.2) | 34606.2(27222.6-45754.3) | 276.5(217.5-365.5) | -2.2 (-2.44 to -1.98) | p<0.001 | 5272.5(3719-7290.1) | 86.1(60.7-119) | 5192.4(3797.9-6890.5) | 41.5(30.3-55.1) | -2.24 (-2.42 to -2.07) | p<0.001 |
| Ireland | 1958.5(1770.4-2194.3) | 201.1(181.8-225.3) | 1595.8(1403.6-1839.2) | 162.3(142.8-187) | -0.67 (-0.69 to -0.65) | p<0.001 | 264.5(180.8-381.4) | 27.2(18.6-39.2) | 213.4(144.5-310.2) | 21.7(14.7-31.5) | -0.69 (-0.75 to -0.66) | p<0.001 |
| Israel | 2627.8(2353.3-2951.2) | 193(172.8-216.7) | 3596.3(3188.6-4071.9) | 159.6(141.5-180.7) | -0.71 (-0.84 to -0.61) | p<0.001 | 354.2(236.8-509.5) | 26 (17.4-37.4) | 487.8(334.1-694.6) | 21.6(14.8-30.8) | -0.65 (-0.8 to -0.51) | p<0.001 |
| Italy | 32382.5(29022.6-36480.3) | 258.7(231.9-291.5) | 16287(14332.1-18505.8) | 187.2(164.8-212.7) | -1.04 (-1.07 to -1.02) | p<0.001 | 4367.4(2914.8-6107.9) | 34.9(23.3-48.8) | 2194.3(1504.3-3091.7) | 25.2(17.3-35.5) | -1.05 (-1.07 to -1.02) | p<0.001 |
| Jamaica | 1036.2(962.6-1122.2) | 135.7(126.1-147) | 950.9(867.6-1040.9) | 134(122.3-146.7) | 0 (-0.05 to 0.05) | 0.943 | 156.4(107.4-220.5) | 20.5(14.1-28.9) | 143.7(95.3-196.7) | 20.2(13.4-27.7) | 0.01 (-0.04 to 0.06) | 0.52 |
| Japan | 49309.5(44705.7-55225.3) | 175.6(159.2-196.6) | 20412(18258.2-23176.7) | 116.2(103.9-131.9) | -1.33 (-1.35 to -1.31) | p<0.001 | 6681.6(4559.3-9271.2) | 23.8 (16.2-33) | 2750(1919.8-3883) | 15.7(10.9-22.1) | -1.35 (-1.37 to -1.33) | p<0.001 |
| Jordan | 2423.6(2266.8-2585.4) | 178.8(167.2-190.7) | 4960.2(4618.7-5342.6) | 131(121.9-141.1) | -1 (-1.02 to -0.97) | p<0.001 | 374.1(252.1-516.9) | 27.6(18.6-38.1) | 757.1(513.2-1053.2) | 20(13.5-27.8) | -1.04 (-1.06 to -1.01) | p<0.001 |
| Kazakhstan | 12662.9(11813.8-13577.8) | 289.9(270.5-310.8) | 8164.9(7539.5-8890) | 199(183.8-216.7) | -1.21 (-1.23 to -1.19) | p<0.001 | 1944.3(1340.6-2691.4) | 44.5(30.7-61.6) | 1239.7(842.1-1756.8) | 30.2(20.5-42.8) | -1.24 (-1.26 to -1.22) | p<0.001 |
| Kenya | 6228.2(5832.2-6673.2) | 78.5(73.5-84.1) | 12511.6(11627.8-13397.9) | 72.5(67.4-77.6) | -0.26 (-0.3 to -0.23) | p<0.001 | 950.4(652.6-1306.5) | 12 (8.2-16.5) | 1918.9(1311.2-2642.1) | 11.1(7.6-15.3) | -0.24 (-0.28 to -0.21) | p<0.001 |
| Kiribati | 21.6(20-23.5) | 96.8(89.6-105.1) | 23.8(22.2-25.6) | 67.4(62.9-72.5) | -1.16 (-1.29 to -1.06) | p<0.001 | 3.4(2.2-4.7) | 15.2(9.8-20.9) | 3.7(2.4-5.5) | 10.5(6.8-15.5) | -1.21 (-1.41 to -1.05) | p<0.001 |
| Kuwait | 1253.4(1086.6-1502.1) | 272(235.8-325.9) | 1272.5(1180.9-1374.2) | 152.6(141.7-164.8) | -2.06 (-2.2 to -1.9) | p<0.001 | 195.1(128.7-275.7) | 42.3(27.9-59.8) | 195.3(130.3-267.6) | 23.4(15.6-32.1) | -2.18 (-2.37 to -2) | p<0.001 |
| Kyrgyzstan | 3189.2(2967-3432.4) | 246.8(229.6-265.7) | 2808.3(2594.8-3067.5) | 158.3(146.2-172.9) | -1.47 (-1.51 to -1.43) | p<0.001 | 485.5(333.4-678.4) | 37.6(25.8-52.5) | 429.1(293.3-598.1) | 24.2(16.5-33.7) | -1.46 (-1.5 to -1.41) | p<0.001 |
| Lao People's Democratic Republic | 1953.1(1785.4-2217.1) | 151.4(138.4-171.9) | 2001.2(1867.9-2133.6) | 95.9(89.5-102.2) | -1.39 (-1.45 to -1.29) | p<0.001 | 303.5(203.6-422.9) | 23.5(15.8-32.8) | 310.8(208.6-434.4) | 14.9(10-20.8) | -1.43 (-1.49 to -1.35) | p<0.001 |
| Latvia | 2348.9(2207.6-2525.6) | 435.2(409.1-468) | 594(548.2-649.6) | 219(202.1-239.5) | -2.21 (-2.25 to -2.18) | p<0.001 | 363.2(250.7-508.1) | 67.3(46.5-94.1) | 90.6(59.6-126.4) | 33.4(22-46.6) | -2.25 (-2.31 to -2.21) | p<0.001 |
| Lebanon | 5099.5(3189.9-9386.5) | 587.7(367.6-1081.7) | 1610.4(1480.3-1769.9) | 135.9(124.9-149.3) | -4.75 (-4.97 to -4.46) | p<0.001 | 764.5(472-1391.5) | 88.1(54.4-160.4) | 247.1(171-346.3) | 20.8(14.4-29.2) | -4.46 (-4.64 to -4.25) | p<0.001 |
| Lesotho | 517.8(487.4-552.4) | 108.4(102-115.6) | 903.1(843-977.3) | 147.6(137.8-159.7) | 1.01 (0.98 to 1.05) | p<0.001 | 79.9(53.4-111.5) | 16.7(11.2-23.3) | 141.3(94.5-200.9) | 23.1(15.4-32.8) | 1.02 (0.98 to 1.06) | p<0.001 |
| Liberia | 1609.5(1190.8-2224.8) | 221.4(163.8-306) | 1210.3(1123.4-1313.3) | 67.3(62.5-73) | -3.34 (-3.95 to -2.54) | p<0.001 | 257.1(160-385.6) | 35.4 (22-53) | 182.9(119.5-258.4) | 10.2(6.6-14.4) | -3.13 (-4.01 to -1.99) | p<0.001 |
| Libya | 3480.5  (3187.5-3831) | 236.6(216.6-260.4) | 5406.9(4662.4-6532) | 310.1(267.4-374.6) | 1.03 (0.65 to 1.44) | p<0.001 | 536.1(381.3-719.8) | 36.4(25.9-48.9) | 822.3(589.7-1073.8) | 47.2(33.8-61.6) | 1.13 (0.88 to 1.37) | p<0.001 |
| Lithuania | 3106.9(2901.7-3338.2) | 379.7(354.7-408) | 937.6(864.7-1022.4) | 227.2(209.5-247.8) | -1.64 (-1.68 to -1.6) | p<0.001 | 477.9(330.2-662.5) | 58.4 (40.4-81) | 142.6(95.9-196) | 34.6(23.2-47.5) | -1.66 (-1.7 to -1.62) | p<0.001 |
| Luxembourg | 194.3(174.8-215.9) | 269(242-298.8) | 194(171.4-222.2) | 181.3(160.2-207.7) | -1.29 (-1.31 to -1.27) | p<0.001 | 26.3(17.8-37.4) | 36.5(24.6-51.7) | 26.2(17.5-38.4) | 24.5(16.4-35.9) | -1.3 (-1.32 to -1.28) | p<0.001 |
| Madagascar | 3388.3(3185.7-3621.1) | 88.5(83.2-94.6) | 6226.3 (5789.7-6699.5) | 64.8(60.3-69.7) | -0.99 (-1.02 to -0.97) | p<0.001 | 511.3(330.2-719) | 13.4(8.6-18.8) | 947.7(607.1-1373.7) | 9.9(6.3-14.3) | -0.98 (-1.03 to -0.95) | p<0.001 |
| Malawi | 2615(2465-2795.1) | 82.8(78-88.5) | 4744.6(4441.8-5078.4) | 66.7(62.4-71.4) | -0.72 (-0.75 to -0.69) | p<0.001 | 393.3(255-550.9) | 12.4(8.1-17.4) | 721.8(480.7-1046.2) | 10.1(6.8-14.7) | -0.69 (-0.73 to -0.65) | p<0.001 |
| Malaysia | 5888.6(5534.7-6304.3) | 109.6(103-117.4) | 7966.5(7411.8-8581.5) | 98.5(91.6-106) | -0.33 (-0.35 to -0.32) | p<0.001 | 913(610.9-1269.8) | 17 (11.4-23.6) | 1233.8(792.1-1765.1) | 15.2(9.8-21.8) | -0.35 (-0.37 to -0.33) | p<0.001 |
| Maldives | 73.9(68.2-80.3) | 103.2(95.3-112.1) | 101.5(90.5-116.3) | 101.7(90.7-116.5) | -0.02 (-0.28 to 0.28) | 0.751 | 11.3(7.8-16) | 15.8(10.8-22.3) | 15.4(10.7-21.1) | 15.4(10.7-21.1) | -0.01 (-0.33 to 0.37) | 0.897 |
| Mali | 2618.6(2436.4-2829.6) | 102.6(95.5-110.9) | 8106.7(7380.8-9030.6) | 101.4(92.3-113) | -0.03 (-0.22 to 0.16) | 0.727 | 398.7(265.8-548.4) | 15.6(10.4-21.5) | 1237.6 (869.2-1764) | 15.5(10.9-22.1) | -0.08 (-0.48 to 0.33) | 0.595 |
| Malta | 158.8(141.2-179.7) | 194.1(172.6-219.5) | 116.2(103-133.5) | 182.8(161.9-209.9) | -0.2 (-0.23 to -0.19) | p<0.001 | 21.4(14.3-30.7) | 26.2(17.5-37.5) | 15.6(10.5-21.7) | 24.5(16.4-34.2) | -0.2 (-0.23 to -0.17) | p<0.001 |
| Marshall Islands | 14(12.9-15.1) | 91.7(84.9-99) | 14.4(13.3-15.6) | 86.6(80.1-93.9) | -0.18 (-0.21 to -0.16) | p<0.001 | 2.2(1.4-3.1) | 14.5(9.3-20.6) | 2.2 (1.4-3.1) | 13.4(8.7-18.6) | -0.24 (-0.27 to -0.21) | p<0.001 |
| Mauritania | 689.6(647-737.2) | 108.3(101.6-115.8) | 1167.1(1091.1-1247.6) | 81.3(76-86.9) | -0.95 (-1 to -0.92) | p<0.001 | 106.1(68.8-150) | 16.7(10.8-23.6) | 180.1(120.3-254.5) | 12.5(8.4-17.7) | -0.93 (-0.95 to -0.9) | p<0.001 |
| Mauritius | 288.9(270.3-308.8) | 89(83.3-95.1) | 214(199.2-232.2) | 82.8(77.1-89.9) | -0.23 (-0.26 to -0.21) | p<0.001 | 44.1(28.8-64) | 13.6(8.9-19.7) | 32.7(20.9-46.9) | 12.7(8.1-18.1) | -0.24 (-0.27 to -0.21) | p<0.001 |
| Mexico | 86699.8(80139.2-93584.7) | 298.4(275.8-322.1) | 61405(56928.9-66722.8) | 185.1 (171.6-201.1) | -1.5 (-1.68 to -1.36) | p<0.001 | 13225.4(9053.7-18419.1) | 45.5(31.2-63.4) | 9409.5(6289.7-13097.6) | 28.4(19-39.5) | -1.48 (-1.63 to -1.35) | p<0.001 |
| Micronesia (Federated States of) | 34.5 (32.1-37.1) | 100.3 (93.5-108) | 34.4 (31.3-38.3) | 109.6(99.9-122.2) | 0.34 (0.2 to 0.44) | 0.001 | 5.4(3.6-7.6) | 15.6(10.5-22.3) | 5.4(3.6-7.5) | 17.1(11.4-23.9) | 0.33 (0.1 to 0.54) | 0.02 |
| Monaco | 8.3(7.3-9.3) | 190(168.8-214.4) | 8.7(7.7-9.9) | 164.6(145.9-188.2) | -0.46 (-0.48 to -0.45) | p<0.001 | 1.1(0.7-1.6) | 25.7(17.2-36) | 1.2(0.8-1.7) | 22.1(14.8-31.7) | -0.48 (-0.5 to -0.46) | p<0.001 |
| Mongolia | 1582.4(1476.9-1702.4) | 223.4(208.5-240.3) | 1601(1476.3-1743.4) | 210.8(194.4-229.6) | -0.18 (-0.21 to -0.15) | p<0.001 | 240.2(158-335.1) | 33.9(22.3-47.3) | 243.8(161.1-341.4) | 32.1(21.2-45) | -0.17 (-0.2 to -0.12) | p<0.001 |
| Montenegro | 561.5(514.4-614.6) | 354.1(324.4-387.6) | 346.9(315-382) | 295.8(268.6-325.7) | -0.59 (-0.61 to -0.57) | p<0.001 | 85.3(58.6-120.6) | 53.8(37-76) | 52.9(36.6-73.2) | 45.1(31.2-62.5) | -0.57 (-0.58 to -0.55) | p<0.001 |
| Morocco | 18777.9(17632.2-20038.1) | 231.9(217.8-247.5) | 14138.7(13245.4-15180.2) | 151.3(141.8-162.5) | -1.38 (-1.4 to -1.37) | p<0.001 | 2893.6(2024.6-3925.7) | 35.7(25-48.5) | 2168.5(1493.1-3065.6) | 23.2(16-32.8) | -1.4 (-1.43 to -1.38) | p<0.001 |
| Mozambique | 12446.7(7623.9-20563.1) | 301.2(184.5-497.6) | 9331.4(8617-10137.5) | 88.2(81.4-95.8) | -3.9 (-4.05 to -3.72) | p<0.001 | 1837.2(1188.3-3011.3) | 44.5(28.8-72.9) | 1422.4(948.8-2018.8) | 13.4(9-19.1) | -3.82 (-3.9 to -3.73) | p<0.001 |
| Myanmar | 23899.5(19377.4-36957.7) | 183(148.3-282.9) | 33611.7(26088.3-45545.2) | 220.5(171.2-298.8) | 0.59 (-0.03 to 1.25) | 0.058 | 3640.4(2434.9-5587.8) | 27.9(18.6-42.8) | 5116.1(3696.6-6874.2) | 33.6(24.3-45.1) | 0.71 (0.11 to 1.25) | 0.035 |
| Namibia | 861.5(678.6-1126.8) | 181.5(143-237.4) | 806.2(754.5-865.5) | 108.1(101.2-116.1) | -1.61(-1.68 to -1.53) | p<0.001 | 130.5(92.9-173.5) | 27.5(19.6-36.6) | 125.9(83.8-176.4) | 16.9(11.2-23.7) | -1.56 (-1.61 to -1.52) | p<0.001 |
| Nauru | 3.5(3.3-3.8) | 115.4(107.8-125) | 4 (3.8-4.3) | 117.4(109.7-126.9) | 0.06 (0.04 to 0.07) | p<0.001 | 0.5(0.4-0.8) | 18.1 (12-25.2) | 0.6(0.4-0.9) | 18.4(12.5-25.7) | 0.07 (0.04 to 0.09) | p<0.001 |
| Nepal | 6332.3 (5815.4-6969) | 106.3(97.6-117) | 11409.2(9916.4-13333.5) | 120.7(104.9-141.1) | 0.48 (0.3 to 0.68) | p<0.001 | 953(656.5-1341.8) | 16 (11-22.5) | 1725.2(1195.9-2344.5) | 18.3(12.7-24.8) | 0.52 (0.2 to 0.83) | 0.003 |
| Netherlands | 5517(4999.1-6133.8) | 168.4(152.6-187.2) | 3832.4(3402.6-4351.7) | 127.3(113.1-144.6) | -0.9 (-0.93 to -0.88) | p<0.001 | 752(512.5-1034) | 23 (15.6-31.6) | 513.7(346.3-717.8) | 17.1(11.5-23.8) | -0.96 (-0.99 to -0.94) | p<0.001 |
| New Zealand | 3318.3(2917.4-3836.1) | 394.6(346.9-456.1) | 3082.2(2715.7-3567.3) | 304.4(268.2-352.3) | -0.84 (-0.86 to -0.82) | p<0.001 | 439.8(301.2-633.4) | 52.3(35.8-75.3) | 408.6(275-568.8) | 40.4(27.2-56.2) | -0.84 (-0.86 to -0.81) | p<0.001 |
| Nicaragua | 8038.7(4709.6-13440.6) | 612.7(359-1024.5) | 3068.7(2787.5-3397) | 163.1(148.1-180.5) | -4.14 (-4.35 to -3.95) | p<0.001 | 1184.2(713.1-1864.3) | 90.3(54.4-142.1) | 465.5(327.3-644.2) | 24.7(17.4-34.2) | -4.1 (-4.27 to -3.9) | p<0.001 |
| Niger | 2373.1(2231-2532.2) | 97(91.2-103.5) | 7695.4(7079.9-8472) | 91.4(84-100.6) | -0.19 (-0.3 to -0.11) | p<0.001 | 359.4(240.5-502.5) | 14.7(9.8-20.5) | 1181.8 (823.9-1700) | 14(9.8-20.2) | -0.15 (-0.23 to -0.06) | 0.001 |
| Nigeria | 26185.4(24501.1-28034.4) | 92.8(86.8-99.3) | 63887.3(58911.9-69422.4) | 82(75.6-89.1) | -0.43 (-0.47 to -0.39) | p<0.001 | 3955(2709-5352.5) | 14 (9.6-19) | 9745.3(6891.7-13310.3) | 12.5(8.8-17.1) | -0.4 (-0.44 to -0.35) | p<0.001 |
| Niue | 0.6 (0.6-0.7) | 96 (89.6-104) | 0.4 (0.4-0.5) | 106.8(96.8-119.2) | 0.31 (0.19 to 0.42) | p<0.001 | 0.1(0.1-0.1) | 15 (9.9-21.4) | 0.1(0-0.1) | 16.4(11.5-22.8) | 0.27 (0.08 to 0.41) | 0.014 |
| North Macedonia | 1622.7(1489.7-1780.9) | 317.8(291.7-348.8) | 1040.1(948.5-1140.1) | 281.6(256.8-308.7) | -0.4 (-0.43 to -0.38) | p<0.001 | 246.2(167.2-345.5) | 48.2(32.7-67.7) | 158.5(107-222.8) | 42.9(29-60.3) | -0.39 (-0.43 to -0.36) | p<0.001 |
| Northern Mariana Islands | 14.7(13.7-16) | 116.2(107.9-126.2) | 11.7(10.8-12.8) | 101.9(93.8-111.5) | -0.44 (-0.49 to -0.4) | p<0.001 | 2.3(1.5-3.2) | 18 (12-25.5) | 1.8(1.2-2.5) | 15.7(10.6-21.8) | -0.45 (-0.5 to -0.4) | p<0.001 |
| Norway | 1918.3 (1728.8-2156) | 209.3(188.6-235.2) | 1440.9(1282.7-1637) | 145.9(129.9-165.8) | -1.16 (-1.19 to -1.14) | p<0.001 | 258(173.5-360.7) | 28.1(18.9-39.4) | 193.3(130.9-273.3) | 19.6(13.3-27.7) | -1.17 (-1.19 to -1.15) | p<0.001 |
| Oman | 1893.8(1774.1-2030.6) | 348.4(326.4-373.6) | 2231(2089.6-2389.4) | 240.5(225.3-257.6) | -1.19 (-1.21 to -1.16) | p<0.001 | 296.4(198.1-409.8) | 54.5(36.4-75.4) | 348.7(232.6-490.8) | 37.6(25.1-52.9) | -1.19 (-1.22 to -1.16) | p<0.001 |
| Pakistan | 30297.6(28084.5-32645.4) | 85.1(78.8-91.6) | 73786.8(65231.1-83277.9) | 101.6(89.9-114.7) | 0.55 (0.42 to 0.71) | p<0.001 | 4643(3131.7-6477.2) | 13(8.8-18.2) | 11326.1(8206.1-15033.6) | 15.6(11.3-20.7) | 0.55 (0.39 to 0.72) | p<0.001 |
| Palau | 6.4(5.9-6.9) | 136(126.9-146.3) | 4.3(3.9-4.6) | 121.6(112.3-131.7) | -0.33 (-0.36 to -0.29) | p<0.001 | 1(0.7-1.4) | 21.2(14-29.6) | 0.7 (0.4-0.9) | 18.8(12.7-26.9) | -0.37 (-0.39 to -0.34) | p<0.001 |
| Palestine | 2446.1 (1749.3-3453) | 360.2(257.6-508.4) | 3047.9(2561.7-3767.1) | 184.4(155-227.9) | -2.2 (-2.33 to -2.07) | p<0.001 | 367.5(260.4-516.4) | 54.1(38.3-76) | 459.8(330.4-603.5) | 27.8(20-36.5) | -2.22 (-2.41 to -2.03) | p<0.001 |
| Panama | 1709.4(1478.7-2336.6) | 226.2(195.7-309.2) | 1868(1726.3-2017.9) | 169.5(156.6-183.1) | -0.94 (-0.96 to -0.9) | p<0.001 | 260.5(176.7-370.5) | 34.5(23.4-49) | 284.1(186.1-397.8) | 25.8(16.9-36.1) | -0.94 (-0.95 to -0.92) | p<0.001 |
| Papua New Guinea | 1418.3 (1321.3-1514) | 108.3(100.9-115.6) | 3978.4 (3598.9-4432) | 130.3(117.8-145.1) | 0.55 (0.39 to 0.72) | p<0.001 | 219(143-307.5) | 16.7(10.9-23.5) | 616.8(430-841.2) | 20.2(14.1-27.5) | 0.53 (0.26 to 0.82) | 0.001 |
| Paraguay | 2163.5(1930.8-2433.6) | 175.4(156.5-197.3) | 3398.5(3142.1-3724.1) | 170.7(157.9-187.1) | -0.08 (-0.1 to -0.06) | p<0. p<0.001001 | 327.5(216.8-459.1) | 26.5(17.6-37.2) | 518.5(347.5-721.5) | 26(17.5-36.2) | -0.05 (-0.09 to -0.02) | 0.002 |
| Peru | 14312.6(11980.9-18221.4) | 203.1(170-258.6) | 11322.6(10453.9-12320.6) | 123.5(114-134.4) | -1.67 (-1.72 to -1.63) | p<0.001 | 2181.7(1528.4-2975.4) | 31(21.7-42.2) | 1731.4(1190.1-2509) | 18.9(13-27.4) | -1.62 (-1.69 to -1.56) | p<0.001 |
| Philippines | 34639.9(29529.9-44100.3) | 169.2(144.2-215.4) | 32245(28751.9-36213.3) | 99.2(88.5-111.4) | -1.81 (-1.95 to -1.65) | p<0.001 | 5333.3(3786.6-7185.4) | 26(18.5-35.1) | 4957.8(3637-6564.5) | 15.3(11.2-20.2) | -1.8 (-1.91 to -1.69) | p<0.001 |
| Poland | 30514.7(28084.4-33109.8) | 355.9(327.6-386.2) | 14453.1(13144.6-15899.2) | 248.3(225.9-273.2) | -1.15 (-1.18 to -1.13) | p<0.001 | 4659.7(3141.3-6434) | 54.4(36.6-75) | 2192.7(1479.7-3055) | 37.7(25.4-52.5) | -1.17 (-1.19 to -1.15) | p<0.001 |
| Portugal | 6619.8(6042.1-7278.3) | 265.4(242.2-291.8) | 2095.9(1888.5-2355.7) | 127.8(115.1-143.6) | -2.34 (-2.37 to -2.32) | p<0.001 | 892.2(614.8-1260.2) | 35.8(24.6-50.5) | 282.3(187.2-403.3) | 17.2 (11.4-24.6) | -2.36 (-2.38 to -2.34) | p<0.001 |
| Puerto Rico | 1730.8(1613.4-1867.1) | 176.1(164.2-190) | 1037.3(937.7-1192.1) | 169.6(153.3-194.9) | -0.11 (-0.16 to -0.05) | 0.002 | 267.2(176.2-370.4) | 27.2(17.9-37.7) | 159(107.5-219.2) | 26 (17.6-35.8) | -0.16 (-0.23 to -0.08) | 0.001 |
| Qatar | 244.2(228.2-261.6) | 247.6(231.4-265.3) | 953.7(887.1-1033.8) | 214.1(199.2-232.1) | -0.51 (-0.57 to -0.44) | p<0.001 | 37.8(25.4-54.3) | 38.4(25.8-55) | 147.3(100.8-209.3) | 33.1(22.6-47) | -0.51 (-0.6 to -0.43) | p<0.001 |
| Republic of Korea | 33308.5(30397.3-36781.2) | 253.4(231.3-279.9) | 10555.8(9477.4-11948.7) | 136.9(123-155) | -1.97 (-2 to -1.96) | p<0.001 | 4501.9(3136.4-6292.2) | 34.3(23.9-47.9) | 1427(917.4-2029.2) | 18.5(11.9-26.3) | -1.99 (-2.03 to -1.97) | p<0.001 |
| Republic of Moldova | 3725.2(3514-3984.7) | 362.5(341.9-387.7) | 1222.6(1136.7-1324.6) | 224(208.3-242.7) | -1.51 (-1.57 to -1.47) | p<0.001 | 571.5(388.5-785) | 55.6(37.8-76.4) | 187(128.4-262.5) | 34.3(23.5-48.1) | -1.53 (-1.57 to -1.49) | p<0.001 |
| Romania | 25331.2(23380.7-27442.5) | 429.3(396.3-465.1) | 9366.8(8574.8-10281.1) | 301.9(276.4-331.4) | -1.15 (-1.18 to -1.11) | p<0.001 | 3846.5(2564.7-5399.6) | 65.2(43.5-91.5) | 1421.5(952.6-1980) | 45.8(30.7-63.8) | -1.13 (-1.17 to -1.09) | p<0.001 |
| Russian Federation | 138542.5(129521.8-149314) | 440.5(411.8-474.8) | 58475.7(54179.4-64061.2) | 248.2(230-271.9) | -1.84 (-1.87 to -1.82) | p<0.001 | 21282.3(14408.8-29398.5) | 67.7(45.8-93.5) | 8969.9(6004.7-12228.4) | 38.1(25.5-51.9) | -1.85 (-1.88 to -1.82) | p<0.001 |
| Rwanda | 3374.1(2964.6-4046.6) | 149(130.9-178.7) | 3498.1(3266.1-3727.7) | 81(75.7-86.4) | -1.82 (-2.56 to -1.33) | p<0.001 | 520.5(338.9-731.9) | 23(15-32.3) | 535(360.3-785) | 12.4(8.3-18.2) | -2.38 (-3.79 to -0.69) | 0.02 |
| Saint Kitts and Nevis | 17.9(16.7-19.2) | 140.6(131.6-150.8) | 21.1(19.5-22.7) | 172.9(160-186.3) | 0.68 (0.63 to 0.71) | p<0.001 | 2.7(1.8-3.7) | 21.5(14.3-29.3) | 3.2(2.1-4.5) | 26.4(17.6-37.1) | 0.67 (0.61 to 0.72) | p<0.001 |
| Saint Lucia | 61.7(57.8-66.1) | 136(127.4-145.8) | 51.7(48-55.9) | 142.5(132.3-154) | 0.15 (0.11 to 0.18) | p<0.001 | 9.4(6.4-13.1) | 20.8(14-28.9) | 7.9(5.3-11.2) | 21.9(14.6-30.9) | 0.15 (0.12 to 0.19) | p<0.001 |
| Saint Vincent and the Grenadines | 47.6(44.3-50.8) | 127.3(118.4-135.9) | 36.3(33.6-39.2) | 136.7(126.6-147.6) | 0.2 (0.16 to 0.24) | p<0.001 | 7.3(4.8-10.1) | 19.4(12.8-27.1) | 5.5(3.7-7.8) | 20.8(14.1-29.3) | 0.2 (0.15 to 0.25) | p<0.001 |
| Samoa | 57.5(53.4-62.4) | 97.5(90.5-105.8) | 84.3(67.7-109.5) | 134.7(108.2-174.9) | 0.84 (0.26 to 1.42) | 0.012 | 9(6-12.8) | 15.2(10.1-21.7) | 13(9.1-17.7) | 20.8(14.6-28.2) | 1.1 (0.63 to 1.58) | 0.004 |
| San Marino | 11.2(10.1-12.6) | 201(181-225.3) | 9.3(8.2-10.7) | 172.6(152.2-197.1) | -0.49 (-0.5 to -0.48) | p<0.001 | 1.5(1-2.2) | 27(18.2-38.9) | 1.2(0.8-1.8) | 23.1(15.4-33) | -0.51 (-0.54 to -0.48) | p<0.001 |
| Sao Tome and Principe | 40.3(37.4-43.9) | 99.7(92.5-108.6) | 66(61.1-72.5) | 93.6(86.6-102.8) | -0.23 (-0.25 to -0.2) | p<0.001 | 6.1(4.1-8.5) | 15.1(10.1-21.1) | 10.1(6.6-14.2) | 14.3(9.4-20.2) | -0.2 (-0.24 to -0.18) | p<0.001 |
| Saudi Arabia | 13899.2(12914.1-14937.8) | 275.6(256.1-296.2) | 20258.8(18573.5-22189.2) | 246(225.6-269.5) | -0.38 (-0.41 to -0.35) | p<0.001 | 2125.3(1434.5-2974) | 42.1(28.4-59) | 3104.4(2119.3-4348.7) | 37.7(25.7-52.8) | -0.37 (-0.39 to -0.34) | p<0.001 |
| Senegal | 1824.3(1706.3-1954) | 75.3(70.4-80.7) | 3467.1(3238.4-3727.5) | 66.3(61.9-71.2) | -0.37 (-0.44 to -0.31) | p<0.001 | 272.8(180.9-380.4) | 11.3(7.5-15.7) | 519.6(349-773.3) | 9.9(6.7-14.8) | -0.35 (-0.42 to -0.27) | p<0.001 |
| Serbia | 8116.4 (7520.5-8763) | 371.1(343.9-400.7) | 4383.8(3962.5-4844.7) | 271.5(245.4-300) | -1.26 (-1.45 to -1.09) | p<0.001 | 1241(830.8-1725.1) | 56.7(38-78.9) | 664.3(462.7-932.7) | 41.1(28.6-57.8) | -1.38 (-1.69 to -1.17) | p<0.001 |
| Seychelles | 21.8(20.3-23.6) | 97.9(90.7-105.9) | 18.9(17.6-20.5) | 86.4(80.3-93.4) | -0.39 (-0.45 to -0.34) | p<0.001 | 3.4(2.2-4.8) | 15(10.1-21.6) | 2.9(2-4.2) | 13.4(9-19.1) | -0.37 (-0.42 to -0.33) | p<0.001 |
| Sierra Leone | 1140(1078.9-1207.9) | 93.7(88.7-99.3) | 2368(2207.4-2538.5) | 81.4(75.9-87.2) | -0.55 (-0.71 to -0.4) | p<0.001 | 171.8(114-247.7) | 14.1(9.4-20.4) | 357.7(249.5-483.8) | 12.3(8.6-16.6) | -0.75 (-1.15 to -0.34) | 0.008 |
| Singapore | 1441.5(1302.5-1611.9) | 174.8(157.9-195.5) | 1009.9(896.9-1149.4) | 139.5(123.9-158.8) | -0.73 (-0.75 to -0.71) | p<0.001 | 195(127.2-289.2) | 23.6(15.4-35.1) | 135.9(92.7-195.2) | 18.8 (12.8-27) | -0.73 (-0.76 to -0.71) | p<0.001 |
| Slovakia | 4762.1(4369.1-5180.7) | 374.2(343.3-407.1) | 2509.9(2280.3-2774.5) | 300.2(272.8-331.9) | -0.71 (-0.73 to -0.69) | p<0.001 | 725.4(499.7-1009.6) | 57 (39.3-79.3) | 382.7(249.2-542.4) | 45.8(29.8-64.9) | -0.7 (-0.73 to -0.67) | p<0.001 |
| Slovenia | 2160.1(2002.9-2338.5) | 487.5(452-527.7) | 1047.7(950.6-1159) | 354.1(321.3-391.8) | -1.03 (-1.07 to -1) | p<0.001 | 329.8(221.9-454.3) | 74.4(50.1-102.5) | 158.8(105.5-219.9) | 53.7(35.7-74.3) | -1.05 (-1.09 to -1.02) | p<0.001 |
| Solomon Islands | 118.3(108.8-129.2) | 102.6(94.4-112) | 226.3(205.2-251.6) | 107.4(97.4-119.4) | 0.18 (0.09 to 0.29) | 0.002 | 18.4(12.1-25.4) | 15.9 (10.5-22) | 34.9(23.8-49) | 16.6(11.3-23.2) | 0.17 (0.08 to 0.27) | 0.002 |
| Somalia | 4311(2879.8-10154) | 169.3(113.1-398.7) | 10667.7(8697-13420.4) | 146.6(119.6-184.5) | -0.82 (-1.35 to -0.23) | 0.01 | 654.1(378.9-1403.1) | 25.7(14.9-55.1) | 1611.8(1125.3-2119.6) | 22.2(15.5-29.1) | -0.74 (-1.2 to -0.24) | 0.008 |
| South Africa | 24033.1(22018.7-26343.6) | 203.4(186.4-223) | 16451.4(15300.4-17771.9) | 114.8(106.8-124) | -1.85 (-1.88 to -1.83) | p<0.001 | 3736.7(2605-5125.8) | 31.6(22.1-43.4) | 2564.2(1742.9-3556.3) | 17.9(12.2-24.8) | -1.83 (-1.86 to -1.81) | p<0.001 |
| South Sudan | 2806.9(2242.3-3644.3) | 141.4(113-183.6) | 4199.4(3402.6-5356.1) | 123.5(100-157.5) | -0.07 (-0.51 to 0.37) | 0.731 | 418.2(297.3-562.3) | 21.1(15-28.3) | 629.2(435.5-846.3) | 18.5(12.8-24.9) | -0.47 (-1.14 to 0.03) | 0.062 |
| Spain | 20179.9(18249.3-22335.9) | 207.2(187.4-229.3) | 10711.6(9454.8-12386.9) | 153.1(135.1-177) | -0.97 (-1.01 to -0.94) | p<0.001 | 2728.6(1829.8-3901.4) | 28(18.8-40.1) | 1433.7(934-2071.7) | 20.5(13.3-29.6) | -1 (-1.05 to -0.97) | p<0.001 |
| Sri Lanka | 13950(10465.7-19280.3) | 269.4(202.1-372.3) | 8469(6883.1-10621.1) | 161.8(131.5-202.9) | -2.14 (-2.53 to -1.78) | p<0.001 | 2160.1(1425.2-3140.7) | 41.7(27.5-60.6) | 1288.1(958.6-1692.3) | 24.6(18.3-32.3) | -2.15 (-2.58 to -1.76) | p<0.001 |
| Sudan | 14561.9(12753.5-17137.4) | 225.4(197.4-265.3) | 21793.4(20026.5-23766) | 151.8(139.5-165.6) | -1.32 (-1.46 to -1.19) | p<0.001 | 2224.7(1534.3-3071.6) | 34.4(23.8-47.6) | 3338.9(2272.2-4552.7) | 23.3(15.8-31.7) | -1.35 (-1.53 to -1.15) | p<0.001 |
| Suriname | 214.1(176.7-322.8) | 175.2(144.6-264.2) | 183.7(171.3-196.5) | 129.3(120.5-138.3) | -1 (-1.02 to -0.98) | p<0.001 | 32.5(22.3-49.6) | 26.6(18.2-40.6) | 27.9(18.9-39.7) | 19.6(13.3-28) | -1.01 (-1.03 to -0.98) | p<0.001 |
| Sweden | 3349.4(3001.6-3752.7) | 202.3(181.3-226.7) | 2546.4(2255.7-2908.3) | 143.5(127.1-163.9) | -1.1 (-1.14 to -1.07) | p<0.001 | 452.2(311.5-628) | 27.3(18.8-37.9) | 339.9(224.7-484.7) | 19.2(12.7-27.3) | -1.12 (-1.16 to -1.08) | p<0.001 |
| Switzerland | 3946.9(3524.4-4466.7) | 296.8(265.1-335.9) | 2666.5(2355.7-3073.4) | 196.1(173.3-226) | -1.34 (-1.38 to -1.31) | p<0.001 | 527(365.3-742.1) | 39.6(27.5-55.8) | 356.1(239.5-499.4) | 26.2(17.6-36.7) | -1.34 (-1.38 to -1.3) | p<0.001 |
| Syrian Arab Republic | 7424(6580.2-9014.1) | 171.3(151.9-208) | 26173.6(15888.3-41967.4) | 565.9(343.5-907.4) | 4.08 (3.56 to 4.61) | p<0.001 | 1127.4(760.4-1545.1) | 26 (17.5-35.7) | 3857.7(2533-5737.3) | 83.4(54.8-124) | 3.99 (3.63 to 4.3) | p<0.001 |
| Taiwan (Province of China) | 8602.1 (8021.1-9222) | 150.5(140.3-161.3) | 3476.9(3241.4-3741.4) | 98.8(92.2-106.4) | -1.33 (-1.4 to -1.26) | p<0.001 | 1353.7(882.6-1915.4) | 23.7(15.4-33.5) | 545(352.8-756.8) | 15.5(10-21.5) | -1.32 (-1.4 to -1.25) | p<0.001 |
| Tajikistan | 3342.7(3099.6-3629.4) | 201.7(187-219) | 3934.2(3621-4332.6) | 141.5(130.3-155.9) | -0.99 (-1.28 to -0.58) | p<0.001 | 507.5(346-703.4) | 30.6(20.9-42.4) | 600.8(389.8-837.4) | 21.6(14-30.1) | -0.81 (-1.3 to -0.33) | 0.002 |
| Thailand | 34201.6(32051.8-36784.7) | 190.9(178.9-205.3) | 16502.2(15310.2-17735.9) | 140.4(130.3-150.9) | -1.01 (-1.06 to -0.97) | p<0.001 | 5371.6(3679.9-7515.5) | 30 (20.5-41.9) | 2565.9(1751.4-3615.8) | 21.8(14.9-30.8) | -1.04 (-1.1 to -0.97) | p<0.001 |
| Timor-Leste | 977.7(622.2-1473.7) | 424.7(270.3-640.2) | 385.2(356.8-411.9) | 81.4(75.4-87) | -5.42 (-5.77 to -5) | p<0.001 | 146.7(98.3-219.8) | 63.7(42.7-95.5) | 59.4(39.4-83.9) | 12.5(8.3-17.7) | -5.59 (-6.07 to -5.15) | p<0.001 |
| Togo | 1145.8(1079-1219.3) | 95.9(90.3-102.1) | 2252(2118.5-2403.7) | 86(80.9-91.8) | -0.47 (-0.56 to -0.38) | p<0.001 | 174.6(114.4-248.1) | 14.6(9.6-20.8) | 343.9(227.3-482.9) | 13.1(8.7-18.4) | -0.42 (-0.52 to -0.32) | p<0.001 |
| Tokelau | 0.4(0.4-0.4) | 86.8(81-93.3) | 0.3(0.2-0.3) | 72.2(66.7-79.1) | -0.59 (-0.63 to -0.56) | p<0.001 | 0.1(0-0.1) | 13.5(8.7-18.7) | 0 (0-0.1) | 11.2(7.2-16.4) | -0.58 (-0.63 to -0.54) | p<0.001 |
| Tonga | 26.5(24.6-28.6) | 79.3(73.5-85.7) | 21.2(19.5-23.1) | 68.1(62.6-74.3) | -0.5 (-0.6 to -0.42) | p<0.001 | 4.1(2.7-6) | 12.3 (8-17.9) | 3.2(2.1-4.5) | 10.4(6.8-14.5) | -0.54 (-0.63 to -0.45) | p<0.001 |
| Trinidad and Tobago | 485.3(454.3-522) | 141.4(132.4-152.1) | 421.7(382.3-468.7) | 153.8(139.5-171) | 0.35 (0.28 to 0.43) | p<0.001 | 74.6(51.2-106.8) | 21.7(14.9-31.1) | 64.3(43.5-90.5) | 23.5(15.9-33) | 0.35 (0.24 to 0.47) | p<0.001 |
| Tunisia | 6014.9(5653.5-6431.3) | 224.9(211.4-240.5) | 3755.2(3498-4076.4) | 149.6(139.3-162.4) | -1.31 (-1.33 to -1.29) | p<0.001 | 923.2(636.3-1288.8) | 34.5(23.8-48.2) | 572.7(390.1-775.7) | 22.8(15.5-30.9) | -1.32 (-1.35 to -1.3) | p<0.001 |
| Turkey | 30487.6(28524.3-32396.6) | 166.1(155.4-176.5) | 24693.1(22796.8-27047.9) | 128.3(118.4-140.5) | -0.85 (-0.9 to -0.79) | p<0.001 | 4655.7(3217.7-6603.7) | 25.4 (17.5-36) | 3753.7(2570.4-5444.6) | 19.5(13.4-28.3) | -0.85 (-0.93 to -0.76) | p<0.001 |
| Turkmenistan | 2499.8(2333.9-2689.7) | 218.1(203.6-234.6) | 2137.8(1961.2-2352.4) | 160.2(147-176.3) | -1 (-1.02 to -0.97) | p<0.001 | 380.8(252.3-536.6) | 33.2 (22-46.8) | 324.3(222.2-453.8) | 24.3(16.7-34) | -1.01 (-1.05 to -0.98) | p<0.001 |
| Tuvalu | 3 (2.8-3.2) | 121.1(113.1-130.5) | 3.2(3-3.5) | 92.4(85.3-100.5) | -0.9 (-0.93 to -0.88) | p<0.001 | 0.5(0.3-0.7) | 18.9(12.8-27.3) | 0.5(0.3-0.7) | 14.5(9.4-20.8) | -0.87 (-0.9 to -0.84) | p<0.001 |
| Uganda | 11555.3(7746.4-18031.8) | 204.5(137.1-319.2) | 12630.6(11773.1-13517.5) | 83.3(77.6-89.1) | -2.81 (-3 to -2.5) | p<0.001 | 1713.7(1148.3-2674.7) | 30.3(20.3-47.3) | 1941.4(1214-2751) | 12.8(8-18.1) | -2.71 (-2.85 to -2.55) | p<0.001 |
| Ukraine | 41465(38263.3-45534) | 382.1(352.6-419.6) | 18706.5(17212.3-20491.7) | 284.2(261.5-311.3) | -0.96 (-1.04 to -0.88) | p<0.001 | 6355.6(4306.2-8767.4) | 58.6(39.7-80.8) | 2872.3(1961.8-4002.8) | 43.6(29.8-60.8) | -0.96 (-1.04 to -0.89) | p<0.001 |
| United Arab Emirates | 1039.6(973.4-1113.7) | 247.1(231.3-264.7) | 1722.4(1596.1-1875.3) | 154.5(143.1-168.2) | -1.46 (-1.58 to -1.37) | p<0.001 | 160.6(109-227.3) | 38.2 (25.9-54) | 264.8(181.3-365.6) | 23.7(16.3-32.8) | -1.47 (-1.58 to -1.4) | p<0.001 |
| United Kingdom | 22360.6(20085-25113.6) | 188.7(169.5-211.9) | 15861.9(14085.4-18232.6) | 131.1(116.4-150.7) | -1.17 (-1.2 to -1.16) | p<0.001 | 3008.9(2055.3-4171.3) | 25.4(17.3-35.2) | 2122.7(1422.7-2988.9) | 17.5(11.8-24.7) | -1.19 (-1.21 to -1.17) | p<0.001 |
| United Republic of Tanzania | 7622.9(7160.2-8144) | 89.4(84-95.5) | 15587.5(14624.7-16625.3) | 80.8(75.8-86.2) | -0.32 (-0.33 to -0.31) | p<0.001 | 1141.9(759.8-1622.1) | 13.4 (8.9-19) | 2386.9(1537.9-3467.6) | 12.4(8-18) | -0.25 (-0.28 to -0.23) | p<0.001 |
| United States of America | 111262.1(101220.5-124379.3) | 201.1(182.9-224.8) | 67699.1(61711.2-75080.6) | 104.5(95.2-115.9) | -0.95 (-0.99 to -0.9) | p<0.001 | 15081(10269.8-20870.8) | 27.3(18.6-37.7) | 9153.7(6173.3-12630.5) | 14.1(9.5-19.5) | -1 (-1.04 to -0.96) | p<0.001 |
| United States Virgin Islands | 46.5(43.7-49.7) | 165.6(155.4-176.8) | 17.4(16.2-18.6) | 124.6(116.2-133.6) | -2.14 (-2.19 to -2.09) | p<0.001 | 7.2(4.9-10) | 25.6(17.4-35.8) | 2.7(1.8-3.7) | 19.1(12.8-26.6) | -2.12 (-2.17 to -2.07) | p<0.001 |
| Uruguay | 1728(1470.3-2075.4) | 225.4(191.8-270.8) | 1421.6(1220.5-1651.8) | 197.6(169.6-229.6) | -0.43 (-0.45 to -0.42) | p<0.001 | 227(144.1-329.5) | 29.6 (18.8-43) | 188.8(127.9-270) | 26.2(17.8-37.5) | -0.4 (-0.42 to -0.39) | p<0.001 |
| Uzbekistan | 13179.2(12265-14201.8) | 206.3 (192-222.3) | 13177.5 (12266.9-14405) | 164.5 (153.1-179.8) | -0.73 (-0.75 to -0.71) | p<0.001 | 2003.8(1387.8-2805.8) | 31.4(21.7-43.9) | 2007.1(1392.2-2896.9) | 25.1(17.4-36.2) | -0.72 (-0.75 to -0.7) | p<0.001 |
| Vanuatu | 42.9(39.3-47.3) | 90.7(83-99.9) | 81.2(74.7-88.9) | 86.6(79.7-94.8) | -0.15 (-0.23 to -0.08) | 0.002 | 6.6(4.5-9) | 14 (9.6-19.1) | 12.7(8.9-17.5) | 13.5(9.5-18.7) | -0.12 (-0.23 to -0.01) | 0.034 |
| Venezuela (Bolivarian Republic of) | 16040.4(15040.4-17125.4) | 267.7(251-285.8) | 14409.3(13310.6-15566.4) | 243.1(224.6-262.6) | -0.33 (-0.45 to -0.2) | p<0.001 | 2448.5(1647.1-3464.4) | 40.9(27.5-57.8) | 2207.1(1525.4-3021.7) | 37.2(25.7-51) | -0.34 (-0.49 to -0.15) | 0.002 |
| Viet Nam | 23616.3(22096.4-25187.5) | 109.6(102.6-116.9) | 22745.8(21177.4-24345.6) | 107.1(99.7-114.6) | -0.09 (-0.12 to -0.05) | p<0.001 | 3638.7(2406.1-5141.1) | 16.9(11.2-23.9) | 3502.4(2400.2-4980.5) | 16.5(11.3-23.4) | -0.06 (-0.1 to -0.02) | 0.002 |
| Yemen | 10045.7(9118.5-11199.9) | 238.4(216.4-265.8) | 39617.8(30305.3-52668.9) | 360(275.4-478.6) | 1.61 (1.39 to 1.79) | p<0.001 | 1534.9(1090.8-2046.1) | 36.4(25.9-48.6) | 6034(4252-8163.6) | 54.8(38.6-74.2) | 1.33 (1.2 to 1.46) | p<0.001 |
| Zambia | 2564.9(2421.6-2730.2) | 92.5(87.3-98.4) | 5231.9(4892.2-5597.6) | 79.3(74.1-84.8) | -0.5 (-0.52 to -0.48) | p<0.001 | 387(255.8-553.6) | 14(9.2-20) | 799(538.5-1144.5) | 12.1(8.2-17.3) | -0.45 (-0.48 to -0.42) | p<0.001 |
| Zimbabwe | 3203.4(3012.8-3431.6) | 89.2(83.9-95.5) | 4284.4(4008.9-4598.7) | 84(78.6-90.1) | -0.18 (-0.21 to -0.16) | p<0.001 | 492.4(336.7-710.2) | 13.7(9.4-19.8) | 658.7(437.1-906.9) | 12.9(8.6-17.8) | -0.19 (-0.22 to -0.15) | p<0.001 |

**Table S2. Global age-specific prevalence, and YLDs rate of TBI in both sexes, females, and males from 1990 to 2021**

| Measure | Age | Sex | Year | Rate | 95% Lower UI | 95% Upper UI | Measure | Age | Sex | Year | Rate | 95% Lower UI | 95% Upper UI |
| --- | --- | --- | --- | --- | --- | --- | --- | --- | --- | --- | --- | --- | --- |
| Prevalence | 10-14 years | Both | 1990 | 114.1 | 95.3 | 132.8 | YLDs | 10-14 years | Both | 1990 | 17.1 | 0 | 40.5 |
| Prevalence | 10-14 years | Female | 1990 | 91.5 | 91.1 | 91.8 | YLDs | 10-14 years | Female | 1990 | 13.6 | 13.5 | 13.8 |
| Prevalence | 10-14 years | Male | 1990 | 135.6 | 135.2 | 136 | YLDs | 10-14 years | Male | 1990 | 20.4 | 20.3 | 20.6 |
| Prevalence | 10-14 years | Both | 1991 | 115.1 | 96.3 | 133.9 | YLDs | 10-14 years | Both | 1991 | 17.3 | 0 | 41.2 |
| Prevalence | 10-14 years | Female | 1991 | 94.4 | 94 | 94.7 | YLDs | 10-14 years | Female | 1991 | 14.1 | 14 | 14.2 |
| Prevalence | 10-14 years | Male | 1991 | 134.9 | 134.5 | 135.3 | YLDs | 10-14 years | Male | 1991 | 20.3 | 20.2 | 20.5 |
| Prevalence | 10-14 years | Both | 1992 | 112.1 | 93.2 | 130.9 | YLDs | 10-14 years | Both | 1992 | 16.8 | 0 | 40.3 |
| Prevalence | 10-14 years | Female | 1992 | 90.6 | 90.3 | 91 | YLDs | 10-14 years | Female | 1992 | 13.5 | 13.4 | 13.6 |
| Prevalence | 10-14 years | Male | 1992 | 132.4 | 132 | 132.9 | YLDs | 10-14 years | Male | 1992 | 20 | 19.8 | 20.1 |
| Prevalence | 10-14 years | Both | 1993 | 110.8 | 91.9 | 129.7 | YLDs | 10-14 years | Both | 1993 | 16.6 | 0 | 40.2 |
| Prevalence | 10-14 years | Female | 1993 | 89.7 | 89.4 | 90.1 | YLDs | 10-14 years | Female | 1993 | 13.4 | 13.2 | 13.5 |
| Prevalence | 10-14 years | Male | 1993 | 130.7 | 130.3 | 131.2 | YLDs | 10-14 years | Male | 1993 | 19.7 | 19.6 | 19.9 |
| Prevalence | 10-14 years | Both | 1994 | 110.4 | 91.5 | 129.3 | YLDs | 10-14 years | Both | 1994 | 16.6 | 0 | 40.3 |
| Prevalence | 10-14 years | Female | 1994 | 89.4 | 89.1 | 89.8 | YLDs | 10-14 years | Female | 1994 | 13.3 | 13.2 | 13.5 |
| Prevalence | 10-14 years | Male | 1994 | 130.2 | 129.8 | 130.6 | YLDs | 10-14 years | Male | 1994 | 19.7 | 19.5 | 19.8 |
| Prevalence | 10-14 years | Both | 1995 | 108.8 | 89.9 | 127.7 | YLDs | 10-14 years | Both | 1995 | 16.3 | 0 | 40 |
| Prevalence | 10-14 years | Female | 1995 | 88.2 | 87.8 | 88.5 | YLDs | 10-14 years | Female | 1995 | 13.1 | 13 | 13.3 |
| Prevalence | 10-14 years | Male | 1995 | 128.3 | 127.9 | 128.7 | YLDs | 10-14 years | Male | 1995 | 19.4 | 19.2 | 19.5 |
| Prevalence | 10-14 years | Both | 1996 | 107.5 | 88.6 | 126.5 | YLDs | 10-14 years | Both | 1996 | 16.1 | 0 | 39.8 |
| Prevalence | 10-14 years | Female | 1996 | 87.2 | 86.8 | 87.5 | YLDs | 10-14 years | Female | 1996 | 13 | 12.8 | 13.1 |
| Prevalence | 10-14 years | Male | 1996 | 126.7 | 126.3 | 127.1 | YLDs | 10-14 years | Male | 1996 | 19.1 | 19 | 19.3 |
| Prevalence | 10-14 years | Both | 1997 | 106.4 | 87.4 | 125.4 | YLDs | 10-14 years | Both | 1997 | 16 | 0 | 39.7 |
| Prevalence | 10-14 years | Female | 1997 | 86.2 | 85.9 | 86.6 | YLDs | 10-14 years | Female | 1997 | 12.9 | 12.7 | 13 |
| Prevalence | 10-14 years | Male | 1997 | 125.3 | 124.9 | 125.7 | YLDs | 10-14 years | Male | 1997 | 18.9 | 18.8 | 19.1 |
| Prevalence | 10-14 years | Both | 1998 | 105.5 | 86.5 | 124.6 | YLDs | 10-14 years | Both | 1998 | 15.9 | 0 | 39.7 |
| Prevalence | 10-14 years | Female | 1998 | 85.8 | 85.5 | 86.1 | YLDs | 10-14 years | Female | 1998 | 12.8 | 12.7 | 12.9 |
| Prevalence | 10-14 years | Male | 1998 | 124.1 | 123.7 | 124.5 | YLDs | 10-14 years | Male | 1998 | 18.7 | 18.6 | 18.9 |
| Prevalence | 10-14 years | Both | 1999 | 104.5 | 85.4 | 123.5 | YLDs | 10-14 years | Both | 1999 | 15.7 | 0 | 39.7 |
| Prevalence | 10-14 years | Female | 1999 | 85 | 84.7 | 85.4 | YLDs | 10-14 years | Female | 1999 | 12.7 | 12.6 | 12.8 |
| Prevalence | 10-14 years | Male | 1999 | 122.7 | 122.3 | 123.1 | YLDs | 10-14 years | Male | 1999 | 18.5 | 18.4 | 18.7 |
| Prevalence | 10-14 years | Both | 2000 | 102.4 | 83.3 | 121.5 | YLDs | 10-14 years | Both | 2000 | 15.4 | 0 | 39.2 |
| Prevalence | 10-14 years | Female | 2000 | 83 | 82.7 | 83.3 | YLDs | 10-14 years | Female | 2000 | 12.4 | 12.3 | 12.5 |
| Prevalence | 10-14 years | Male | 2000 | 120.6 | 120.3 | 121 | YLDs | 10-14 years | Male | 2000 | 18.2 | 18.1 | 18.4 |
| Prevalence | 10-14 years | Both | 2001 | 102.1 | 82.9 | 121.2 | YLDs | 10-14 years | Both | 2001 | 15.3 | 0 | 39.5 |
| Prevalence | 10-14 years | Female | 2001 | 82.8 | 82.4 | 83.1 | YLDs | 10-14 years | Female | 2001 | 12.4 | 12.2 | 12.5 |
| Prevalence | 10-14 years | Male | 2001 | 120.1 | 119.7 | 120.5 | YLDs | 10-14 years | Male | 2001 | 18.1 | 18 | 18.3 |
| Prevalence | 10-14 years | Both | 2002 | 99.1 | 79.9 | 118.3 | YLDs | 10-14 years | Both | 2002 | 14.9 | 0 | 38.8 |
| Prevalence | 10-14 years | Female | 2002 | 79.8 | 79.5 | 80.2 | YLDs | 10-14 years | Female | 2002 | 11.9 | 11.8 | 12 |
| Prevalence | 10-14 years | Male | 2002 | 117.1 | 116.7 | 117.4 | YLDs | 10-14 years | Male | 2002 | 17.7 | 17.5 | 17.8 |
| Prevalence | 10-14 years | Both | 2003 | 96.4 | 77.2 | 115.7 | YLDs | 10-14 years | Both | 2003 | 14.5 | 0 | 38.3 |
| Prevalence | 10-14 years | Female | 2003 | 77.5 | 77.1 | 77.8 | YLDs | 10-14 years | Female | 2003 | 11.6 | 11.4 | 11.7 |
| Prevalence | 10-14 years | Male | 2003 | 114.1 | 113.8 | 114.5 | YLDs | 10-14 years | Male | 2003 | 17.2 | 17.1 | 17.3 |
| Prevalence | 10-14 years | Both | 2004 | 95.6 | 76.3 | 114.9 | YLDs | 10-14 years | Both | 2004 | 14.4 | 0 | 38.7 |
| Prevalence | 10-14 years | Female | 2004 | 77.5 | 77.2 | 77.8 | YLDs | 10-14 years | Female | 2004 | 11.6 | 11.5 | 11.7 |
| Prevalence | 10-14 years | Male | 2004 | 112.4 | 112.1 | 112.8 | YLDs | 10-14 years | Male | 2004 | 17 | 16.8 | 17.1 |
| Prevalence | 10-14 years | Both | 2005 | 93.3 | 74 | 112.6 | YLDs | 10-14 years | Both | 2005 | 14 | 0 | 38.2 |
| Prevalence | 10-14 years | Female | 2005 | 75.4 | 75.1 | 75.7 | YLDs | 10-14 years | Female | 2005 | 11.3 | 11.1 | 11.4 |
| Prevalence | 10-14 years | Male | 2005 | 110 | 109.6 | 110.3 | YLDs | 10-14 years | Male | 2005 | 16.6 | 16.4 | 16.7 |
| Prevalence | 10-14 years | Both | 2006 | 90.4 | 71 | 109.8 | YLDs | 10-14 years | Both | 2006 | 13.6 | 0 | 37.3 |
| Prevalence | 10-14 years | Female | 2006 | 72.7 | 72.4 | 73 | YLDs | 10-14 years | Female | 2006 | 10.8 | 10.7 | 10.9 |
| Prevalence | 10-14 years | Male | 2006 | 106.8 | 106.5 | 107.2 | YLDs | 10-14 years | Male | 2006 | 16.1 | 16 | 16.2 |
| Prevalence | 10-14 years | Both | 2007 | 89.4 | 70 | 108.9 | YLDs | 10-14 years | Both | 2007 | 13.4 | 0 | 37.2 |
| Prevalence | 10-14 years | Female | 2007 | 71.9 | 71.6 | 72.2 | YLDs | 10-14 years | Female | 2007 | 10.7 | 10.6 | 10.8 |
| Prevalence | 10-14 years | Male | 2007 | 105.8 | 105.4 | 106.1 | YLDs | 10-14 years | Male | 2007 | 15.9 | 15.8 | 16.1 |
| Prevalence | 10-14 years | Both | 2008 | 90.8 | 71.4 | 110.2 | YLDs | 10-14 years | Both | 2008 | 13.6 | 0 | 38.2 |
| Prevalence | 10-14 years | Female | 2008 | 74.5 | 74.2 | 74.8 | YLDs | 10-14 years | Female | 2008 | 11.1 | 11 | 11.2 |
| Prevalence | 10-14 years | Male | 2008 | 106 | 105.6 | 106.3 | YLDs | 10-14 years | Male | 2008 | 16 | 15.8 | 16.1 |
| Prevalence | 10-14 years | Both | 2009 | 88.9 | 69.4 | 108.3 | YLDs | 10-14 years | Both | 2009 | 13.3 | 0 | 37.4 |
| Prevalence | 10-14 years | Female | 2009 | 72 | 71.7 | 72.3 | YLDs | 10-14 years | Female | 2009 | 10.7 | 10.6 | 10.8 |
| Prevalence | 10-14 years | Male | 2009 | 104.7 | 104.3 | 105 | YLDs | 10-14 years | Male | 2009 | 15.8 | 15.6 | 15.9 |
| Prevalence | 10-14 years | Both | 2010 | 89.3 | 69.9 | 108.8 | YLDs | 10-14 years | Both | 2010 | 13.4 | 0 | 38 |
| Prevalence | 10-14 years | Female | 2010 | 73.2 | 72.9 | 73.5 | YLDs | 10-14 years | Female | 2010 | 10.9 | 10.8 | 11 |
| Prevalence | 10-14 years | Male | 2010 | 104.4 | 104.1 | 104.8 | YLDs | 10-14 years | Male | 2010 | 15.7 | 15.6 | 15.8 |
| Prevalence | 10-14 years | Both | 2011 | 86.9 | 67.4 | 106.4 | YLDs | 10-14 years | Both | 2011 | 13 | 0 | 37.3 |
| Prevalence | 10-14 years | Female | 2011 | 70.6 | 70.3 | 70.9 | YLDs | 10-14 years | Female | 2011 | 10.5 | 10.3 | 10.6 |
| Prevalence | 10-14 years | Male | 2011 | 102.1 | 101.8 | 102.5 | YLDs | 10-14 years | Male | 2011 | 15.4 | 15.2 | 15.5 |
| Prevalence | 10-14 years | Both | 2012 | 84.5 | 64.9 | 104.1 | YLDs | 10-14 years | Both | 2012 | 12.6 | 0 | 37 |
| Prevalence | 10-14 years | Female | 2012 | 68.6 | 68.3 | 68.9 | YLDs | 10-14 years | Female | 2012 | 10.2 | 10.1 | 10.3 |
| Prevalence | 10-14 years | Male | 2012 | 99.4 | 99 | 99.7 | YLDs | 10-14 years | Male | 2012 | 15 | 14.8 | 15.1 |
| Prevalence | 10-14 years | Both | 2013 | 81.8 | 62.1 | 101.5 | YLDs | 10-14 years | Both | 2013 | 12.3 | 0 | 36.6 |
| Prevalence | 10-14 years | Female | 2013 | 66.4 | 66.1 | 66.7 | YLDs | 10-14 years | Female | 2013 | 9.9 | 9.8 | 10 |
| Prevalence | 10-14 years | Male | 2013 | 96.1 | 95.8 | 96.5 | YLDs | 10-14 years | Male | 2013 | 14.5 | 14.4 | 14.6 |
| Prevalence | 10-14 years | Both | 2014 | 79.6 | 59.8 | 99.3 | YLDs | 10-14 years | Both | 2014 | 11.9 | 0 | 36.3 |
| Prevalence | 10-14 years | Female | 2014 | 64.6 | 64.3 | 64.9 | YLDs | 10-14 years | Female | 2014 | 9.6 | 9.5 | 9.7 |
| Prevalence | 10-14 years | Male | 2014 | 93.6 | 93.3 | 93.9 | YLDs | 10-14 years | Male | 2014 | 14.1 | 14 | 14.2 |
| Prevalence | 10-14 years | Both | 2015 | 77.8 | 58 | 97.6 | YLDs | 10-14 years | Both | 2015 | 11.7 | 0 | 36.1 |
| Prevalence | 10-14 years | Female | 2015 | 63.2 | 62.9 | 63.5 | YLDs | 10-14 years | Female | 2015 | 9.4 | 9.3 | 9.5 |
| Prevalence | 10-14 years | Male | 2015 | 91.4 | 91.1 | 91.8 | YLDs | 10-14 years | Male | 2015 | 13.8 | 13.7 | 13.9 |
| Prevalence | 10-14 years | Both | 2016 | 76 | 56.2 | 95.9 | YLDs | 10-14 years | Both | 2016 | 11.4 | 0 | 35.9 |
| Prevalence | 10-14 years | Female | 2016 | 61.6 | 61.3 | 61.9 | YLDs | 10-14 years | Female | 2016 | 9.1 | 9 | 9.2 |
| Prevalence | 10-14 years | Male | 2016 | 89.5 | 89.2 | 89.9 | YLDs | 10-14 years | Male | 2016 | 13.5 | 13.4 | 13.6 |
| Prevalence | 10-14 years | Both | 2017 | 74.8 | 54.9 | 94.7 | YLDs | 10-14 years | Both | 2017 | 11.2 | 0 | 35.7 |
| Prevalence | 10-14 years | Female | 2017 | 60.6 | 60.3 | 60.8 | YLDs | 10-14 years | Female | 2017 | 9 | 8.9 | 9.1 |
| Prevalence | 10-14 years | Male | 2017 | 88.1 | 87.8 | 88.4 | YLDs | 10-14 years | Male | 2017 | 13.3 | 13.2 | 13.4 |
| Prevalence | 10-14 years | Both | 2018 | 74.5 | 54.6 | 94.5 | YLDs | 10-14 years | Both | 2018 | 11.2 | 0 | 36 |
| Prevalence | 10-14 years | Female | 2018 | 60.5 | 60.2 | 60.7 | YLDs | 10-14 years | Female | 2018 | 9 | 8.9 | 9.1 |
| Prevalence | 10-14 years | Male | 2018 | 87.7 | 87.4 | 88 | YLDs | 10-14 years | Male | 2018 | 13.2 | 13.1 | 13.3 |
| Prevalence | 10-14 years | Both | 2019 | 73.4 | 53.4 | 93.4 | YLDs | 10-14 years | Both | 2019 | 11 | 0 | 35.5 |
| Prevalence | 10-14 years | Female | 2019 | 59.3 | 59 | 59.6 | YLDs | 10-14 years | Female | 2019 | 8.8 | 8.7 | 8.9 |
| Prevalence | 10-14 years | Male | 2019 | 86.6 | 86.3 | 86.9 | YLDs | 10-14 years | Male | 2019 | 13 | 12.9 | 13.1 |
| Prevalence | 10-14 years | Both | 2020 | 73.8 | 53.8 | 93.7 | YLDs | 10-14 years | Both | 2020 | 11 | 0 | 35.8 |
| Prevalence | 10-14 years | Female | 2020 | 59.5 | 59.3 | 59.8 | YLDs | 10-14 years | Female | 2020 | 8.8 | 8.7 | 8.9 |
| Prevalence | 10-14 years | Male | 2020 | 87.1 | 86.8 | 87.4 | YLDs | 10-14 years | Male | 2020 | 13.1 | 13 | 13.2 |
| Prevalence | 10-14 years | Both | 2021 | 73.4 | 53.4 | 93.3 | YLDs | 10-14 years | Both | 2021 | 11 | 0 | 35.6 |
| Prevalence | 10-14 years | Female | 2021 | 59 | 58.8 | 59.3 | YLDs | 10-14 years | Female | 2021 | 8.8 | 8.7 | 8.9 |
| Prevalence | 10-14 years | Male | 2021 | 86.8 | 86.5 | 87.1 | YLDs | 10-14 years | Male | 2021 | 13.1 | 13 | 13.2 |
| Prevalence | 15-19 years | Both | 1990 | 181.6 | 163.9 | 199.2 | YLDs | 15-19 years | Both | 1990 | 27.4 | 7.2 | 49.8 |
| Prevalence | 15-19 years | Female | 1990 | 125.6 | 125.1 | 126 | YLDs | 15-19 years | Female | 1990 | 18.7 | 18.5 | 18.9 |
| Prevalence | 15-19 years | Male | 1990 | 235.8 | 235.2 | 236.4 | YLDs | 15-19 years | Male | 1990 | 35.8 | 35.6 | 36.1 |
| Prevalence | 15-19 years | Both | 1991 | 180.1 | 162.4 | 197.7 | YLDs | 15-19 years | Both | 1991 | 27.2 | 6.9 | 49.7 |
| Prevalence | 15-19 years | Female | 1991 | 126.2 | 125.8 | 126.6 | YLDs | 15-19 years | Female | 1991 | 18.8 | 18.6 | 19 |
| Prevalence | 15-19 years | Male | 1991 | 232.3 | 231.7 | 232.9 | YLDs | 15-19 years | Male | 1991 | 35.3 | 35.1 | 35.6 |
| Prevalence | 15-19 years | Both | 1992 | 177.7 | 160 | 195.4 | YLDs | 15-19 years | Both | 1992 | 26.8 | 6.6 | 49.3 |
| Prevalence | 15-19 years | Female | 1992 | 124.1 | 123.7 | 124.6 | YLDs | 15-19 years | Female | 1992 | 18.5 | 18.3 | 18.6 |
| Prevalence | 15-19 years | Male | 1992 | 229.8 | 229.2 | 230.3 | YLDs | 15-19 years | Male | 1992 | 34.9 | 34.7 | 35.1 |
| Prevalence | 15-19 years | Both | 1993 | 175.3 | 157.6 | 193.1 | YLDs | 15-19 years | Both | 1993 | 26.5 | 6.4 | 49 |
| Prevalence | 15-19 years | Female | 1993 | 123.2 | 122.8 | 123.7 | YLDs | 15-19 years | Female | 1993 | 18.3 | 18.2 | 18.5 |
| Prevalence | 15-19 years | Male | 1993 | 226 | 225.4 | 226.5 | YLDs | 15-19 years | Male | 1993 | 34.4 | 34.1 | 34.6 |
| Prevalence | 15-19 years | Both | 1994 | 175 | 157.2 | 192.7 | YLDs | 15-19 years | Both | 1994 | 26.4 | 6.3 | 49 |
| Prevalence | 15-19 years | Female | 1994 | 123.2 | 122.8 | 123.6 | YLDs | 15-19 years | Female | 1994 | 18.3 | 18.2 | 18.5 |
| Prevalence | 15-19 years | Male | 1994 | 225.3 | 224.7 | 225.8 | YLDs | 15-19 years | Male | 1994 | 34.3 | 34.1 | 34.5 |
| Prevalence | 15-19 years | Both | 1995 | 173.1 | 155.3 | 190.9 | YLDs | 15-19 years | Both | 1995 | 26.1 | 6.1 | 48.7 |
| Prevalence | 15-19 years | Female | 1995 | 122 | 121.6 | 122.4 | YLDs | 15-19 years | Female | 1995 | 18.1 | 18 | 18.3 |
| Prevalence | 15-19 years | Male | 1995 | 222.7 | 222.1 | 223.3 | YLDs | 15-19 years | Male | 1995 | 33.9 | 33.6 | 34.1 |
| Prevalence | 15-19 years | Both | 1996 | 172.8 | 155 | 190.6 | YLDs | 15-19 years | Both | 1996 | 26.1 | 6.1 | 48.7 |
| Prevalence | 15-19 years | Female | 1996 | 121.2 | 120.8 | 121.6 | YLDs | 15-19 years | Female | 1996 | 18 | 17.9 | 18.2 |
| Prevalence | 15-19 years | Male | 1996 | 222.7 | 222.2 | 223.3 | YLDs | 15-19 years | Male | 1996 | 33.9 | 33.7 | 34.1 |
| Prevalence | 15-19 years | Both | 1997 | 171.3 | 153.5 | 189.1 | YLDs | 15-19 years | Both | 1997 | 25.9 | 6 | 48.5 |
| Prevalence | 15-19 years | Female | 1997 | 120.2 | 119.8 | 120.6 | YLDs | 15-19 years | Female | 1997 | 17.9 | 17.7 | 18 |
| Prevalence | 15-19 years | Male | 1997 | 220.8 | 220.2 | 221.3 | YLDs | 15-19 years | Male | 1997 | 33.6 | 33.4 | 33.8 |
| Prevalence | 15-19 years | Both | 1998 | 170.5 | 152.7 | 188.3 | YLDs | 15-19 years | Both | 1998 | 25.8 | 5.9 | 48.4 |
| Prevalence | 15-19 years | Female | 1998 | 119.3 | 118.9 | 119.7 | YLDs | 15-19 years | Female | 1998 | 17.7 | 17.6 | 17.9 |
| Prevalence | 15-19 years | Male | 1998 | 219.9 | 219.3 | 220.4 | YLDs | 15-19 years | Male | 1998 | 33.5 | 33.3 | 33.7 |
| Prevalence | 15-19 years | Both | 1999 | 169.1 | 151.3 | 187 | YLDs | 15-19 years | Both | 1999 | 25.6 | 5.8 | 48.2 |
| Prevalence | 15-19 years | Female | 1999 | 118.4 | 118 | 118.8 | YLDs | 15-19 years | Female | 1999 | 17.6 | 17.5 | 17.8 |
| Prevalence | 15-19 years | Male | 1999 | 218 | 217.4 | 218.5 | YLDs | 15-19 years | Male | 1999 | 33.3 | 33 | 33.5 |
| Prevalence | 15-19 years | Both | 2000 | 167.8 | 149.9 | 185.6 | YLDs | 15-19 years | Both | 2000 | 25.4 | 5.6 | 48.1 |
| Prevalence | 15-19 years | Female | 2000 | 117 | 116.6 | 117.4 | YLDs | 15-19 years | Female | 2000 | 17.4 | 17.3 | 17.6 |
| Prevalence | 15-19 years | Male | 2000 | 216.5 | 215.9 | 217 | YLDs | 15-19 years | Male | 2000 | 33 | 32.8 | 33.2 |
| Prevalence | 15-19 years | Both | 2001 | 163.8 | 145.9 | 181.7 | YLDs | 15-19 years | Both | 2001 | 24.8 | 5.2 | 47.5 |
| Prevalence | 15-19 years | Female | 2001 | 115 | 114.7 | 115.4 | YLDs | 15-19 years | Female | 2001 | 17.1 | 17 | 17.3 |
| Prevalence | 15-19 years | Male | 2001 | 210.5 | 210 | 211.1 | YLDs | 15-19 years | Male | 2001 | 32.1 | 31.9 | 32.3 |
| Prevalence | 15-19 years | Both | 2002 | 160 | 142 | 178 | YLDs | 15-19 years | Both | 2002 | 24.2 | 4.8 | 47 |
| Prevalence | 15-19 years | Female | 2002 | 112.2 | 111.8 | 112.6 | YLDs | 15-19 years | Female | 2002 | 16.7 | 16.6 | 16.9 |
| Prevalence | 15-19 years | Male | 2002 | 205.8 | 205.3 | 206.3 | YLDs | 15-19 years | Male | 2002 | 31.4 | 31.2 | 31.6 |
| Prevalence | 15-19 years | Both | 2003 | 155.9 | 137.9 | 174 | YLDs | 15-19 years | Both | 2003 | 23.6 | 4.4 | 46.4 |
| Prevalence | 15-19 years | Female | 2003 | 109.4 | 109 | 109.8 | YLDs | 15-19 years | Female | 2003 | 16.3 | 16.2 | 16.4 |
| Prevalence | 15-19 years | Male | 2003 | 200.5 | 200 | 201 | YLDs | 15-19 years | Male | 2003 | 30.6 | 30.4 | 30.8 |
| Prevalence | 15-19 years | Both | 2004 | 153.2 | 135.1 | 171.3 | YLDs | 15-19 years | Both | 2004 | 23.2 | 4 | 46.2 |
| Prevalence | 15-19 years | Female | 2004 | 108 | 107.6 | 108.3 | YLDs | 15-19 years | Female | 2004 | 16.1 | 16 | 16.3 |
| Prevalence | 15-19 years | Male | 2004 | 196.5 | 196 | 196.9 | YLDs | 15-19 years | Male | 2004 | 30 | 29.8 | 30.2 |
| Prevalence | 15-19 years | Both | 2005 | 149.3 | 131.1 | 167.5 | YLDs | 15-19 years | Both | 2005 | 22.6 | 3.6 | 45.5 |
| Prevalence | 15-19 years | Female | 2005 | 105 | 104.7 | 105.4 | YLDs | 15-19 years | Female | 2005 | 15.7 | 15.5 | 15.8 |
| Prevalence | 15-19 years | Male | 2005 | 191.6 | 191.1 | 192.1 | YLDs | 15-19 years | Male | 2005 | 29.3 | 29.1 | 29.4 |
| Prevalence | 15-19 years | Both | 2006 | 148.6 | 130.4 | 166.8 | YLDs | 15-19 years | Both | 2006 | 22.5 | 3.5 | 45.5 |
| Prevalence | 15-19 years | Female | 2006 | 104.5 | 104.1 | 104.8 | YLDs | 15-19 years | Female | 2006 | 15.6 | 15.4 | 15.7 |
| Prevalence | 15-19 years | Male | 2006 | 190.8 | 190.3 | 191.3 | YLDs | 15-19 years | Male | 2006 | 29.1 | 28.9 | 29.3 |
| Prevalence | 15-19 years | Both | 2007 | 146.7 | 128.5 | 165 | YLDs | 15-19 years | Both | 2007 | 22.2 | 3.3 | 45.2 |
| Prevalence | 15-19 years | Female | 2007 | 102.9 | 102.5 | 103.3 | YLDs | 15-19 years | Female | 2007 | 15.3 | 15.2 | 15.4 |
| Prevalence | 15-19 years | Male | 2007 | 188.6 | 188.1 | 189 | YLDs | 15-19 years | Male | 2007 | 28.8 | 28.6 | 28.9 |
| Prevalence | 15-19 years | Both | 2008 | 146.8 | 128.6 | 165 | YLDs | 15-19 years | Both | 2008 | 22.2 | 3.3 | 45.4 |
| Prevalence | 15-19 years | Female | 2008 | 103.8 | 103.4 | 104.1 | YLDs | 15-19 years | Female | 2008 | 15.5 | 15.3 | 15.6 |
| Prevalence | 15-19 years | Male | 2008 | 187.8 | 187.4 | 188.3 | YLDs | 15-19 years | Male | 2008 | 28.7 | 28.5 | 28.9 |
| Prevalence | 15-19 years | Both | 2009 | 145.1 | 126.8 | 163.3 | YLDs | 15-19 years | Both | 2009 | 22 | 3.1 | 45 |
| Prevalence | 15-19 years | Female | 2009 | 101.3 | 101 | 101.7 | YLDs | 15-19 years | Female | 2009 | 15.1 | 14.9 | 15.2 |
| Prevalence | 15-19 years | Male | 2009 | 186.7 | 186.2 | 187.2 | YLDs | 15-19 years | Male | 2009 | 28.5 | 28.3 | 28.7 |
| Prevalence | 15-19 years | Both | 2010 | 144 | 125.7 | 162.3 | YLDs | 15-19 years | Both | 2010 | 21.8 | 3 | 45 |
| Prevalence | 15-19 years | Female | 2010 | 101.3 | 100.9 | 101.7 | YLDs | 15-19 years | Female | 2010 | 15.1 | 15 | 15.2 |
| Prevalence | 15-19 years | Male | 2010 | 184.6 | 184.1 | 185.1 | YLDs | 15-19 years | Male | 2010 | 28.2 | 28 | 28.4 |
| Prevalence | 15-19 years | Both | 2011 | 139.7 | 121.4 | 158.1 | YLDs | 15-19 years | Both | 2011 | 21.1 | 2.6 | 44.2 |
| Prevalence | 15-19 years | Female | 2011 | 97.8 | 97.4 | 98.1 | YLDs | 15-19 years | Female | 2011 | 14.5 | 14.4 | 14.7 |
| Prevalence | 15-19 years | Male | 2011 | 179.6 | 179.2 | 180.1 | YLDs | 15-19 years | Male | 2011 | 27.4 | 27.2 | 27.6 |
| Prevalence | 15-19 years | Both | 2012 | 137.2 | 118.8 | 155.6 | YLDs | 15-19 years | Both | 2012 | 20.8 | 2.3 | 44 |
| Prevalence | 15-19 years | Female | 2012 | 95.8 | 95.5 | 96.2 | YLDs | 15-19 years | Female | 2012 | 14.3 | 14.1 | 14.4 |
| Prevalence | 15-19 years | Male | 2012 | 176.6 | 176.2 | 177.1 | YLDs | 15-19 years | Male | 2012 | 27 | 26.8 | 27.2 |
| Prevalence | 15-19 years | Both | 2013 | 134 | 115.6 | 152.5 | YLDs | 15-19 years | Both | 2013 | 20.3 | 2 | 43.5 |
| Prevalence | 15-19 years | Female | 2013 | 93.7 | 93.4 | 94.1 | YLDs | 15-19 years | Female | 2013 | 13.9 | 13.8 | 14.1 |
| Prevalence | 15-19 years | Male | 2013 | 172.3 | 171.8 | 172.8 | YLDs | 15-19 years | Male | 2013 | 26.3 | 26.1 | 26.5 |
| Prevalence | 15-19 years | Both | 2014 | 132.2 | 113.7 | 150.8 | YLDs | 15-19 years | Both | 2014 | 20 | 1.8 | 43.4 |
| Prevalence | 15-19 years | Female | 2014 | 91.7 | 91.4 | 92.1 | YLDs | 15-19 years | Female | 2014 | 13.6 | 13.5 | 13.7 |
| Prevalence | 15-19 years | Male | 2014 | 170.7 | 170.3 | 171.2 | YLDs | 15-19 years | Male | 2014 | 26.1 | 26 | 26.3 |
| Prevalence | 15-19 years | Both | 2015 | 129.7 | 111.1 | 148.2 | YLDs | 15-19 years | Both | 2015 | 19.6 | 1.5 | 43 |
| Prevalence | 15-19 years | Female | 2015 | 89.9 | 89.6 | 90.2 | YLDs | 15-19 years | Female | 2015 | 13.3 | 13.2 | 13.5 |
| Prevalence | 15-19 years | Male | 2015 | 167.4 | 167 | 167.9 | YLDs | 15-19 years | Male | 2015 | 25.6 | 25.5 | 25.8 |
| Prevalence | 15-19 years | Both | 2016 | 127.8 | 109.2 | 146.4 | YLDs | 15-19 years | Both | 2016 | 19.3 | 1.3 | 42.8 |
| Prevalence | 15-19 years | Female | 2016 | 88.3 | 87.9 | 88.6 | YLDs | 15-19 years | Female | 2016 | 13.1 | 13 | 13.2 |
| Prevalence | 15-19 years | Male | 2016 | 165.2 | 164.8 | 165.7 | YLDs | 15-19 years | Male | 2016 | 25.3 | 25.1 | 25.4 |
| Prevalence | 15-19 years | Both | 2017 | 125.8 | 107.1 | 144.4 | YLDs | 15-19 years | Both | 2017 | 19 | 1.1 | 42.5 |
| Prevalence | 15-19 years | Female | 2017 | 86.7 | 86.4 | 87 | YLDs | 15-19 years | Female | 2017 | 12.8 | 12.7 | 13 |
| Prevalence | 15-19 years | Male | 2017 | 162.8 | 162.4 | 163.3 | YLDs | 15-19 years | Male | 2017 | 24.9 | 24.7 | 25.1 |
| Prevalence | 15-19 years | Both | 2018 | 123 | 104.3 | 141.7 | YLDs | 15-19 years | Both | 2018 | 18.6 | 0.8 | 42 |
| Prevalence | 15-19 years | Female | 2018 | 85 | 84.6 | 85.3 | YLDs | 15-19 years | Female | 2018 | 12.6 | 12.5 | 12.7 |
| Prevalence | 15-19 years | Male | 2018 | 159.1 | 158.6 | 159.5 | YLDs | 15-19 years | Male | 2018 | 24.3 | 24.2 | 24.5 |
| Prevalence | 15-19 years | Both | 2019 | 121.9 | 103.2 | 140.6 | YLDs | 15-19 years | Both | 2019 | 18.4 | 0.7 | 41.9 |
| Prevalence | 15-19 years | Female | 2019 | 84.4 | 84.1 | 84.8 | YLDs | 15-19 years | Female | 2019 | 12.5 | 12.4 | 12.6 |
| Prevalence | 15-19 years | Male | 2019 | 157.4 | 157 | 157.8 | YLDs | 15-19 years | Male | 2019 | 24 | 23.9 | 24.2 |
| Prevalence | 15-19 years | Both | 2020 | 121.4 | 102.6 | 140.1 | YLDs | 15-19 years | Both | 2020 | 18.3 | 0.5 | 41.9 |
| Prevalence | 15-19 years | Female | 2020 | 84.7 | 84.3 | 85 | YLDs | 15-19 years | Female | 2020 | 12.5 | 12.4 | 12.6 |
| Prevalence | 15-19 years | Male | 2020 | 156.2 | 155.7 | 156.6 | YLDs | 15-19 years | Male | 2020 | 23.8 | 23.6 | 24 |
| Prevalence | 15-19 years | Both | 2021 | 120.6 | 101.9 | 139.3 | YLDs | 15-19 years | Both | 2021 | 18.2 | 0.4 | 41.7 |
| Prevalence | 15-19 years | Female | 2021 | 84.3 | 84 | 84.6 | YLDs | 15-19 years | Female | 2021 | 12.5 | 12.3 | 12.6 |
| Prevalence | 15-19 years | Male | 2021 | 155 | 154.6 | 155.5 | YLDs | 15-19 years | Male | 2021 | 23.7 | 23.5 | 23.8 |
| Prevalence | 20-24 years | Both | 1990 | 285.8 | 269.2 | 302.3 | YLDs | 20-24 years | Both | 1990 | 43.2 | 21.8 | 43.2 |
| Prevalence | 20-24 years | Female | 1990 | 169.7 | 169.2 | 170.2 | YLDs | 20-24 years | Female | 1990 | 25.2 | 25 | 25.2 |
| Prevalence | 20-24 years | Male | 1990 | 400 | 399.2 | 400.8 | YLDs | 20-24 years | Male | 1990 | 60.8 | 60.5 | 60.8 |
| Prevalence | 20-24 years | Both | 1991 | 282.9 | 266.3 | 299.5 | YLDs | 20-24 years | Both | 1991 | 42.7 | 21.3 | 42.7 |
| Prevalence | 20-24 years | Female | 1991 | 170 | 169.5 | 170.5 | YLDs | 20-24 years | Female | 1991 | 25.3 | 25.1 | 25.3 |
| Prevalence | 20-24 years | Male | 1991 | 393.7 | 392.9 | 394.5 | YLDs | 20-24 years | Male | 1991 | 59.9 | 59.6 | 59.9 |
| Prevalence | 20-24 years | Both | 1992 | 279 | 262.4 | 295.6 | YLDs | 20-24 years | Both | 1992 | 42.1 | 20.7 | 42.1 |
| Prevalence | 20-24 years | Female | 1992 | 168 | 167.5 | 168.5 | YLDs | 20-24 years | Female | 1992 | 24.9 | 24.7 | 24.9 |
| Prevalence | 20-24 years | Male | 1992 | 387.7 | 387 | 388.5 | YLDs | 20-24 years | Male | 1992 | 59 | 58.7 | 59 |
| Prevalence | 20-24 years | Both | 1993 | 275.6 | 259 | 292.3 | YLDs | 20-24 years | Both | 1993 | 41.6 | 20.1 | 41.6 |
| Prevalence | 20-24 years | Female | 1993 | 167 | 166.5 | 167.5 | YLDs | 20-24 years | Female | 1993 | 24.8 | 24.6 | 24.8 |
| Prevalence | 20-24 years | Male | 1993 | 382.2 | 381.4 | 382.9 | YLDs | 20-24 years | Male | 1993 | 58.2 | 57.9 | 58.2 |
| Prevalence | 20-24 years | Both | 1994 | 273.7 | 257 | 290.3 | YLDs | 20-24 years | Both | 1994 | 41.4 | 19.8 | 41.4 |
| Prevalence | 20-24 years | Female | 1994 | 166.8 | 166.3 | 167.3 | YLDs | 20-24 years | Female | 1994 | 24.8 | 24.6 | 24.8 |
| Prevalence | 20-24 years | Male | 1994 | 378.9 | 378.2 | 379.7 | YLDs | 20-24 years | Male | 1994 | 57.8 | 57.5 | 57.8 |
| Prevalence | 20-24 years | Both | 1995 | 270.7 | 254 | 287.4 | YLDs | 20-24 years | Both | 1995 | 40.9 | 19.4 | 40.9 |
| Prevalence | 20-24 years | Female | 1995 | 165.5 | 165 | 166 | YLDs | 20-24 years | Female | 1995 | 24.6 | 24.4 | 24.6 |
| Prevalence | 20-24 years | Male | 1995 | 374.6 | 373.9 | 375.4 | YLDs | 20-24 years | Male | 1995 | 57.1 | 56.8 | 57.1 |
| Prevalence | 20-24 years | Both | 1996 | 268.9 | 252.2 | 285.6 | YLDs | 20-24 years | Both | 1996 | 40.7 | 19.1 | 40.7 |
| Prevalence | 20-24 years | Female | 1996 | 164.7 | 164.2 | 165.2 | YLDs | 20-24 years | Female | 1996 | 24.4 | 24.3 | 24.4 |
| Prevalence | 20-24 years | Male | 1996 | 372.2 | 371.5 | 373 | YLDs | 20-24 years | Male | 1996 | 56.8 | 56.5 | 56.8 |
| Prevalence | 20-24 years | Both | 1997 | 267 | 250.3 | 283.7 | YLDs | 20-24 years | Both | 1997 | 40.4 | 18.8 | 40.4 |
| Prevalence | 20-24 years | Female | 1997 | 163.8 | 163.3 | 164.3 | YLDs | 20-24 years | Female | 1997 | 24.3 | 24.1 | 24.3 |
| Prevalence | 20-24 years | Male | 1997 | 369.7 | 369 | 370.4 | YLDs | 20-24 years | Male | 1997 | 56.4 | 56.1 | 56.4 |
| Prevalence | 20-24 years | Both | 1998 | 265.8 | 249.1 | 282.5 | YLDs | 20-24 years | Both | 1998 | 40.3 | 18.7 | 40.3 |
| Prevalence | 20-24 years | Female | 1998 | 163.1 | 162.6 | 163.6 | YLDs | 20-24 years | Female | 1998 | 24.2 | 24.1 | 24.2 |
| Prevalence | 20-24 years | Male | 1998 | 368.2 | 367.4 | 368.9 | YLDs | 20-24 years | Male | 1998 | 56.3 | 56 | 56.3 |
| Prevalence | 20-24 years | Both | 1999 | 264.7 | 247.9 | 281.4 | YLDs | 20-24 years | Both | 1999 | 40.1 | 18.5 | 40.1 |
| Prevalence | 20-24 years | Female | 1999 | 162.4 | 161.9 | 162.9 | YLDs | 20-24 years | Female | 1999 | 24.2 | 24 | 24.2 |
| Prevalence | 20-24 years | Male | 1999 | 366.6 | 365.9 | 367.4 | YLDs | 20-24 years | Male | 1999 | 56 | 55.7 | 56 |
| Prevalence | 20-24 years | Both | 2000 | 263 | 246.2 | 279.8 | YLDs | 20-24 years | Both | 2000 | 39.8 | 18.2 | 39.8 |
| Prevalence | 20-24 years | Female | 2000 | 161 | 160.5 | 161.5 | YLDs | 20-24 years | Female | 2000 | 23.9 | 23.7 | 23.9 |
| Prevalence | 20-24 years | Male | 2000 | 364.7 | 363.9 | 365.4 | YLDs | 20-24 years | Male | 2000 | 55.7 | 55.4 | 55.7 |
| Prevalence | 20-24 years | Both | 2001 | 259.7 | 242.9 | 276.5 | YLDs | 20-24 years | Both | 2001 | 39.4 | 17.7 | 39.4 |
| Prevalence | 20-24 years | Female | 2001 | 159 | 158.5 | 159.5 | YLDs | 20-24 years | Female | 2001 | 23.6 | 23.5 | 23.6 |
| Prevalence | 20-24 years | Male | 2001 | 360 | 359.3 | 360.7 | YLDs | 20-24 years | Male | 2001 | 55 | 54.7 | 55 |
| Prevalence | 20-24 years | Both | 2002 | 255.6 | 238.7 | 272.4 | YLDs | 20-24 years | Both | 2002 | 38.8 | 17 | 38.8 |
| Prevalence | 20-24 years | Female | 2002 | 155.8 | 155.3 | 156.3 | YLDs | 20-24 years | Female | 2002 | 23.2 | 23 | 23.2 |
| Prevalence | 20-24 years | Male | 2002 | 354.7 | 354 | 355.4 | YLDs | 20-24 years | Male | 2002 | 54.2 | 53.9 | 54.2 |
| Prevalence | 20-24 years | Both | 2003 | 251 | 234.1 | 267.9 | YLDs | 20-24 years | Both | 2003 | 38.1 | 16.4 | 38.1 |
| Prevalence | 20-24 years | Female | 2003 | 152.6 | 152.1 | 153.1 | YLDs | 20-24 years | Female | 2003 | 22.7 | 22.5 | 22.7 |
| Prevalence | 20-24 years | Male | 2003 | 348.6 | 347.9 | 349.3 | YLDs | 20-24 years | Male | 2003 | 53.3 | 53 | 53.3 |
| Prevalence | 20-24 years | Both | 2004 | 247.4 | 230.5 | 264.4 | YLDs | 20-24 years | Both | 2004 | 37.6 | 15.9 | 37.6 |
| Prevalence | 20-24 years | Female | 2004 | 151.2 | 150.7 | 151.6 | YLDs | 20-24 years | Female | 2004 | 22.5 | 22.4 | 22.5 |
| Prevalence | 20-24 years | Male | 2004 | 342.7 | 342 | 343.4 | YLDs | 20-24 years | Male | 2004 | 52.4 | 52.2 | 52.4 |
| Prevalence | 20-24 years | Both | 2005 | 242.9 | 226 | 259.9 | YLDs | 20-24 years | Both | 2005 | 36.9 | 15.4 | 36.9 |
| Prevalence | 20-24 years | Female | 2005 | 148.4 | 147.9 | 148.8 | YLDs | 20-24 years | Female | 2005 | 22.1 | 21.9 | 22.1 |
| Prevalence | 20-24 years | Male | 2005 | 336.5 | 335.8 | 337.2 | YLDs | 20-24 years | Male | 2005 | 51.5 | 51.2 | 51.5 |
| Prevalence | 20-24 years | Both | 2006 | 239.2 | 222.1 | 256.2 | YLDs | 20-24 years | Both | 2006 | 36.3 | 15 | 36.3 |
| Prevalence | 20-24 years | Female | 2006 | 146 | 145.5 | 146.4 | YLDs | 20-24 years | Female | 2006 | 21.7 | 21.6 | 21.7 |
| Prevalence | 20-24 years | Male | 2006 | 331.3 | 330.7 | 332 | YLDs | 20-24 years | Male | 2006 | 50.7 | 50.5 | 50.7 |
| Prevalence | 20-24 years | Both | 2007 | 235.7 | 218.6 | 252.7 | YLDs | 20-24 years | Both | 2007 | 35.8 | 14.6 | 35.8 |
| Prevalence | 20-24 years | Female | 2007 | 143.9 | 143.5 | 144.4 | YLDs | 20-24 years | Female | 2007 | 21.4 | 21.3 | 21.4 |
| Prevalence | 20-24 years | Male | 2007 | 326.3 | 325.7 | 327 | YLDs | 20-24 years | Male | 2007 | 50 | 49.7 | 50 |
| Prevalence | 20-24 years | Both | 2008 | 233.8 | 216.7 | 250.9 | YLDs | 20-24 years | Both | 2008 | 35.6 | 14.4 | 35.6 |
| Prevalence | 20-24 years | Female | 2008 | 144.1 | 143.7 | 144.5 | YLDs | 20-24 years | Female | 2008 | 21.5 | 21.3 | 21.5 |
| Prevalence | 20-24 years | Male | 2008 | 322.3 | 321.7 | 323 | YLDs | 20-24 years | Male | 2008 | 49.5 | 49.2 | 49.5 |
| Prevalence | 20-24 years | Both | 2009 | 230.3 | 213.2 | 247.5 | YLDs | 20-24 years | Both | 2009 | 35 | 14.1 | 35 |
| Prevalence | 20-24 years | Female | 2009 | 140.9 | 140.5 | 141.3 | YLDs | 20-24 years | Female | 2009 | 21 | 20.8 | 21 |
| Prevalence | 20-24 years | Male | 2009 | 318.5 | 317.8 | 319.1 | YLDs | 20-24 years | Male | 2009 | 48.9 | 48.7 | 48.9 |
| Prevalence | 20-24 years | Both | 2010 | 227.7 | 210.6 | 244.9 | YLDs | 20-24 years | Both | 2010 | 34.7 | 13.7 | 34.7 |
| Prevalence | 20-24 years | Female | 2010 | 139.8 | 139.4 | 140.2 | YLDs | 20-24 years | Female | 2010 | 20.9 | 20.7 | 20.9 |
| Prevalence | 20-24 years | Male | 2010 | 314.2 | 313.6 | 314.8 | YLDs | 20-24 years | Male | 2010 | 48.3 | 48 | 48.3 |
| Prevalence | 20-24 years | Both | 2011 | 224.7 | 207.5 | 241.9 | YLDs | 20-24 years | Both | 2011 | 34.2 | 13.4 | 34.2 |
| Prevalence | 20-24 years | Female | 2011 | 137.9 | 137.5 | 138.3 | YLDs | 20-24 years | Female | 2011 | 20.6 | 20.4 | 20.6 |
| Prevalence | 20-24 years | Male | 2011 | 309.9 | 309.3 | 310.6 | YLDs | 20-24 years | Male | 2011 | 47.6 | 47.4 | 47.6 |
| Prevalence | 20-24 years | Both | 2012 | 220.3 | 203 | 237.5 | YLDs | 20-24 years | Both | 2012 | 33.5 | 13 | 33.5 |
| Prevalence | 20-24 years | Female | 2012 | 134.7 | 134.3 | 135.2 | YLDs | 20-24 years | Female | 2012 | 20.1 | 19.9 | 20.1 |
| Prevalence | 20-24 years | Male | 2012 | 304.3 | 303.7 | 304.9 | YLDs | 20-24 years | Male | 2012 | 46.7 | 46.5 | 46.7 |
| Prevalence | 20-24 years | Both | 2013 | 215.5 | 198.2 | 232.8 | YLDs | 20-24 years | Both | 2013 | 32.8 | 12.5 | 32.8 |
| Prevalence | 20-24 years | Female | 2013 | 131.6 | 131.2 | 132 | YLDs | 20-24 years | Female | 2013 | 19.6 | 19.4 | 19.6 |
| Prevalence | 20-24 years | Male | 2013 | 297.8 | 297.2 | 298.5 | YLDs | 20-24 years | Male | 2013 | 45.8 | 45.5 | 45.8 |
| Prevalence | 20-24 years | Both | 2014 | 211.7 | 194.3 | 229 | YLDs | 20-24 years | Both | 2014 | 32.2 | 12.1 | 32.2 |
| Prevalence | 20-24 years | Female | 2014 | 128.5 | 128.1 | 128.9 | YLDs | 20-24 years | Female | 2014 | 19.1 | 19 | 19.1 |
| Prevalence | 20-24 years | Male | 2014 | 293.1 | 292.4 | 293.7 | YLDs | 20-24 years | Male | 2014 | 45.1 | 44.8 | 45.1 |
| Prevalence | 20-24 years | Both | 2015 | 208 | 190.6 | 225.4 | YLDs | 20-24 years | Both | 2015 | 31.7 | 11.7 | 31.7 |
| Prevalence | 20-24 years | Female | 2015 | 126.1 | 125.7 | 126.5 | YLDs | 20-24 years | Female | 2015 | 18.7 | 18.6 | 18.7 |
| Prevalence | 20-24 years | Male | 2015 | 288 | 287.4 | 288.6 | YLDs | 20-24 years | Male | 2015 | 44.3 | 44 | 44.3 |
| Prevalence | 20-24 years | Both | 2016 | 203.9 | 186.4 | 221.4 | YLDs | 20-24 years | Both | 2016 | 31.1 | 11.3 | 31.1 |
| Prevalence | 20-24 years | Female | 2016 | 122.8 | 122.4 | 123.2 | YLDs | 20-24 years | Female | 2016 | 18.3 | 18.1 | 18.3 |
| Prevalence | 20-24 years | Male | 2016 | 282.9 | 282.3 | 283.5 | YLDs | 20-24 years | Male | 2016 | 43.5 | 43.3 | 43.5 |
| Prevalence | 20-24 years | Both | 2017 | 201.3 | 183.8 | 218.8 | YLDs | 20-24 years | Both | 2017 | 30.6 | 11 | 30.6 |
| Prevalence | 20-24 years | Female | 2017 | 121.2 | 120.8 | 121.6 | YLDs | 20-24 years | Female | 2017 | 18 | 17.8 | 18 |
| Prevalence | 20-24 years | Male | 2017 | 279.3 | 278.7 | 279.9 | YLDs | 20-24 years | Male | 2017 | 42.9 | 42.7 | 42.9 |
| Prevalence | 20-24 years | Both | 2018 | 199 | 181.5 | 216.5 | YLDs | 20-24 years | Both | 2018 | 30.3 | 10.7 | 30.3 |
| Prevalence | 20-24 years | Female | 2018 | 119.8 | 119.4 | 120.2 | YLDs | 20-24 years | Female | 2018 | 17.8 | 17.6 | 17.8 |
| Prevalence | 20-24 years | Male | 2018 | 275.9 | 275.3 | 276.5 | YLDs | 20-24 years | Male | 2018 | 42.4 | 42.2 | 42.4 |
| Prevalence | 20-24 years | Both | 2019 | 198 | 180.5 | 215.6 | YLDs | 20-24 years | Both | 2019 | 30.1 | 10.6 | 30.1 |
| Prevalence | 20-24 years | Female | 2019 | 119.2 | 118.8 | 119.6 | YLDs | 20-24 years | Female | 2019 | 17.7 | 17.6 | 17.7 |
| Prevalence | 20-24 years | Male | 2019 | 274.5 | 274 | 275.1 | YLDs | 20-24 years | Male | 2019 | 42.2 | 42 | 42.2 |
| Prevalence | 20-24 years | Both | 2020 | 198.6 | 181.1 | 216.1 | YLDs | 20-24 years | Both | 2020 | 30.1 | 10.6 | 30.1 |
| Prevalence | 20-24 years | Female | 2020 | 119.7 | 119.4 | 120.1 | YLDs | 20-24 years | Female | 2020 | 17.7 | 17.6 | 17.7 |
| Prevalence | 20-24 years | Male | 2020 | 275 | 274.5 | 275.6 | YLDs | 20-24 years | Male | 2020 | 42.2 | 41.9 | 42.2 |
| Prevalence | 20-24 years | Both | 2021 | 197.7 | 180.2 | 215.3 | YLDs | 20-24 years | Both | 2021 | 30 | 10.5 | 30 |
| Prevalence | 20-24 years | Female | 2021 | 119.2 | 118.8 | 119.6 | YLDs | 20-24 years | Female | 2021 | 17.6 | 17.5 | 17.6 |
| Prevalence | 20-24 years | Male | 2021 | 273.8 | 273.2 | 274.4 | YLDs | 20-24 years | Male | 2021 | 42 | 41.7 | 42 |

**Table S3. Global age-specific prevalence, and YLDs number of TBI in both sexes, females, and males from 1990 to 2021.**

| Measure | Age | Sex | Year | Number | 95% Lower UI | 95% Upper UI | Measure | Age | Sex | Year | Number | 95% Lower UI | 95%Upper UI |
| --- | --- | --- | --- | --- | --- | --- | --- | --- | --- | --- | --- | --- | --- |
| Prevalence | 10-14 years | Both | 1990 | 610983 | 510330 | 711636 | YLDs | 10-14 years | Both | 1990 | 91680 | 0 | 216740 |
| Prevalence | 10-14 years | Female | 1990 | 239122 | 188666 | 289577 | YLDs | 10-14 years | Female | 1990 | 35675 | 0 | 97615 |
| Prevalence | 10-14 years | Male | 1990 | 371861 | 321663 | 422059 | YLDs | 10-14 years | Male | 1990 | 56005 | 0 | 119125 |
| Prevalence | 10-14 years | Both | 1991 | 624101 | 522239 | 725962 | YLDs | 10-14 years | Both | 1991 | 93727 | 0 | 223090 |
| Prevalence | 10-14 years | Female | 1991 | 249443 | 198478 | 300408 | YLDs | 10-14 years | Female | 1991 | 37299 | 0 | 102221 |
| Prevalence | 10-14 years | Male | 1991 | 374658 | 323761 | 425554 | YLDs | 10-14 years | Male | 1991 | 56428 | 0 | 120868 |
| Prevalence | 10-14 years | Both | 1992 | 616040 | 512480 | 719599 | YLDs | 10-14 years | Both | 1992 | 92409 | 0 | 221527 |
| Prevalence | 10-14 years | Female | 1992 | 242754 | 190969 | 294538 | YLDs | 10-14 years | Female | 1992 | 36133 | 0 | 100053 |
| Prevalence | 10-14 years | Male | 1992 | 373286 | 321511 | 425061 | YLDs | 10-14 years | Male | 1992 | 56276 | 0 | 121474 |
| Prevalence | 10-14 years | Both | 1993 | 618792 | 513379 | 724204 | YLDs | 10-14 years | Both | 1993 | 92855 | 0 | 224339 |
| Prevalence | 10-14 years | Female | 1993 | 243978 | 191328 | 296628 | YLDs | 10-14 years | Female | 1993 | 36346 | 0 | 101512 |
| Prevalence | 10-14 years | Male | 1993 | 374814 | 322051 | 427576 | YLDs | 10-14 years | Male | 1993 | 56509 | 0 | 122827 |
| Prevalence | 10-14 years | Both | 1994 | 627286 | 519895 | 734678 | YLDs | 10-14 years | Both | 1994 | 94290 | 0 | 229301 |
| Prevalence | 10-14 years | Female | 1994 | 247040 | 193460 | 300620 | YLDs | 10-14 years | Female | 1994 | 36848 | 0 | 103724 |
| Prevalence | 10-14 years | Male | 1994 | 380247 | 326435 | 434059 | YLDs | 10-14 years | Male | 1994 | 57442 | 0 | 125577 |
| Prevalence | 10-14 years | Both | 1995 | 629955 | 520364 | 739546 | YLDs | 10-14 years | Both | 1995 | 94562 | 0 | 231665 |
| Prevalence | 10-14 years | Female | 1995 | 247876 | 193268 | 302484 | YLDs | 10-14 years | Female | 1995 | 36905 | 0 | 104693 |
| Prevalence | 10-14 years | Male | 1995 | 382079 | 327096 | 437062 | YLDs | 10-14 years | Male | 1995 | 57657 | 0 | 126973 |
| Prevalence | 10-14 years | Both | 1996 | 634870 | 522903 | 746838 | YLDs | 10-14 years | Both | 1996 | 95267 | 0 | 235146 |
| Prevalence | 10-14 years | Female | 1996 | 249646 | 193917 | 305376 | YLDs | 10-14 years | Female | 1996 | 37152 | 0 | 106223 |
| Prevalence | 10-14 years | Male | 1996 | 385224 | 328986 | 441462 | YLDs | 10-14 years | Male | 1996 | 58115 | 0 | 128923 |
| Prevalence | 10-14 years | Both | 1997 | 640112 | 525798 | 754426 | YLDs | 10-14 years | Both | 1997 | 96205 | 0 | 239172 |
| Prevalence | 10-14 years | Female | 1997 | 251501 | 194661 | 308342 | YLDs | 10-14 years | Female | 1997 | 37502 | 0 | 108021 |
| Prevalence | 10-14 years | Male | 1997 | 388611 | 331137 | 446085 | YLDs | 10-14 years | Male | 1997 | 58703 | 0 | 131151 |
| Prevalence | 10-14 years | Both | 1998 | 645606 | 529247 | 761965 | YLDs | 10-14 years | Both | 1998 | 97013 | 0 | 242954 |
| Prevalence | 10-14 years | Female | 1998 | 254117 | 196319 | 311914 | YLDs | 10-14 years | Female | 1998 | 37938 | 0 | 110059 |
| Prevalence | 10-14 years | Male | 1998 | 391489 | 332928 | 450050 | YLDs | 10-14 years | Male | 1998 | 59075 | 0 | 132896 |
| Prevalence | 10-14 years | Both | 1999 | 646836 | 528867 | 764805 | YLDs | 10-14 years | Both | 1999 | 97308 | 0 | 245541 |
| Prevalence | 10-14 years | Female | 1999 | 254700 | 196158 | 313243 | YLDs | 10-14 years | Female | 1999 | 38037 | 0 | 111262 |
| Prevalence | 10-14 years | Male | 1999 | 392136 | 332709 | 451563 | YLDs | 10-14 years | Male | 1999 | 59271 | 0 | 134279 |
| Prevalence | 10-14 years | Both | 2000 | 638767 | 519684 | 757850 | YLDs | 10-14 years | Both | 2000 | 96107 | 0 | 244693 |
| Prevalence | 10-14 years | Female | 2000 | 250145 | 191092 | 309197 | YLDs | 10-14 years | Female | 2000 | 37356 | 0 | 110436 |
| Prevalence | 10-14 years | Male | 2000 | 388623 | 328592 | 448653 | YLDs | 10-14 years | Male | 2000 | 58751 | 0 | 134257 |
| Prevalence | 10-14 years | Both | 2001 | 637234 | 517826 | 756642 | YLDs | 10-14 years | Both | 2001 | 95722 | 0 | 246460 |
| Prevalence | 10-14 years | Female | 2001 | 249586 | 190401 | 308771 | YLDs | 10-14 years | Female | 2001 | 37254 | 0 | 111619 |
| Prevalence | 10-14 years | Male | 2001 | 387648 | 327425 | 447870 | YLDs | 10-14 years | Male | 2001 | 58468 | 0 | 134840 |
| Prevalence | 10-14 years | Both | 2002 | 616721 | 497300 | 736141 | YLDs | 10-14 years | Both | 2002 | 92600 | 0 | 241643 |
| Prevalence | 10-14 years | Female | 2002 | 239953 | 180783 | 299123 | YLDs | 10-14 years | Female | 2002 | 35747 | 0 | 108807 |
| Prevalence | 10-14 years | Male | 2002 | 376768 | 316517 | 437018 | YLDs | 10-14 years | Male | 2002 | 56853 | 0 | 132836 |
| Prevalence | 10-14 years | Both | 2003 | 596675 | 477578 | 715771 | YLDs | 10-14 years | Both | 2003 | 89604 | 0 | 237160 |
| Prevalence | 10-14 years | Female | 2003 | 231363 | 172377 | 290349 | YLDs | 10-14 years | Female | 2003 | 34525 | 0 | 106682 |
| Prevalence | 10-14 years | Male | 2003 | 365312 | 305202 | 425421 | YLDs | 10-14 years | Male | 2003 | 55079 | 0 | 130478 |
| Prevalence | 10-14 years | Both | 2004 | 587080 | 468567 | 705593 | YLDs | 10-14 years | Both | 2004 | 88317 | 0 | 237541 |
| Prevalence | 10-14 years | Female | 2004 | 229731 | 171058 | 288405 | YLDs | 10-14 years | Female | 2004 | 34363 | 0 | 108026 |
| Prevalence | 10-14 years | Male | 2004 | 357349 | 297509 | 417188 | YLDs | 10-14 years | Male | 2004 | 53954 | 0 | 129515 |
| Prevalence | 10-14 years | Both | 2005 | 568984 | 451004 | 686964 | YLDs | 10-14 years | Both | 2005 | 85418 | 0 | 232933 |
| Prevalence | 10-14 years | Female | 2005 | 221996 | 163595 | 280396 | YLDs | 10-14 years | Female | 2005 | 33119 | 0 | 105693 |
| Prevalence | 10-14 years | Male | 2005 | 346989 | 287409 | 406568 | YLDs | 10-14 years | Male | 2005 | 52299 | 0 | 127240 |
| Prevalence | 10-14 years | Both | 2006 | 548284 | 430592 | 665976 | YLDs | 10-14 years | Both | 2006 | 82256 | 0 | 226416 |
| Prevalence | 10-14 years | Female | 2006 | 212840 | 154601 | 271079 | YLDs | 10-14 years | Female | 2006 | 31699 | 0 | 102063 |
| Prevalence | 10-14 years | Male | 2006 | 335444 | 275991 | 394897 | YLDs | 10-14 years | Male | 2006 | 50557 | 0 | 124352 |
| Prevalence | 10-14 years | Both | 2007 | 541059 | 423561 | 658556 | YLDs | 10-14 years | Both | 2007 | 81142 | 0 | 224976 |
| Prevalence | 10-14 years | Female | 2007 | 209978 | 151846 | 268111 | YLDs | 10-14 years | Female | 2007 | 31224 | 0 | 101213 |
| Prevalence | 10-14 years | Male | 2007 | 331080 | 271716 | 390445 | YLDs | 10-14 years | Male | 2007 | 49918 | 0 | 123763 |
| Prevalence | 10-14 years | Both | 2008 | 548372 | 431046 | 665699 | YLDs | 10-14 years | Both | 2008 | 82323 | 0 | 230548 |
| Prevalence | 10-14 years | Female | 2008 | 217227 | 159194 | 275260 | YLDs | 10-14 years | Female | 2008 | 32390 | 0 | 106033 |
| Prevalence | 10-14 years | Male | 2008 | 331145 | 271852 | 390439 | YLDs | 10-14 years | Male | 2008 | 49933 | 0 | 124515 |
| Prevalence | 10-14 years | Both | 2009 | 536561 | 419159 | 653963 | YLDs | 10-14 years | Both | 2009 | 80383 | 0 | 225497 |
| Prevalence | 10-14 years | Female | 2009 | 209719 | 151638 | 267801 | YLDs | 10-14 years | Female | 2009 | 31149 | 0 | 102110 |
| Prevalence | 10-14 years | Male | 2009 | 326841 | 267521 | 386162 | YLDs | 10-14 years | Male | 2009 | 49234 | 0 | 123387 |
| Prevalence | 10-14 years | Both | 2010 | 539530 | 421931 | 657129 | YLDs | 10-14 years | Both | 2010 | 80886 | 0 | 229713 |
| Prevalence | 10-14 years | Female | 2010 | 213400 | 155213 | 271587 | YLDs | 10-14 years | Female | 2010 | 31817 | 0 | 105703 |
| Prevalence | 10-14 years | Male | 2010 | 326130 | 266719 | 385542 | YLDs | 10-14 years | Male | 2010 | 49069 | 0 | 124010 |
| Prevalence | 10-14 years | Both | 2011 | 525565 | 407446 | 643685 | YLDs | 10-14 years | Both | 2011 | 78569 | 0 | 225831 |
| Prevalence | 10-14 years | Female | 2011 | 206205 | 147745 | 264665 | YLDs | 10-14 years | Female | 2011 | 30540 | 0 | 102921 |
| Prevalence | 10-14 years | Male | 2011 | 319361 | 259701 | 379020 | YLDs | 10-14 years | Male | 2011 | 48029 | 0 | 122910 |
| Prevalence | 10-14 years | Both | 2012 | 512627 | 393739 | 631514 | YLDs | 10-14 years | Both | 2012 | 76706 | 0 | 224522 |
| Prevalence | 10-14 years | Female | 2012 | 200961 | 142113 | 259809 | YLDs | 10-14 years | Female | 2012 | 29798 | 0 | 102508 |
| Prevalence | 10-14 years | Male | 2012 | 311666 | 251626 | 371706 | YLDs | 10-14 years | Male | 2012 | 46909 | 0 | 122014 |
| Prevalence | 10-14 years | Both | 2013 | 498654 | 378730 | 618578 | YLDs | 10-14 years | Both | 2013 | 74717 | 0 | 223133 |
| Prevalence | 10-14 years | Female | 2013 | 195657 | 136293 | 255020 | YLDs | 10-14 years | Female | 2013 | 29065 | 0 | 102231 |
| Prevalence | 10-14 years | Male | 2013 | 302997 | 242437 | 363557 | YLDs | 10-14 years | Male | 2013 | 45652 | 0 | 120901 |
| Prevalence | 10-14 years | Both | 2014 | 488379 | 367216 | 609543 | YLDs | 10-14 years | Both | 2014 | 73157 | 0 | 222658 |
| Prevalence | 10-14 years | Female | 2014 | 191516 | 131527 | 251504 | YLDs | 10-14 years | Female | 2014 | 28390 | 0 | 101954 |
| Prevalence | 10-14 years | Male | 2014 | 296863 | 235688 | 358038 | YLDs | 10-14 years | Male | 2014 | 44766 | 0 | 120704 |
| Prevalence | 10-14 years | Both | 2015 | 481499 | 358912 | 604085 | YLDs | 10-14 years | Both | 2015 | 72118 | 0 | 223706 |
| Prevalence | 10-14 years | Female | 2015 | 189108 | 128398 | 249818 | YLDs | 10-14 years | Female | 2015 | 28043 | 0 | 102868 |
| Prevalence | 10-14 years | Male | 2015 | 292391 | 230514 | 354267 | YLDs | 10-14 years | Male | 2015 | 44075 | 0 | 120839 |
| Prevalence | 10-14 years | Both | 2016 | 475714 | 351456 | 599972 | YLDs | 10-14 years | Both | 2016 | 71259 | 0 | 224349 |
| Prevalence | 10-14 years | Female | 2016 | 186383 | 124826 | 247941 | YLDs | 10-14 years | Female | 2016 | 27659 | 0 | 103109 |
| Prevalence | 10-14 years | Male | 2016 | 289331 | 226630 | 352031 | YLDs | 10-14 years | Male | 2016 | 43599 | 0 | 121239 |
| Prevalence | 10-14 years | Both | 2017 | 474029 | 347849 | 600209 | YLDs | 10-14 years | Both | 2017 | 71023 | 0 | 226486 |
| Prevalence | 10-14 years | Female | 2017 | 185668 | 123134 | 248201 | YLDs | 10-14 years | Female | 2017 | 27573 | 0 | 104279 |
| Prevalence | 10-14 years | Male | 2017 | 288362 | 224715 | 352008 | YLDs | 10-14 years | Male | 2017 | 43450 | 0 | 122207 |
| Prevalence | 10-14 years | Both | 2018 | 479367 | 351140 | 607593 | YLDs | 10-14 years | Both | 2018 | 71761 | 0 | 231407 |
| Prevalence | 10-14 years | Female | 2018 | 188185 | 124603 | 251766 | YLDs | 10-14 years | Female | 2018 | 27879 | 0 | 106830 |
| Prevalence | 10-14 years | Male | 2018 | 291182 | 226537 | 355826 | YLDs | 10-14 years | Male | 2018 | 43882 | 0 | 124577 |
| Prevalence | 10-14 years | Both | 2019 | 478856 | 348624 | 609088 | YLDs | 10-14 years | Both | 2019 | 71658 | 0 | 231853 |
| Prevalence | 10-14 years | Female | 2019 | 187309 | 122717 | 251901 | YLDs | 10-14 years | Female | 2019 | 27787 | 0 | 106811 |
| Prevalence | 10-14 years | Male | 2019 | 291547 | 225907 | 357187 | YLDs | 10-14 years | Male | 2019 | 43870 | 0 | 125042 |
| Prevalence | 10-14 years | Both | 2020 | 487236 | 355353 | 619119 | YLDs | 10-14 years | Both | 2020 | 72885 | 0 | 236495 |
| Prevalence | 10-14 years | Female | 2020 | 190449 | 124998 | 255900 | YLDs | 10-14 years | Female | 2020 | 28202 | 0 | 108877 |
| Prevalence | 10-14 years | Male | 2020 | 296787 | 230356 | 363219 | YLDs | 10-14 years | Male | 2020 | 44683 | 0 | 127618 |
| Prevalence | 10-14 years | Both | 2021 | 489036 | 355902 | 622171 | YLDs | 10-14 years | Both | 2021 | 73231 | 0 | 237217 |
| Prevalence | 10-14 years | Female | 2021 | 190684 | 124581 | 256788 | YLDs | 10-14 years | Female | 2021 | 28261 | 0 | 108967 |
| Prevalence | 10-14 years | Male | 2021 | 298352 | 231321 | 365383 | YLDs | 10-14 years | Male | 2021 | 44971 | 0 | 128250 |
| Prevalence | 15-19 years | Both | 1990 | 943047 | 851330 | 1034763 | YLDs | 15-19 years | Both | 1990 | 142388 | 37338 | 258911 |
| Prevalence | 15-19 years | Female | 1990 | 320885 | 273626 | 368143 | YLDs | 15-19 years | Female | 1990 | 47790 | 0 | 107053 |
| Prevalence | 15-19 years | Male | 1990 | 622162 | 577704 | 666620 | YLDs | 15-19 years | Male | 1990 | 94598 | 37338 | 151858 |
| Prevalence | 15-19 years | Both | 1991 | 933333 | 841708 | 1024958 | YLDs | 15-19 years | Both | 1991 | 140912 | 35739 | 257749 |
| Prevalence | 15-19 years | Female | 1991 | 322199 | 274997 | 369401 | YLDs | 15-19 years | Female | 1991 | 47968 | 0 | 107601 |
| Prevalence | 15-19 years | Male | 1991 | 611134 | 566711 | 655557 | YLDs | 15-19 years | Male | 1991 | 92943 | 35739 | 150147 |
| Prevalence | 15-19 years | Both | 1992 | 919262 | 827656 | 1010868 | YLDs | 15-19 years | Both | 1992 | 138578 | 34376 | 254960 |
| Prevalence | 15-19 years | Female | 1992 | 316432 | 269213 | 363651 | YLDs | 15-19 years | Female | 1992 | 47050 | 0 | 106280 |
| Prevalence | 15-19 years | Male | 1992 | 602830 | 558444 | 647217 | YLDs | 15-19 years | Male | 1992 | 91528 | 34376 | 148680 |
| Prevalence | 15-19 years | Both | 1993 | 907076 | 815312 | 998841 | YLDs | 15-19 years | Both | 1993 | 136867 | 33031 | 253316 |
| Prevalence | 15-19 years | Female | 1993 | 314235 | 266958 | 361512 | YLDs | 15-19 years | Female | 1993 | 46719 | 0 | 106050 |
| Prevalence | 15-19 years | Male | 1993 | 592841 | 548354 | 637329 | YLDs | 15-19 years | Male | 1993 | 90148 | 33031 | 147266 |
| Prevalence | 15-19 years | Both | 1994 | 908512 | 816351 | 1000673 | YLDs | 15-19 years | Both | 1994 | 137172 | 32765 | 254580 |
| Prevalence | 15-19 years | Female | 1994 | 315224 | 267752 | 362695 | YLDs | 15-19 years | Female | 1994 | 46880 | 0 | 106761 |
| Prevalence | 15-19 years | Male | 1994 | 593288 | 548598 | 637978 | YLDs | 15-19 years | Male | 1994 | 90292 | 32765 | 147819 |
| Prevalence | 15-19 years | Both | 1995 | 906341 | 813277 | 999406 | YLDs | 15-19 years | Both | 1995 | 136697 | 32009 | 254868 |
| Prevalence | 15-19 years | Female | 1995 | 314575 | 266675 | 362476 | YLDs | 15-19 years | Female | 1995 | 46746 | 0 | 106975 |
| Prevalence | 15-19 years | Male | 1995 | 591766 | 546601 | 636930 | YLDs | 15-19 years | Male | 1995 | 89951 | 32009 | 147893 |
| Prevalence | 15-19 years | Both | 1996 | 915442 | 821217 | 1009668 | YLDs | 15-19 years | Both | 1996 | 138115 | 32290 | 257920 |
| Prevalence | 15-19 years | Female | 1996 | 316042 | 267571 | 364514 | YLDs | 15-19 years | Female | 1996 | 46976 | 0 | 107931 |
| Prevalence | 15-19 years | Male | 1996 | 599400 | 553646 | 645154 | YLDs | 15-19 years | Male | 1996 | 91139 | 32290 | 149988 |
| Prevalence | 15-19 years | Both | 1997 | 920792 | 825087 | 1016496 | YLDs | 15-19 years | Both | 1997 | 138980 | 32081 | 260424 |
| Prevalence | 15-19 years | Female | 1997 | 317459 | 268282 | 366636 | YLDs | 15-19 years | Female | 1997 | 47203 | 0 | 108951 |
| Prevalence | 15-19 years | Male | 1997 | 603333 | 556805 | 649860 | YLDs | 15-19 years | Male | 1997 | 91777 | 32081 | 151473 |
| Prevalence | 15-19 years | Both | 1998 | 932077 | 834653 | 1029501 | YLDs | 15-19 years | Both | 1998 | 140790 | 32327 | 264413 |
| Prevalence | 15-19 years | Female | 1998 | 320124 | 270116 | 370133 | YLDs | 15-19 years | Female | 1998 | 47582 | 0 | 110324 |
| Prevalence | 15-19 years | Male | 1998 | 611952 | 564537 | 659368 | YLDs | 15-19 years | Male | 1998 | 93208 | 32327 | 154089 |
| Prevalence | 15-19 years | Both | 1999 | 942266 | 842845 | 1041686 | YLDs | 15-19 years | Both | 1999 | 142532 | 32251 | 268733 |
| Prevalence | 15-19 years | Female | 1999 | 323280 | 272310 | 374250 | YLDs | 15-19 years | Female | 1999 | 48094 | 0 | 112110 |
| Prevalence | 15-19 years | Male | 1999 | 618986 | 570535 | 667436 | YLDs | 15-19 years | Male | 1999 | 94437 | 32251 | 156624 |
| Prevalence | 15-19 years | Both | 2000 | 954184 | 852517 | 1055850 | YLDs | 15-19 years | Both | 2000 | 144320 | 32037 | 273583 |
| Prevalence | 15-19 years | Female | 2000 | 325945 | 273861 | 378028 | YLDs | 15-19 years | Female | 2000 | 48499 | 0 | 113978 |
| Prevalence | 15-19 years | Male | 2000 | 628239 | 578657 | 677821 | YLDs | 15-19 years | Male | 2000 | 95821 | 32037 | 159605 |
| Prevalence | 15-19 years | Both | 2001 | 953077 | 848736 | 1057418 | YLDs | 15-19 years | Both | 2001 | 144162 | 30188 | 276490 |
| Prevalence | 15-19 years | Female | 2001 | 327636 | 274256 | 381015 | YLDs | 15-19 years | Female | 2001 | 48760 | 0 | 115874 |
| Prevalence | 15-19 years | Male | 2001 | 625441 | 574479 | 676403 | YLDs | 15-19 years | Male | 2001 | 95402 | 30188 | 160617 |
| Prevalence | 15-19 years | Both | 2002 | 952084 | 845009 | 1059159 | YLDs | 15-19 years | Both | 2002 | 144125 | 28550 | 279695 |
| Prevalence | 15-19 years | Female | 2002 | 326610 | 271860 | 381361 | YLDs | 15-19 years | Female | 2002 | 48648 | 0 | 117290 |
| Prevalence | 15-19 years | Male | 2002 | 625473 | 573149 | 677798 | YLDs | 15-19 years | Male | 2002 | 95477 | 28550 | 162404 |
| Prevalence | 15-19 years | Both | 2003 | 945929 | 836336 | 1055522 | YLDs | 15-19 years | Both | 2003 | 143250 | 26467 | 281611 |
| Prevalence | 15-19 years | Female | 2003 | 324519 | 268517 | 380521 | YLDs | 15-19 years | Female | 2003 | 48372 | 0 | 118323 |
| Prevalence | 15-19 years | Male | 2003 | 621410 | 567819 | 675000 | YLDs | 15-19 years | Male | 2003 | 94878 | 26467 | 163288 |
| Prevalence | 15-19 years | Both | 2004 | 943555 | 831992 | 1055118 | YLDs | 15-19 years | Both | 2004 | 142968 | 24670 | 284265 |
| Prevalence | 15-19 years | Female | 2004 | 325096 | 268134 | 382057 | YLDs | 15-19 years | Female | 2004 | 48607 | 0 | 120212 |
| Prevalence | 15-19 years | Male | 2004 | 618459 | 563858 | 673061 | YLDs | 15-19 years | Male | 2004 | 94361 | 24670 | 164053 |
| Prevalence | 15-19 years | Both | 2005 | 928326 | 815310 | 1041343 | YLDs | 15-19 years | Both | 2005 | 140644 | 22642 | 282862 |
| Prevalence | 15-19 years | Female | 2005 | 319109 | 261442 | 376777 | YLDs | 15-19 years | Female | 2005 | 47613 | 0 | 119442 |
| Prevalence | 15-19 years | Male | 2005 | 609217 | 553867 | 664566 | YLDs | 15-19 years | Male | 2005 | 93031 | 22642 | 163420 |
| Prevalence | 15-19 years | Both | 2006 | 926793 | 813316 | 1040269 | YLDs | 15-19 years | Both | 2006 | 140287 | 21910 | 283839 |
| Prevalence | 15-19 years | Female | 2006 | 318149 | 260261 | 376037 | YLDs | 15-19 years | Female | 2006 | 47381 | 0 | 119937 |
| Prevalence | 15-19 years | Male | 2006 | 608644 | 553055 | 664232 | YLDs | 15-19 years | Male | 2006 | 92906 | 21910 | 163902 |
| Prevalence | 15-19 years | Both | 2007 | 913126 | 799700 | 1026553 | YLDs | 15-19 years | Both | 2007 | 138102 | 20722 | 281084 |
| Prevalence | 15-19 years | Female | 2007 | 312599 | 254761 | 370437 | YLDs | 15-19 years | Female | 2007 | 46518 | 0 | 118636 |
| Prevalence | 15-19 years | Male | 2007 | 600528 | 544939 | 656117 | YLDs | 15-19 years | Male | 2007 | 91585 | 20722 | 162447 |
| Prevalence | 15-19 years | Both | 2008 | 908834 | 795981 | 1021688 | YLDs | 15-19 years | Both | 2008 | 137546 | 20161 | 280780 |
| Prevalence | 15-19 years | Female | 2008 | 313512 | 256020 | 371004 | YLDs | 15-19 years | Female | 2008 | 46675 | 0 | 119200 |
| Prevalence | 15-19 years | Male | 2008 | 595322 | 539961 | 650684 | YLDs | 15-19 years | Male | 2008 | 90870 | 20161 | 161580 |
| Prevalence | 15-19 years | Both | 2009 | 891655 | 779409 | 1003900 | YLDs | 15-19 years | Both | 2009 | 134962 | 19341 | 276618 |
| Prevalence | 15-19 years | Female | 2009 | 303846 | 246653 | 361038 | YLDs | 15-19 years | Female | 2009 | 45216 | 0 | 116467 |
| Prevalence | 15-19 years | Male | 2009 | 587809 | 532756 | 642862 | YLDs | 15-19 years | Male | 2009 | 89746 | 19341 | 160151 |
| Prevalence | 15-19 years | Both | 2010 | 878192 | 766669 | 989715 | YLDs | 15-19 years | Both | 2010 | 133012 | 18049 | 274660 |
| Prevalence | 15-19 years | Female | 2010 | 301322 | 244536 | 358108 | YLDs | 15-19 years | Female | 2010 | 44904 | 0 | 116493 |
| Prevalence | 15-19 years | Male | 2010 | 576870 | 522133 | 631607 | YLDs | 15-19 years | Male | 2010 | 88108 | 18049 | 158167 |
| Prevalence | 15-19 years | Both | 2011 | 847276 | 735999 | 958553 | YLDs | 15-19 years | Both | 2011 | 128180 | 15679 | 268080 |
| Prevalence | 15-19 years | Female | 2011 | 289078 | 232435 | 345721 | YLDs | 15-19 years | Female | 2011 | 42983 | 0 | 113365 |
| Prevalence | 15-19 years | Male | 2011 | 558198 | 503564 | 612832 | YLDs | 15-19 years | Male | 2011 | 85197 | 15679 | 154715 |
| Prevalence | 15-19 years | Both | 2012 | 829278 | 718073 | 940484 | YLDs | 15-19 years | Both | 2012 | 125571 | 13985 | 265727 |
| Prevalence | 15-19 years | Female | 2012 | 282166 | 225568 | 338764 | YLDs | 15-19 years | Female | 2012 | 41992 | 0 | 112554 |
| Prevalence | 15-19 years | Male | 2012 | 547112 | 492505 | 601719 | YLDs | 15-19 years | Male | 2012 | 83579 | 13985 | 153173 |
| Prevalence | 15-19 years | Both | 2013 | 808232 | 696886 | 919577 | YLDs | 15-19 years | Both | 2013 | 122316 | 11962 | 262308 |
| Prevalence | 15-19 years | Female | 2013 | 275410 | 218767 | 332052 | YLDs | 15-19 years | Female | 2013 | 40908 | 0 | 111455 |
| Prevalence | 15-19 years | Male | 2013 | 532822 | 478119 | 587525 | YLDs | 15-19 years | Male | 2013 | 81408 | 11962 | 150853 |
| Prevalence | 15-19 years | Both | 2014 | 796774 | 685274 | 908274 | YLDs | 15-19 years | Both | 2014 | 120770 | 10899 | 261364 |
| Prevalence | 15-19 years | Female | 2014 | 269187 | 212444 | 325930 | YLDs | 15-19 years | Female | 2014 | 39974 | 0 | 110673 |
| Prevalence | 15-19 years | Male | 2014 | 527587 | 472830 | 582345 | YLDs | 15-19 years | Male | 2014 | 80795 | 10899 | 150692 |
| Prevalence | 15-19 years | Both | 2015 | 781498 | 669648 | 893347 | YLDs | 15-19 years | Both | 2015 | 118399 | 9310 | 259222 |
| Prevalence | 15-19 years | Female | 2015 | 263901 | 206995 | 320808 | YLDs | 15-19 years | Female | 2015 | 39140 | 0 | 110014 |
| Prevalence | 15-19 years | Male | 2015 | 517596 | 462653 | 572539 | YLDs | 15-19 years | Male | 2015 | 79259 | 9310 | 149208 |
| Prevalence | 15-19 years | Both | 2016 | 771120 | 658850 | 883390 | YLDs | 15-19 years | Both | 2016 | 116681 | 7970 | 258180 |
| Prevalence | 15-19 years | Female | 2016 | 259461 | 202340 | 316582 | YLDs | 15-19 years | Female | 2016 | 38447 | 0 | 109682 |
| Prevalence | 15-19 years | Male | 2016 | 511659 | 456510 | 566808 | YLDs | 15-19 years | Male | 2016 | 78234 | 7970 | 148498 |
| Prevalence | 15-19 years | Both | 2017 | 761096 | 648263 | 873928 | YLDs | 15-19 years | Both | 2017 | 115229 | 6679 | 257470 |
| Prevalence | 15-19 years | Female | 2017 | 255413 | 198015 | 312811 | YLDs | 15-19 years | Female | 2017 | 37845 | 0 | 109382 |
| Prevalence | 15-19 years | Male | 2017 | 505682 | 450248 | 561117 | YLDs | 15-19 years | Male | 2017 | 77384 | 6679 | 148088 |
| Prevalence | 15-19 years | Both | 2018 | 747790 | 634153 | 861427 | YLDs | 15-19 years | Both | 2018 | 113198 | 5060 | 255557 |
| Prevalence | 15-19 years | Female | 2018 | 251393 | 193624 | 309163 | YLDs | 15-19 years | Female | 2018 | 37237 | 0 | 108696 |
| Prevalence | 15-19 years | Male | 2018 | 496396 | 440529 | 552264 | YLDs | 15-19 years | Male | 2018 | 75960 | 5060 | 146861 |
| Prevalence | 15-19 years | Both | 2019 | 745931 | 631379 | 860484 | YLDs | 15-19 years | Both | 2019 | 112774 | 3980 | 256562 |
| Prevalence | 15-19 years | Female | 2019 | 251456 | 193245 | 309666 | YLDs | 15-19 years | Female | 2019 | 37264 | 0 | 109523 |
| Prevalence | 15-19 years | Male | 2019 | 494476 | 438134 | 550818 | YLDs | 15-19 years | Male | 2019 | 75510 | 3980 | 147040 |
| Prevalence | 15-19 years | Both | 2020 | 749036 | 633417 | 864656 | YLDs | 15-19 years | Both | 2020 | 113056 | 3206 | 258590 |
| Prevalence | 15-19 years | Female | 2020 | 254232 | 195510 | 312953 | YLDs | 15-19 years | Female | 2020 | 37612 | 0 | 110910 |
| Prevalence | 15-19 years | Male | 2020 | 494805 | 437907 | 551702 | YLDs | 15-19 years | Male | 2020 | 75443 | 3206 | 147680 |
| Prevalence | 15-19 years | Both | 2021 | 752540 | 635565 | 869515 | YLDs | 15-19 years | Both | 2021 | 113608 | 2760 | 260458 |
| Prevalence | 15-19 years | Female | 2021 | 255914 | 196520 | 315307 | YLDs | 15-19 years | Female | 2021 | 37849 | 0 | 111699 |
| Prevalence | 15-19 years | Male | 2021 | 496626 | 439044 | 554208 | YLDs | 15-19 years | Male | 2021 | 75759 | 2760 | 148759 |
| Prevalence | 20-24 years | Both | 1990 | 1406201 | 1324698 | 1487704 | YLDs | 20-24 years | Both | 1990 | 212347 | 107080 | 317613 |
| Prevalence | 20-24 years | Female | 1990 | 414307 | 371090 | 457524 | YLDs | 20-24 years | Female | 1990 | 61555 | 6732 | 116379 |
| Prevalence | 20-24 years | Male | 1990 | 991894 | 953608 | 1030181 | YLDs | 20-24 years | Male | 1990 | 150792 | 100348 | 201235 |
| Prevalence | 20-24 years | Both | 1991 | 1406060 | 1323640 | 1488480 | YLDs | 20-24 years | Both | 1991 | 212389 | 105735 | 319042 |
| Prevalence | 20-24 years | Female | 1991 | 418486 | 374905 | 462066 | YLDs | 20-24 years | Female | 1991 | 62206 | 6710 | 117702 |
| Prevalence | 20-24 years | Male | 1991 | 987574 | 948735 | 1026414 | YLDs | 20-24 years | Male | 1991 | 150183 | 99025 | 201340 |
| Prevalence | 20-24 years | Both | 1992 | 1396664 | 1313472 | 1479856 | YLDs | 20-24 years | Both | 1992 | 210880 | 103413 | 318347 |
| Prevalence | 20-24 years | Female | 1992 | 416365 | 372423 | 460307 | YLDs | 20-24 years | Female | 1992 | 61787 | 5983 | 117592 |
| Prevalence | 20-24 years | Male | 1992 | 980299 | 941049 | 1019549 | YLDs | 20-24 years | Male | 1992 | 149092 | 97430 | 200755 |
| Prevalence | 20-24 years | Both | 1993 | 1386726 | 1302976 | 1470476 | YLDs | 20-24 years | Both | 1993 | 209456 | 101285 | 317628 |
| Prevalence | 20-24 years | Female | 1993 | 416220 | 371990 | 460449 | YLDs | 20-24 years | Female | 1993 | 61791 | 5587 | 117994 |
| Prevalence | 20-24 years | Male | 1993 | 970506 | 930986 | 1010027 | YLDs | 20-24 years | Male | 1993 | 147666 | 95698 | 199634 |
| Prevalence | 20-24 years | Both | 1994 | 1380062 | 1296033 | 1464090 | YLDs | 20-24 years | Both | 1994 | 208712 | 100051 | 317374 |
| Prevalence | 20-24 years | Female | 1994 | 417211 | 372790 | 461632 | YLDs | 20-24 years | Female | 1994 | 61957 | 5386 | 118527 |
| Prevalence | 20-24 years | Male | 1994 | 962850 | 923243 | 1002457 | YLDs | 20-24 years | Male | 1994 | 146756 | 94664 | 198847 |
| Prevalence | 20-24 years | Both | 1995 | 1365381 | 1281195 | 1449567 | YLDs | 20-24 years | Both | 1995 | 206460 | 97737 | 315183 |
| Prevalence | 20-24 years | Female | 1995 | 415054 | 370482 | 459626 | YLDs | 20-24 years | Female | 1995 | 61620 | 4934 | 118305 |
| Prevalence | 20-24 years | Male | 1995 | 950327 | 910712 | 989941 | YLDs | 20-24 years | Male | 1995 | 144840 | 92802 | 196877 |
| Prevalence | 20-24 years | Both | 1996 | 1354833 | 1270657 | 1439009 | YLDs | 20-24 years | Both | 1996 | 205004 | 96326 | 313683 |
| Prevalence | 20-24 years | Female | 1996 | 413309 | 368674 | 457944 | YLDs | 20-24 years | Female | 1996 | 61342 | 4598 | 118085 |
| Prevalence | 20-24 years | Male | 1996 | 941524 | 901984 | 981065 | YLDs | 20-24 years | Male | 1996 | 143662 | 91727 | 195597 |
| Prevalence | 20-24 years | Both | 1997 | 1343646 | 1259497 | 1427796 | YLDs | 20-24 years | Both | 1997 | 203373 | 94812 | 311935 |
| Prevalence | 20-24 years | Female | 1997 | 411132 | 366459 | 455805 | YLDs | 20-24 years | Female | 1997 | 61064 | 4312 | 117815 |
| Prevalence | 20-24 years | Male | 1997 | 932514 | 893038 | 971991 | YLDs | 20-24 years | Male | 1997 | 142310 | 90500 | 194119 |
| Prevalence | 20-24 years | Both | 1998 | 1338712 | 1254431 | 1422994 | YLDs | 20-24 years | Both | 1998 | 202913 | 94203 | 311624 |
| Prevalence | 20-24 years | Female | 1998 | 410012 | 365236 | 454788 | YLDs | 20-24 years | Female | 1998 | 60944 | 4084 | 117805 |
| Prevalence | 20-24 years | Male | 1998 | 928700 | 889195 | 968206 | YLDs | 20-24 years | Male | 1998 | 141969 | 90119 | 193819 |
| Prevalence | 20-24 years | Both | 1999 | 1339596 | 1254826 | 1424367 | YLDs | 20-24 years | Both | 1999 | 203023 | 93662 | 312383 |
| Prevalence | 20-24 years | Female | 1999 | 410296 | 365252 | 455340 | YLDs | 20-24 years | Female | 1999 | 61032 | 3806 | 118258 |
| Prevalence | 20-24 years | Male | 1999 | 929301 | 889574 | 969027 | YLDs | 20-24 years | Male | 1999 | 141991 | 89856 | 194125 |
| Prevalence | 20-24 years | Both | 2000 | 1344035 | 1258353 | 1429718 | YLDs | 20-24 years | Both | 2000 | 203613 | 93082 | 314143 |
| Prevalence | 20-24 years | Female | 2000 | 410547 | 365025 | 456069 | YLDs | 20-24 years | Female | 2000 | 61029 | 3220 | 118838 |
| Prevalence | 20-24 years | Male | 2000 | 933488 | 893328 | 973649 | YLDs | 20-24 years | Male | 2000 | 142584 | 89863 | 195305 |
| Prevalence | 20-24 years | Both | 2001 | 1344139 | 1257200 | 1431077 | YLDs | 20-24 years | Both | 2001 | 203630 | 91527 | 315732 |
| Prevalence | 20-24 years | Female | 2001 | 410349 | 364197 | 456502 | YLDs | 20-24 years | Female | 2001 | 61009 | 2399 | 119618 |
| Prevalence | 20-24 years | Male | 2001 | 933789 | 893004 | 974575 | YLDs | 20-24 years | Male | 2001 | 142621 | 89128 | 196115 |
| Prevalence | 20-24 years | Both | 2002 | 1342762 | 1254255 | 1431270 | YLDs | 20-24 years | Both | 2002 | 203582 | 89570 | 317594 |
| Prevalence | 20-24 years | Female | 2002 | 407820 | 360866 | 454775 | YLDs | 20-24 years | Female | 2002 | 60646 | 1119 | 120173 |
| Prevalence | 20-24 years | Male | 2002 | 934942 | 893389 | 976495 | YLDs | 20-24 years | Male | 2002 | 142936 | 88451 | 197421 |
| Prevalence | 20-24 years | Both | 2003 | 1342337 | 1251977 | 1432697 | YLDs | 20-24 years | Both | 2003 | 203522 | 87472 | 319767 |
| Prevalence | 20-24 years | Female | 2003 | 406203 | 358305 | 454101 | YLDs | 20-24 years | Female | 2003 | 60409 | 0 | 121014 |
| Prevalence | 20-24 years | Male | 2003 | 936134 | 893672 | 978596 | YLDs | 20-24 years | Male | 2003 | 143112 | 87472 | 198752 |
| Prevalence | 20-24 years | Both | 2004 | 1349929 | 1257531 | 1442328 | YLDs | 20-24 years | Both | 2004 | 204995 | 86845 | 324152 |
| Prevalence | 20-24 years | Female | 2004 | 410228 | 361308 | 459147 | YLDs | 20-24 years | Female | 2004 | 61197 | 0 | 123400 |
| Prevalence | 20-24 years | Male | 2004 | 939702 | 896223 | 983180 | YLDs | 20-24 years | Male | 2004 | 143799 | 86845 | 200753 |
| Prevalence | 20-24 years | Both | 2005 | 1354994 | 1260257 | 1449732 | YLDs | 20-24 years | Both | 2005 | 205645 | 85982 | 327633 |
| Prevalence | 20-24 years | Female | 2005 | 411422 | 361292 | 461552 | YLDs | 20-24 years | Female | 2005 | 61281 | 0 | 124887 |
| Prevalence | 20-24 years | Male | 2005 | 943572 | 898965 | 988180 | YLDs | 20-24 years | Male | 2005 | 144364 | 85982 | 202746 |
| Prevalence | 20-24 years | Both | 2006 | 1366779 | 1269461 | 1464097 | YLDs | 20-24 years | Both | 2006 | 207541 | 85825 | 332742 |
| Prevalence | 20-24 years | Female | 2006 | 414661 | 363182 | 466140 | YLDs | 20-24 years | Female | 2006 | 61740 | 0 | 126964 |
| Prevalence | 20-24 years | Male | 2006 | 952118 | 906279 | 997957 | YLDs | 20-24 years | Male | 2006 | 145801 | 85825 | 205778 |
| Prevalence | 20-24 years | Both | 2007 | 1379667 | 1279746 | 1479587 | YLDs | 20-24 years | Both | 2007 | 209591 | 85683 | 337884 |
| Prevalence | 20-24 years | Female | 2007 | 418712 | 365886 | 471537 | YLDs | 20-24 years | Female | 2007 | 62350 | 0 | 129086 |
| Prevalence | 20-24 years | Male | 2007 | 960955 | 913860 | 1008050 | YLDs | 20-24 years | Male | 2007 | 147240 | 85683 | 208798 |
| Prevalence | 20-24 years | Both | 2008 | 1398867 | 1296641 | 1501094 | YLDs | 20-24 years | Both | 2008 | 212922 | 85983 | 344422 |
| Prevalence | 20-24 years | Female | 2008 | 428119 | 374156 | 482081 | YLDs | 20-24 years | Female | 2008 | 63896 | 0 | 132354 |
| Prevalence | 20-24 years | Male | 2008 | 970748 | 922484 | 1019013 | YLDs | 20-24 years | Male | 2008 | 149025 | 85983 | 212068 |
| Prevalence | 20-24 years | Both | 2009 | 1401911 | 1297668 | 1506154 | YLDs | 20-24 years | Both | 2009 | 213307 | 85674 | 346726 |
| Prevalence | 20-24 years | Female | 2009 | 425454 | 370452 | 480456 | YLDs | 20-24 years | Female | 2009 | 63373 | 0 | 132532 |
| Prevalence | 20-24 years | Male | 2009 | 976457 | 927216 | 1025698 | YLDs | 20-24 years | Male | 2009 | 149934 | 85674 | 214194 |
| Prevalence | 20-24 years | Both | 2010 | 1399546 | 1294095 | 1504996 | YLDs | 20-24 years | Both | 2010 | 213066 | 84475 | 348167 |
| Prevalence | 20-24 years | Female | 2010 | 426117 | 370526 | 481709 | YLDs | 20-24 years | Female | 2010 | 63583 | 0 | 133676 |
| Prevalence | 20-24 years | Male | 2010 | 973428 | 923569 | 1023287 | YLDs | 20-24 years | Male | 2010 | 149483 | 84475 | 214491 |
| Prevalence | 20-24 years | Both | 2011 | 1383339 | 1277466 | 1489213 | YLDs | 20-24 years | Both | 2011 | 210569 | 82544 | 346330 |
| Prevalence | 20-24 years | Female | 2011 | 421050 | 365262 | 476839 | YLDs | 20-24 years | Female | 2011 | 62736 | 0 | 133208 |
| Prevalence | 20-24 years | Male | 2011 | 962289 | 912204 | 1012374 | YLDs | 20-24 years | Male | 2011 | 147833 | 82544 | 213121 |
| Prevalence | 20-24 years | Both | 2012 | 1351852 | 1246000 | 1457705 | YLDs | 20-24 years | Both | 2012 | 205755 | 79477 | 341371 |
| Prevalence | 20-24 years | Female | 2012 | 409715 | 353959 | 465471 | YLDs | 20-24 years | Female | 2012 | 61037 | 0 | 131413 |
| Prevalence | 20-24 years | Male | 2012 | 942137 | 892040 | 992234 | YLDs | 20-24 years | Male | 2012 | 144718 | 79477 | 209958 |
| Prevalence | 20-24 years | Both | 2013 | 1314098 | 1208575 | 1419621 | YLDs | 20-24 years | Both | 2013 | 200021 | 75909 | 335079 |
| Prevalence | 20-24 years | Female | 2013 | 397203 | 341664 | 452742 | YLDs | 20-24 years | Female | 2013 | 59122 | 0 | 129188 |
| Prevalence | 20-24 years | Male | 2013 | 916895 | 866911 | 966879 | YLDs | 20-24 years | Male | 2013 | 140900 | 75909 | 205890 |
| Prevalence | 20-24 years | Both | 2014 | 1280314 | 1175320 | 1385307 | YLDs | 20-24 years | Both | 2014 | 194952 | 73023 | 329319 |
| Prevalence | 20-24 years | Female | 2014 | 384537 | 329309 | 439764 | YLDs | 20-24 years | Female | 2014 | 57236 | 0 | 126910 |
| Prevalence | 20-24 years | Male | 2014 | 895777 | 846011 | 945543 | YLDs | 20-24 years | Male | 2014 | 137716 | 73023 | 202409 |
| Prevalence | 20-24 years | Both | 2015 | 1248128 | 1143656 | 1352599 | YLDs | 20-24 years | Both | 2015 | 189959 | 70007 | 323689 |
| Prevalence | 20-24 years | Female | 2015 | 373809 | 318909 | 428709 | YLDs | 20-24 years | Female | 2015 | 55559 | 0 | 124895 |
| Prevalence | 20-24 years | Male | 2015 | 874319 | 824747 | 923890 | YLDs | 20-24 years | Male | 2015 | 134400 | 70007 | 198794 |
| Prevalence | 20-24 years | Both | 2016 | 1217357 | 1113107 | 1321607 | YLDs | 20-24 years | Both | 2016 | 185410 | 67303 | 318571 |
| Prevalence | 20-24 years | Female | 2016 | 362026 | 307283 | 416769 | YLDs | 20-24 years | Female | 2016 | 53868 | 0 | 122790 |
| Prevalence | 20-24 years | Male | 2016 | 855331 | 805824 | 904838 | YLDs | 20-24 years | Male | 2016 | 131542 | 67303 | 195782 |
| Prevalence | 20-24 years | Both | 2017 | 1198929 | 1094752 | 1303106 | YLDs | 20-24 years | Both | 2017 | 182389 | 65325 | 315380 |
| Prevalence | 20-24 years | Female | 2017 | 355997 | 301341 | 410652 | YLDs | 20-24 years | Female | 2017 | 52854 | 0 | 121635 |
| Prevalence | 20-24 years | Male | 2017 | 842933 | 793411 | 892455 | YLDs | 20-24 years | Male | 2017 | 129535 | 65325 | 193745 |
| Prevalence | 20-24 years | Both | 2018 | 1183681 | 1079452 | 1287911 | YLDs | 20-24 years | Both | 2018 | 180092 | 63775 | 312866 |
| Prevalence | 20-24 years | Female | 2018 | 351181 | 296547 | 405814 | YLDs | 20-24 years | Female | 2018 | 52108 | 0 | 120673 |
| Prevalence | 20-24 years | Male | 2018 | 832501 | 782905 | 882097 | YLDs | 20-24 years | Male | 2018 | 127984 | 63775 | 192193 |
| Prevalence | 20-24 years | Both | 2019 | 1178092 | 1073777 | 1282407 | YLDs | 20-24 years | Both | 2019 | 179278 | 63117 | 312149 |
| Prevalence | 20-24 years | Female | 2019 | 349147 | 294505 | 403789 | YLDs | 20-24 years | Female | 2019 | 51875 | 0 | 120459 |
| Prevalence | 20-24 years | Male | 2019 | 828945 | 779273 | 878618 | YLDs | 20-24 years | Male | 2019 | 127404 | 63117 | 191690 |
| Prevalence | 20-24 years | Both | 2020 | 1183384 | 1078946 | 1287823 | YLDs | 20-24 years | Both | 2020 | 179564 | 63134 | 312773 |
| Prevalence | 20-24 years | Female | 2020 | 351195 | 296523 | 405867 | YLDs | 20-24 years | Female | 2020 | 51963 | 0 | 120704 |
| Prevalence | 20-24 years | Male | 2020 | 832189 | 782423 | 881956 | YLDs | 20-24 years | Male | 2020 | 127602 | 63134 | 192069 |
| Prevalence | 20-24 years | Both | 2021 | 1180762 | 1076035 | 1285490 | YLDs | 20-24 years | Both | 2021 | 179118 | 62669 | 312502 |
| Prevalence | 20-24 years | Female | 2021 | 350096 | 295309 | 404883 | YLDs | 20-24 years | Female | 2021 | 51791 | 0 | 120517 |
| Prevalence | 20-24 years | Male | 2021 | 830666 | 780725 | 880608 | YLDs | 20-24 years | Male | 2021 | 127327 | 62669 | 191985 |

**Table S4. Global proportion of prevalence number of Traumatic brain injury (TBI) due to each cause from 1990 to 2021**

| Measure | Age | Cause | Year | Number | 95% Upper UI | 95% Lower UI | Proportion |
| --- | --- | --- | --- | --- | --- | --- | --- |
| Prevalence | 10-24 years | Motorcyclist road injuries | 1990 | 130678.0649 | 156116.6097 | 108732.3684 | 5.34623659540559 |
| Prevalence | 10-24 years | Pedestrian road injuries | 1990 | 266530.447 | 308432.8504 | 224884.9769 | 10.9041623062878 |
| Prevalence | 10-24 years | Falls | 1990 | 779724.9516 | 927627.3693 | 670203.6743 | 31.8997229855274 |
| Prevalence | 10-24 years | Physical violence by other means | 1990 | 268378.5352 | 314264.3863 | 226652.2711 | 10.9797703800218 |
| Prevalence | 10-24 years | Other transport injuries | 1990 | 60551.07797 | 75700.53962 | 49561.61 | 2.47723586343427 |
| Prevalence | 10-24 years | Motor vehicle road injuries | 1990 | 339471.8991 | 384501.5831 | 294181.3975 | 13.8883070503767 |
| Prevalence | 10-24 years | Cyclist road injuries | 1990 | 128100.6383 | 153467.1868 | 105459.3409 | 5.24079018845553 |
| Prevalence | 10-24 years | Other road injuries | 1990 | 91464.70258 | 114154.0602 | 72926.52387 | 3.74195883980437 |
| Prevalence | 10-24 years | Others | 1990 | 379399.7544 | 621559.1264 | 232770.0827 | 15.5218157906865 |
| Prevalence | 10-24 years | Motorcyclist road injuries | 1991 | 130653.4148 | 156044.6616 | 108690.5472 | 5.33563217896717 |
| Prevalence | 10-24 years | Pedestrian road injuries | 1991 | 261300.7087 | 302564.6119 | 220502.083 | 10.6710143922442 |
| Prevalence | 10-24 years | Falls | 1991 | 785866.4394 | 935421.3603 | 675500.5764 | 32.0932619239356 |
| Prevalence | 10-24 years | Physical violence by other means | 1991 | 269093.0402 | 315319.3928 | 227118.3384 | 10.9892381046839 |
| Prevalence | 10-24 years | Other transport injuries | 1991 | 59044.48077 | 73379.88128 | 48448.75996 | 2.4112621324829 |
| Prevalence | 10-24 years | Motor vehicle road injuries | 1991 | 337623.4979 | 382352.7144 | 292411.318 | 13.7878891457087 |
| Prevalence | 10-24 years | Cyclist road injuries | 1991 | 127541.215 | 152818.858 | 104997.9812 | 5.20853597236841 |
| Prevalence | 10-24 years | Other road injuries | 1991 | 90532.98706 | 113016.3296 | 72150.1428 | 3.6971916865303 |
| Prevalence | 10-24 years | Others | 1991 | 387040.2735 | 625464.6113 | 238848.8036 | 15.8059744630789 |
| Prevalence | 10-24 years | Motorcyclist road injuries | 1992 | 130424.7241 | 155820.1241 | 108542.0728 | 5.39491764364452 |
| Prevalence | 10-24 years | Pedestrian road injuries | 1992 | 255815.2946 | 296246.0685 | 215932.8203 | 10.5816014246923 |
| Prevalence | 10-24 years | Falls | 1992 | 791171.4357 | 942390.2742 | 679996.7606 | 32.7261933430112 |
| Prevalence | 10-24 years | Physical violence by other means | 1992 | 269319.8632 | 315903.2604 | 227208.2757 | 11.1402074398684 |
| Prevalence | 10-24 years | Other transport injuries | 1992 | 57681.35704 | 71314.07132 | 47414.89163 | 2.38594463551144 |
| Prevalence | 10-24 years | Motor vehicle road injuries | 1992 | 335517.1317 | 380271.2126 | 290504.5743 | 13.8784061537711 |
| Prevalence | 10-24 years | Cyclist road injuries | 1992 | 126809.2131 | 151994.3084 | 104391.0837 | 5.24536483286199 |
| Prevalence | 10-24 years | Other road injuries | 1992 | 89593.92151 | 111862.2748 | 71377.49562 | 3.70598313512247 |
| Prevalence | 10-24 years | Others | 1992 | 361215.0684 | 577104.4202 | 224675.3887 | 14.9413813915166 |
| Prevalence | 10-24 years | Motorcyclist road injuries | 1993 | 130057.6697 | 155460.7531 | 108271.0283 | 5.42246239283233 |
| Prevalence | 10-24 years | Pedestrian road injuries | 1993 | 250392.8274 | 289847.7685 | 211278.6725 | 10.4395664872616 |
| Prevalence | 10-24 years | Falls | 1993 | 796039.0067 | 949014.8207 | 684016.6568 | 33.1890582617317 |
| Prevalence | 10-24 years | Physical violence by other means | 1993 | 269394.2318 | 316237.3649 | 227212.0268 | 11.2317873613374 |
| Prevalence | 10-24 years | Other transport injuries | 1993 | 56590.71095 | 69675.5664 | 46648.07961 | 2.35942257475354 |
| Prevalence | 10-24 years | Motor vehicle road injuries | 1993 | 332964.6819 | 377753.6372 | 288295.8191 | 13.8822144815357 |
| Prevalence | 10-24 years | Cyclist road injuries | 1993 | 126061.9606 | 151169.3896 | 103765.5091 | 5.25587027736982 |
| Prevalence | 10-24 years | Other road injuries | 1993 | 88754.56568 | 110827.6212 | 70691.93404 | 3.70042224885387 |
| Prevalence | 10-24 years | Others | 1993 | 348242.6709 | 550269.3719 | 218904.8275 | 14.519195914324 |
| Prevalence | 10-24 years | Motorcyclist road injuries | 1994 | 129667.9407 | 155078.9418 | 107977.3054 | 5.39855808784181 |
| Prevalence | 10-24 years | Pedestrian road injuries | 1994 | 245267.1124 | 284108.782 | 206782.6455 | 10.2113810567258 |
| Prevalence | 10-24 years | Falls | 1994 | 801085.4516 | 955982.8535 | 688108.8443 | 33.3521633831853 |
| Prevalence | 10-24 years | Physical violence by other means | 1994 | 269257.7844 | 316234.1997 | 227085.5411 | 11.210201857451 |
| Prevalence | 10-24 years | Other transport injuries | 1994 | 55862.21628 | 68593.25516 | 46131.83273 | 2.32575159191344 |
| Prevalence | 10-24 years | Motor vehicle road injuries | 1994 | 330131.977 | 374983.4484 | 285829.245 | 13.744620643062 |
| Prevalence | 10-24 years | Cyclist road injuries | 1994 | 125371.3426 | 150426.309 | 103174.843 | 5.21967474707352 |
| Prevalence | 10-24 years | Other road injuries | 1994 | 88099.96069 | 110017.8418 | 70159.62852 | 3.66792865494736 |
| Prevalence | 10-24 years | Others | 1994 | 357155.7325 | 557559.8632 | 225130.8011 | 14.8697199777997 |
| Prevalence | 10-24 years | Motorcyclist road injuries | 1995 | 129463.1723 | 154924.5897 | 107829.784 | 5.42435693736027 |
| Prevalence | 10-24 years | Pedestrian road injuries | 1995 | 240779.1464 | 279305.9133 | 202841.6091 | 10.0883672935189 |
| Prevalence | 10-24 years | Falls | 1995 | 806854.1093 | 963903.1721 | 692756.3732 | 33.8062524458865 |
| Prevalence | 10-24 years | Physical violence by other means | 1995 | 268975.4485 | 315977.2796 | 226880.9315 | 11.2697596863271 |
| Prevalence | 10-24 years | Other transport injuries | 1995 | 55569.59871 | 68241.55763 | 45908.89609 | 2.32830180903048 |
| Prevalence | 10-24 years | Motor vehicle road injuries | 1995 | 327660.464 | 372422.2852 | 283666.7007 | 13.7285938496741 |
| Prevalence | 10-24 years | Cyclist road injuries | 1995 | 124876.9553 | 149929.2548 | 102730.8279 | 5.23219975815457 |
| Prevalence | 10-24 years | Other road injuries | 1995 | 87727.31927 | 109554.5508 | 69858.09351 | 3.67567304604233 |
| Prevalence | 10-24 years | Others | 1995 | 344794.6209 | 533777.9263 | 219239.6283 | 14.4464951740057 |
| Prevalence | 10-24 years | Motorcyclist road injuries | 1996 | 129624.1358 | 155050.0766 | 107923.3737 | 5.42516474902277 |
| Prevalence | 10-24 years | Pedestrian road injuries | 1996 | 236764.5766 | 275005.1012 | 199617.924 | 9.90931840633048 |
| Prevalence | 10-24 years | Falls | 1996 | 812049.8151 | 969471.6674 | 697581.4143 | 33.9867572049107 |
| Prevalence | 10-24 years | Physical violence by other means | 1996 | 268311.3249 | 315095.2959 | 226421.8089 | 11.229645872872 |
| Prevalence | 10-24 years | Other transport injuries | 1996 | 55752.70738 | 68501.8907 | 45901.05707 | 2.33342055377127 |
| Prevalence | 10-24 years | Motor vehicle road injuries | 1996 | 325530.0168 | 370218.5409 | 281933.5914 | 13.6244223422792 |
| Prevalence | 10-24 years | Cyclist road injuries | 1996 | 124747.1804 | 149735.2718 | 102660.1881 | 5.22104931669727 |
| Prevalence | 10-24 years | Other road injuries | 1996 | 87534.97873 | 109302.8485 | 69716.39292 | 3.66360537705088 |
| Prevalence | 10-24 years | Others | 1996 | 348997.6962 | 535586.1657 | 222839.0963 | 14.6066161770654 |
| Prevalence | 10-24 years | Motorcyclist road injuries | 1997 | 130115.8168 | 155548.3877 | 108272.4033 | 5.44745910196795 |
| Prevalence | 10-24 years | Pedestrian road injuries | 1997 | 232878.6342 | 270881.1393 | 196345.8189 | 9.7497511580518 |
| Prevalence | 10-24 years | Falls | 1997 | 815922.4924 | 973371.9777 | 700772.5589 | 34.1596011694464 |
| Prevalence | 10-24 years | Physical violence by other means | 1997 | 267176.977 | 313607.4387 | 225570.7651 | 11.1856935689231 |
| Prevalence | 10-24 years | Other transport injuries | 1997 | 56291.55969 | 69424.82834 | 46097.4067 | 2.35671555341044 |
| Prevalence | 10-24 years | Motor vehicle road injuries | 1997 | 323554.8861 | 368282.8987 | 280323.2278 | 13.5460242468512 |
| Prevalence | 10-24 years | Cyclist road injuries | 1997 | 124947.0115 | 150093.7912 | 102840.5945 | 5.23106069499284 |
| Prevalence | 10-24 years | Other road injuries | 1997 | 87363.12294 | 109072.1977 | 69576.66024 | 3.65756485983069 |
| Prevalence | 10-24 years | Others | 1997 | 350309.2731 | 534932.5228 | 224649.0501 | 14.6661296465256 |
| Prevalence | 10-24 years | Motorcyclist road injuries | 1998 | 130886.9098 | 156361.0003 | 108839.0239 | 5.45250555325186 |
| Prevalence | 10-24 years | Pedestrian road injuries | 1998 | 229277.9256 | 266845.3972 | 193168.6258 | 9.55129252025528 |
| Prevalence | 10-24 years | Falls | 1998 | 819735.1681 | 977256.3287 | 703861.2116 | 34.1486445290123 |
| Prevalence | 10-24 years | Physical violence by other means | 1998 | 266046.3903 | 312092.7408 | 224706.2795 | 11.0829984660037 |
| Prevalence | 10-24 years | Other transport injuries | 1998 | 57020.65692 | 70627.39606 | 46530.54905 | 2.37537465726286 |
| Prevalence | 10-24 years | Motor vehicle road injuries | 1998 | 321847.3034 | 366648.968 | 278715.8428 | 13.4075608612744 |
| Prevalence | 10-24 years | Cyclist road injuries | 1998 | 125368.7751 | 150838.9842 | 103189.6472 | 5.22263031101934 |
| Prevalence | 10-24 years | Other road injuries | 1998 | 87241.17464 | 108899.4232 | 69466.35451 | 3.63430529396467 |
| Prevalence | 10-24 years | Others | 1998 | 363066.7827 | 551817.934 | 233104.7839 | 15.1246878079555 |
| Prevalence | 10-24 years | Motorcyclist road injuries | 1999 | 131914.3612 | 157475.6171 | 109619.0915 | 5.467773083 |
| Prevalence | 10-24 years | Pedestrian road injuries | 1999 | 226154.7741 | 263597.1706 | 190427.6179 | 9.37398305405929 |
| Prevalence | 10-24 years | Falls | 1999 | 824475.1082 | 982414.5053 | 707767.4193 | 34.1740108008646 |
| Prevalence | 10-24 years | Physical violence by other means | 1999 | 265327.4683 | 311165.1193 | 224156.1101 | 10.9976683071076 |
| Prevalence | 10-24 years | Other transport injuries | 1999 | 57767.7912 | 71910.74034 | 47044.15255 | 2.39444114294837 |
| Prevalence | 10-24 years | Motor vehicle road injuries | 1999 | 320358.2574 | 365279.5602 | 277019.0145 | 13.2786623145426 |
| Prevalence | 10-24 years | Cyclist road injuries | 1999 | 125922.7249 | 151794.142 | 103640.2798 | 5.21942326458086 |
| Prevalence | 10-24 years | Other road injuries | 1999 | 87195.06289 | 108824.1898 | 69411.70909 | 3.61418433540154 |
| Prevalence | 10-24 years | Others | 1999 | 373463.7449 | 594742.5171 | 235600.7227 | 15.4798536972301 |
| Prevalence | 10-24 years | Motorcyclist road injuries | 2000 | 133119.6627 | 158811.6844 | 110568.7387 | 5.50116017329021 |
| Prevalence | 10-24 years | Pedestrian road injuries | 2000 | 223510.576 | 260918.4545 | 188236.1953 | 9.23655795140739 |
| Prevalence | 10-24 years | Falls | 2000 | 831086.8641 | 989879.7908 | 713307.9401 | 34.3446029279307 |
| Prevalence | 10-24 years | Physical violence by other means | 2000 | 265181.4921 | 311053.8786 | 223964.7691 | 10.9586054640311 |
| Prevalence | 10-24 years | Other transport injuries | 2000 | 58310.68059 | 72854.44949 | 47462.35703 | 2.40968454421388 |
| Prevalence | 10-24 years | Motor vehicle road injuries | 2000 | 318993.7429 | 364063.9906 | 275608.7719 | 13.182392731305 |
| Prevalence | 10-24 years | Cyclist road injuries | 2000 | 126440.5086 | 152711.7535 | 104004.1887 | 5.22514462621815 |
| Prevalence | 10-24 years | Other road injuries | 2000 | 87215.71846 | 108842.7737 | 69445.81337 | 3.60418308719951 |
| Prevalence | 10-24 years | Others | 2000 | 375987.8142 | 585911.5172 | 238910.5326 | 15.537668494404 |
| Prevalence | 10-24 years | Motorcyclist road injuries | 2001 | 134250.7767 | 160149.4046 | 111457.2275 | 5.55442040022645 |
| Prevalence | 10-24 years | Pedestrian road injuries | 2001 | 220249.8358 | 257034.5843 | 185504.267 | 9.11249983936999 |
| Prevalence | 10-24 years | Falls | 2001 | 833937.8789 | 992469.1913 | 716074.8661 | 34.5029033048696 |
| Prevalence | 10-24 years | Physical violence by other means | 2001 | 264481.1773 | 310237.603 | 223114.6487 | 10.9425038929479 |
| Prevalence | 10-24 years | Other transport injuries | 2001 | 58213.21584 | 72663.67682 | 47379.5457 | 2.40848270358261 |
| Prevalence | 10-24 years | Motor vehicle road injuries | 2001 | 316866.4344 | 361992.2356 | 273842.868 | 13.1098637240017 |
| Prevalence | 10-24 years | Cyclist road injuries | 2001 | 126211.984 | 152600.5646 | 103757.7423 | 5.22182765652971 |
| Prevalence | 10-24 years | Other road injuries | 2001 | 86941.08064 | 108601.5742 | 69300.59794 | 3.59705413849236 |
| Prevalence | 10-24 years | Others | 2001 | 375855.4593 | 587864.3505 | 239994.1538 | 15.5504443399798 |
| Prevalence | 10-24 years | Motorcyclist road injuries | 2002 | 135225.0089 | 161547.2621 | 112376.3233 | 5.64544695488912 |
| Prevalence | 10-24 years | Pedestrian road injuries | 2002 | 215807.0656 | 251520.522 | 181736.9653 | 9.00963032833697 |
| Prevalence | 10-24 years | Falls | 2002 | 829846.9245 | 986758.9869 | 713033.6103 | 34.6448991281422 |
| Prevalence | 10-24 years | Physical violence by other means | 2002 | 262660.6576 | 308378.949 | 221224.2436 | 10.9656994788121 |
| Prevalence | 10-24 years | Other transport injuries | 2002 | 57462.18797 | 71519.03286 | 46849.04594 | 2.39896256421324 |
| Prevalence | 10-24 years | Motor vehicle road injuries | 2002 | 313505.1644 | 358466.4226 | 270634.3211 | 13.088383503179 |
| Prevalence | 10-24 years | Cyclist road injuries | 2002 | 125014.75 | 151318.2818 | 102789.2025 | 5.21918353302268 |
| Prevalence | 10-24 years | Other road injuries | 2002 | 86219.85993 | 107916.5208 | 68815.5578 | 3.59955343802373 |
| Prevalence | 10-24 years | Others | 2002 | 369551.6144 | 572193.4235 | 237643.6923 | 15.428241071381 |
| Prevalence | 10-24 years | Motorcyclist road injuries | 2003 | 136100.6922 | 162850.5636 | 113159.2434 | 5.74053797953046 |
| Prevalence | 10-24 years | Pedestrian road injuries | 2003 | 210786.6297 | 245922.6792 | 177617.7018 | 8.89068698924716 |
| Prevalence | 10-24 years | Falls | 2003 | 822746.158 | 977413.0352 | 707424.4292 | 34.7022891005676 |
| Prevalence | 10-24 years | Physical violence by other means | 2003 | 260356.1402 | 305906.3112 | 218911.221 | 10.9814600268584 |
| Prevalence | 10-24 years | Other transport injuries | 2003 | 56427.88664 | 69982.70511 | 46111.97928 | 2.38004980816372 |
| Prevalence | 10-24 years | Motor vehicle road injuries | 2003 | 309291.4614 | 353920.9038 | 266471.2806 | 13.0454838414935 |
| Prevalence | 10-24 years | Cyclist road injuries | 2003 | 123327.8798 | 149581.2118 | 101421.2996 | 5.20179851022732 |
| Prevalence | 10-24 years | Other road injuries | 2003 | 85271.79759 | 106960.2158 | 68151.87556 | 3.59664587105038 |
| Prevalence | 10-24 years | Others | 2003 | 366561.3441 | 562102.7994 | 236697.8629 | 15.4610478728615 |
| Prevalence | 10-24 years | Motorcyclist road injuries | 2004 | 137004.7514 | 164172.2306 | 113904.0146 | 5.78238607251884 |
| Prevalence | 10-24 years | Pedestrian road injuries | 2004 | 205871.5186 | 240024.2864 | 173544.439 | 8.68895851944113 |
| Prevalence | 10-24 years | Falls | 2004 | 816672.3957 | 968568.9459 | 702592.4833 | 34.4682577680753 |
| Prevalence | 10-24 years | Physical violence by other means | 2004 | 258101.9432 | 303307.8219 | 216655.3391 | 10.8933819185028 |
| Prevalence | 10-24 years | Other transport injuries | 2004 | 55514.16238 | 68653.74796 | 45462.95964 | 2.34301596180745 |
| Prevalence | 10-24 years | Motor vehicle road injuries | 2004 | 304723.9498 | 348938.3348 | 262012.2751 | 12.8610979201883 |
| Prevalence | 10-24 years | Cyclist road injuries | 2004 | 121664.4214 | 147877.9046 | 100089.6152 | 5.13493618750819 |
| Prevalence | 10-24 years | Other road injuries | 2004 | 84335.63576 | 105817.9355 | 67495.62163 | 3.55944739618458 |
| Prevalence | 10-24 years | Others | 2004 | 385457.538 | 590525.3607 | 250120.1844 | 16.2685182557734 |
| Prevalence | 10-24 years | Motorcyclist road injuries | 2005 | 138072.6294 | 165707.7058 | 114826.0247 | 5.8930841653475 |
| Prevalence | 10-24 years | Pedestrian road injuries | 2005 | 201803.4715 | 235520.8171 | 169972.4866 | 8.6131831310573 |
| Prevalence | 10-24 years | Falls | 2005 | 816061.5477 | 966328.6383 | 702287.4204 | 34.8303599750223 |
| Prevalence | 10-24 years | Physical violence by other means | 2005 | 256587.1207 | 301595.446 | 215221.5325 | 10.9514065503071 |
| Prevalence | 10-24 years | Other transport injuries | 2005 | 55152.74905 | 68162.81046 | 45207.82569 | 2.35397698670856 |
| Prevalence | 10-24 years | Motor vehicle road injuries | 2005 | 300461.1522 | 344294.2762 | 257908.5797 | 12.8239960810936 |
| Prevalence | 10-24 years | Cyclist road injuries | 2005 | 120567.9421 | 146823.7055 | 99252.44449 | 5.14596581180226 |
| Prevalence | 10-24 years | Other road injuries | 2005 | 83671.63436 | 105025.3101 | 67048.80603 | 3.57119282567716 |
| Prevalence | 10-24 years | Others | 2005 | 370582.1711 | 569764.9778 | 240508.8495 | 15.8168344729843 |
| Prevalence | 10-24 years | Motorcyclist road injuries | 2006 | 139374.7534 | 167439.369 | 115904.4307 | 5.97324731462916 |
| Prevalence | 10-24 years | Pedestrian road injuries | 2006 | 198312.4967 | 231064.9531 | 166865.9332 | 8.49916903509067 |
| Prevalence | 10-24 years | Falls | 2006 | 821472.3228 | 971680.8171 | 707004.6037 | 35.206213654239 |
| Prevalence | 10-24 years | Physical violence by other means | 2006 | 255722.5708 | 300739.0493 | 214304.8557 | 10.9596187405428 |
| Prevalence | 10-24 years | Other transport injuries | 2006 | 55403.00586 | 68647.05798 | 45384.38144 | 2.3744318673401 |
| Prevalence | 10-24 years | Motor vehicle road injuries | 2006 | 296484.5738 | 339805.769 | 254249.4799 | 12.7065744769226 |
| Prevalence | 10-24 years | Cyclist road injuries | 2006 | 119924.9132 | 146138.6809 | 98628.72685 | 5.13967665057074 |
| Prevalence | 10-24 years | Other road injuries | 2006 | 83245.28206 | 104368.8351 | 66813.80917 | 3.56768098518797 |
| Prevalence | 10-24 years | Others | 2006 | 363376.3842 | 556067.9123 | 236234.6119 | 15.573387275477 |
| Prevalence | 10-24 years | Motorcyclist road injuries | 2007 | 140637.1324 | 169205.5869 | 116906.0837 | 6.04719087160231 |
| Prevalence | 10-24 years | Pedestrian road injuries | 2007 | 194420.2653 | 226612.8586 | 163625.3808 | 8.35978687501067 |
| Prevalence | 10-24 years | Falls | 2007 | 828527.9629 | 979183.8259 | 712869.1982 | 35.6254898590078 |
| Prevalence | 10-24 years | Physical violence by other means | 2007 | 254600.3154 | 299410.0495 | 213237.0699 | 10.9474409561692 |
| Prevalence | 10-24 years | Other transport injuries | 2007 | 55853.76415 | 69483.15539 | 45727.82017 | 2.40163011680198 |
| Prevalence | 10-24 years | Motor vehicle road injuries | 2007 | 292038.3623 | 334705.548 | 250272.158 | 12.5572221825126 |
| Prevalence | 10-24 years | Cyclist road injuries | 2007 | 119130.585 | 145333.3673 | 97882.19876 | 5.12244080810512 |
| Prevalence | 10-24 years | Other road injuries | 2007 | 82767.69406 | 103635.849 | 66489.15418 | 3.55888971455738 |
| Prevalence | 10-24 years | Others | 2007 | 357684.4671 | 544082.0518 | 233923.6527 | 15.379908616233 |
| Prevalence | 10-24 years | Motorcyclist road injuries | 2008 | 141653.0707 | 170617.5365 | 117694.3203 | 6.03109269216191 |
| Prevalence | 10-24 years | Pedestrian road injuries | 2008 | 189981.8412 | 221670.9876 | 159935.8199 | 8.08876283756257 |
| Prevalence | 10-24 years | Falls | 2008 | 834942.8454 | 986018.6039 | 717969.3998 | 35.5489483452815 |
| Prevalence | 10-24 years | Physical violence by other means | 2008 | 253165.9323 | 297662.0605 | 211994.1905 | 10.7789206167833 |
| Prevalence | 10-24 years | Other transport injuries | 2008 | 56272.6286 | 70319.33469 | 45950.44211 | 2.39589186059347 |
| Prevalence | 10-24 years | Motor vehicle road injuries | 2008 | 287118.0712 | 329151.4678 | 245965.6024 | 12.2244840330309 |
| Prevalence | 10-24 years | Cyclist road injuries | 2008 | 118100.2901 | 144295.1452 | 96951.39175 | 5.02829760798338 |
| Prevalence | 10-24 years | Other road injuries | 2008 | 82182.72997 | 102884.4579 | 66021.45924 | 3.49905342464265 |
| Prevalence | 10-24 years | Others | 2008 | 385295.7994 | 582802.6232 | 252052.664 | 16.4045485819604 |
| Prevalence | 10-24 years | Motorcyclist road injuries | 2009 | 142065.6559 | 171081.4022 | 118024.8878 | 6.11403507387957 |
| Prevalence | 10-24 years | Pedestrian road injuries | 2009 | 184861.9505 | 215862.3192 | 155641.7013 | 7.955845781 |
| Prevalence | 10-24 years | Falls | 2009 | 838274.8028 | 989673.3029 | 721249.6746 | 36.0765697620566 |
| Prevalence | 10-24 years | Physical violence by other means | 2009 | 251433.5505 | 295510.9132 | 210567.3423 | 10.8208668503889 |
| Prevalence | 10-24 years | Other transport injuries | 2009 | 56434.58409 | 70802.50105 | 46088.16646 | 2.42875749469627 |
| Prevalence | 10-24 years | Motor vehicle road injuries | 2009 | 281502.0028 | 322975.2939 | 241006.9151 | 12.1149134010125 |
| Prevalence | 10-24 years | Cyclist road injuries | 2009 | 116750.9029 | 142832.4484 | 95846.10302 | 5.02457198902573 |
| Prevalence | 10-24 years | Other road injuries | 2009 | 81390.35434 | 101921.1334 | 65391.89898 | 3.50277115153379 |
| Prevalence | 10-24 years | Others | 2009 | 370885.1645 | 566441.5356 | 241710.7135 | 15.9616684959436 |
| Prevalence | 10-24 years | Motorcyclist road injuries | 2010 | 141151.8794 | 169863.5388 | 117275.7759 | 6.09903618252201 |
| Prevalence | 10-24 years | Pedestrian road injuries | 2010 | 178905.6303 | 208969.2026 | 150581.309 | 7.73033924234526 |
| Prevalence | 10-24 years | Falls | 2010 | 835742.7442 | 986886.9661 | 719338.407 | 36.111635621311 |
| Prevalence | 10-24 years | Physical violence by other means | 2010 | 249022.5401 | 292524.8971 | 208621.5406 | 10.7600230956148 |
| Prevalence | 10-24 years | Other transport injuries | 2010 | 56115.06294 | 70576.59074 | 45872.92506 | 2.42467759345725 |
| Prevalence | 10-24 years | Motor vehicle road injuries | 2010 | 274588.6247 | 315267.534 | 235086.7178 | 11.8647088828933 |
| Prevalence | 10-24 years | Cyclist road injuries | 2010 | 114961.9163 | 140821.4692 | 94496.1338 | 4.96739320869267 |
| Prevalence | 10-24 years | Other road injuries | 2010 | 80237.79044 | 100490.7561 | 64484.27007 | 3.46699731650317 |
| Prevalence | 10-24 years | Others | 2010 | 383604.7186 | 582872.4399 | 250602.8133 | 16.5751888566605 |
| Prevalence | 10-24 years | Motorcyclist road injuries | 2011 | 138643.5197 | 166731.6473 | 115368.2166 | 6.13336014154633 |
| Prevalence | 10-24 years | Pedestrian road injuries | 2011 | 171442.0526 | 200037.976 | 144504.2325 | 7.58431302290235 |
| Prevalence | 10-24 years | Falls | 2011 | 824461.9203 | 973074.8621 | 709527.4198 | 36.4728325646421 |
| Prevalence | 10-24 years | Physical violence by other means | 2011 | 244964.6021 | 287610.5035 | 205342.6186 | 10.8368290841212 |
| Prevalence | 10-24 years | Other transport injuries | 2011 | 54947.52127 | 68937.12148 | 44795.73374 | 2.43078751580617 |
| Prevalence | 10-24 years | Motor vehicle road injuries | 2011 | 265660.9155 | 305090.1122 | 227718.4672 | 11.752399779089 |
| Prevalence | 10-24 years | Cyclist road injuries | 2011 | 112248.7569 | 137426.3744 | 92440.19281 | 4.96569946434059 |
| Prevalence | 10-24 years | Other road injuries | 2011 | 78545.1594 | 98434.05796 | 63148.54172 | 3.47470802110171 |
| Prevalence | 10-24 years | Others | 2011 | 369567.8409 | 566749.2684 | 240118.4854 | 16.3490704064504 |
| Prevalence | 10-24 years | Motorcyclist road injuries | 2012 | 135206.7663 | 162466.2106 | 112737.2796 | 6.11987811150676 |
| Prevalence | 10-24 years | Pedestrian road injuries | 2012 | 162452.1897 | 189294.7661 | 137020.1283 | 7.35309058206041 |
| Prevalence | 10-24 years | Falls | 2012 | 805899.2241 | 950443.8489 | 693544.228 | 36.4775015083684 |
| Prevalence | 10-24 years | Physical violence by other means | 2012 | 239357.6436 | 280861.04 | 200805.6798 | 10.8340702464495 |
| Prevalence | 10-24 years | Other transport injuries | 2012 | 53064.27556 | 66255.20719 | 43309.53474 | 2.4018538967351 |
| Prevalence | 10-24 years | Motor vehicle road injuries | 2012 | 254891.106 | 293224.1167 | 218854.5005 | 11.5371629920207 |
| Prevalence | 10-24 years | Cyclist road injuries | 2012 | 108573.6706 | 132821.9266 | 89570.96982 | 4.91438149416702 |
| Prevalence | 10-24 years | Other road injuries | 2012 | 76368.32654 | 95777.78738 | 61444.52322 | 3.45666761208937 |
| Prevalence | 10-24 years | Others | 2012 | 373491.6863 | 572311.7364 | 241309.0332 | 16.9053935566028 |
| Prevalence | 10-24 years | Motorcyclist road injuries | 2013 | 131410.9783 | 157820.885 | 109658.5112 | 6.11461869521054 |
| Prevalence | 10-24 years | Pedestrian road injuries | 2013 | 152983.404 | 178258.6935 | 129083.8056 | 7.11839447705677 |
| Prevalence | 10-24 years | Falls | 2013 | 784322.3873 | 924332.7141 | 675516.5282 | 36.494913853455 |
| Prevalence | 10-24 years | Physical violence by other means | 2013 | 233238.6924 | 273469.4948 | 195970.112 | 10.8527132774226 |
| Prevalence | 10-24 years | Other transport injuries | 2013 | 50992.06636 | 63297.13255 | 41675.6405 | 2.37268640950581 |
| Prevalence | 10-24 years | Motor vehicle road injuries | 2013 | 243720.4577 | 280528.0395 | 209634.8357 | 11.3404350712279 |
| Prevalence | 10-24 years | Cyclist road injuries | 2013 | 104478.9676 | 127581.8902 | 86337.89516 | 4.86145873661193 |
| Prevalence | 10-24 years | Other road injuries | 2013 | 73977.76571 | 92872.0735 | 59580.7101 | 3.44222252274543 |
| Prevalence | 10-24 years | Others | 2013 | 374003.2124 | 571945.4009 | 240186.2125 | 17.4025569567641 |
| Prevalence | 10-24 years | Motorcyclist road injuries | 2014 | 127678.6465 | 153216.5805 | 106616.8254 | 6.06379460732819 |
| Prevalence | 10-24 years | Pedestrian road injuries | 2014 | 143973.5897 | 167867.4896 | 121587.1379 | 6.83768430158399 |
| Prevalence | 10-24 years | Falls | 2014 | 764063.6665 | 900045.06 | 658272.2317 | 36.2873923524723 |
| Prevalence | 10-24 years | Physical violence by other means | 2014 | 227500.4947 | 266535.7932 | 191429.6972 | 10.8045966239653 |
| Prevalence | 10-24 years | Other transport injuries | 2014 | 49236.29956 | 60884.17492 | 40317.85388 | 2.33836131523155 |
| Prevalence | 10-24 years | Motor vehicle road injuries | 2014 | 233415.9913 | 268508.9426 | 200895.87 | 11.0855391101683 |
| Prevalence | 10-24 years | Cyclist road injuries | 2014 | 100498.5112 | 122641.5576 | 83180.19994 | 4.77293852154888 |
| Prevalence | 10-24 years | Other road injuries | 2014 | 71642.77515 | 90023.73137 | 57765.73119 | 3.40250375076303 |
| Prevalence | 10-24 years | Others | 2014 | 387579.9203 | 596800.5974 | 246238.1868 | 18.4071894169385 |
| Prevalence | 10-24 years | Motorcyclist road injuries | 2015 | 124501.8049 | 149297.6025 | 104029.8901 | 6.04324524883189 |
| Prevalence | 10-24 years | Pedestrian road injuries | 2015 | 136375.6678 | 158752.9418 | 115382.5949 | 6.61959565285488 |
| Prevalence | 10-24 years | Falls | 2015 | 749518.0594 | 882827.9981 | 645940.2869 | 36.3811709799779 |
| Prevalence | 10-24 years | Physical violence by other means | 2015 | 223026.1275 | 261214.6133 | 187839.5852 | 10.8255586050524 |
| Prevalence | 10-24 years | Other transport injuries | 2015 | 48287.79429 | 59593.08776 | 39566.35398 | 2.34386146975139 |
| Prevalence | 10-24 years | Motor vehicle road injuries | 2015 | 225164.2114 | 258852.699 | 193827.0862 | 10.9293399548943 |
| Prevalence | 10-24 years | Cyclist road injuries | 2015 | 97191.22923 | 118597.1115 | 80568.33772 | 4.71760577884063 |
| Prevalence | 10-24 years | Other road injuries | 2015 | 69679.40942 | 87649.27823 | 56289.65213 | 3.38219803525778 |
| Prevalence | 10-24 years | Others | 2015 | 386436.936 | 594379.3024 | 244841.7323 | 18.7574242745388 |
| Prevalence | 10-24 years | Motorcyclist road injuries | 2016 | 121336.0545 | 145450.266 | 101465.0284 | 6.00813324293027 |
| Prevalence | 10-24 years | Pedestrian road injuries | 2016 | 129518.4239 | 150784.8026 | 109810.7372 | 6.41329530131973 |
| Prevalence | 10-24 years | Falls | 2016 | 739424.315 | 870962.7824 | 636973.9586 | 36.6136827663409 |
| Prevalence | 10-24 years | Physical violence by other means | 2016 | 219282.9878 | 256883.6466 | 184888.9049 | 10.8581197405776 |
| Prevalence | 10-24 years | Other transport injuries | 2016 | 48702.08955 | 60213.41636 | 39806.24554 | 2.41155561247891 |
| Prevalence | 10-24 years | Motor vehicle road injuries | 2016 | 218172.9973 | 250835.8242 | 187823.7666 | 10.8031569280001 |
| Prevalence | 10-24 years | Cyclist road injuries | 2016 | 94478.6912 | 115170.3033 | 78322.34069 | 4.67825138773788 |
| Prevalence | 10-24 years | Other road injuries | 2016 | 67855.50544 | 85465.72201 | 54931.50841 | 3.35996517795047 |
| Prevalence | 10-24 years | Others | 2016 | 380758.9556 | 585329.641 | 240505.2636 | 18.8538398426642 |
| Prevalence | 10-24 years | Motorcyclist road injuries | 2017 | 117889.0115 | 141226.1615 | 98675.76768 | 5.91018554658566 |
| Prevalence | 10-24 years | Pedestrian road injuries | 2017 | 122908.2231 | 143026.8489 | 104313.8034 | 6.16181605460443 |
| Prevalence | 10-24 years | Falls | 2017 | 731179.516 | 861210.7598 | 629562.64 | 36.6565683471076 |
| Prevalence | 10-24 years | Physical violence by other means | 2017 | 215785.3435 | 252626.8591 | 182133.9691 | 10.8180686400846 |
| Prevalence | 10-24 years | Other transport injuries | 2017 | 50158.8598 | 62251.52693 | 40844.76293 | 2.5146378313909 |
| Prevalence | 10-24 years | Motor vehicle road injuries | 2017 | 211647.1061 | 243379.0385 | 182432.9045 | 10.6106044281226 |
| Prevalence | 10-24 years | Cyclist road injuries | 2017 | 92064.13577 | 112108.8551 | 76297.59572 | 4.61549484267882 |
| Prevalence | 10-24 years | Other road injuries | 2017 | 66022.58892 | 83250.1697 | 53561.14143 | 3.30994166307986 |
| Prevalence | 10-24 years | Others | 2017 | 387020.519 | 595684.4379 | 243737.6734 | 19.4026826463455 |
| Prevalence | 10-24 years | Motorcyclist road injuries | 2018 | 114962.0154 | 137483.2096 | 96334.51921 | 5.82061846358238 |
| Prevalence | 10-24 years | Pedestrian road injuries | 2018 | 117735.1524 | 136914.919 | 99899.90384 | 5.96102460006217 |
| Prevalence | 10-24 years | Falls | 2018 | 727186.1636 | 856448.0487 | 625649.5061 | 36.8180150250897 |
| Prevalence | 10-24 years | Physical violence by other means | 2018 | 213560.2673 | 249928.2757 | 180406.1489 | 10.8127265393607 |
| Prevalence | 10-24 years | Other transport injuries | 2018 | 51852.19604 | 64657.41792 | 42089.76434 | 2.62531801132392 |
| Prevalence | 10-24 years | Motor vehicle road injuries | 2018 | 206767.4537 | 237746.5706 | 178099.9197 | 10.4688009729702 |
| Prevalence | 10-24 years | Cyclist road injuries | 2018 | 90240.03115 | 109761.8552 | 74773.41032 | 4.56892469776534 |
| Prevalence | 10-24 years | Other road injuries | 2018 | 64590.23106 | 81444.8866 | 52493.73702 | 3.2702548765067 |
| Prevalence | 10-24 years | Others | 2018 | 388188.9676 | 600510.9815 | 243985.4241 | 19.6543168133389 |
| Prevalence | 10-24 years | Motorcyclist road injuries | 2019 | 113397.295 | 135472.3036 | 95041.034 | 5.76125028994833 |
| Prevalence | 10-24 years | Pedestrian road injuries | 2019 | 115247.8604 | 133856.2269 | 97751.82468 | 5.85526990873482 |
| Prevalence | 10-24 years | Falls | 2019 | 729874.1023 | 859633.1502 | 627118.6265 | 37.08190203 |
| Prevalence | 10-24 years | Physical violence by other means | 2019 | 213684.7196 | 249886.6139 | 180602.1997 | 10.8564419702695 |
| Prevalence | 10-24 years | Other transport injuries | 2019 | 52977.8159 | 66341.98415 | 42905.34885 | 2.6915849907593 |
| Prevalence | 10-24 years | Motor vehicle road injuries | 2019 | 204751.2887 | 235258.2124 | 176240.5683 | 10.4025710788795 |
| Prevalence | 10-24 years | Cyclist road injuries | 2019 | 89332.81084 | 108599.325 | 74061.73302 | 4.538632799 |
| Prevalence | 10-24 years | Other road injuries | 2019 | 63967.48109 | 80664.82778 | 52050.15846 | 3.24992469156365 |
| Prevalence | 10-24 years | Others | 2019 | 385042.4221 | 595349.246 | 242043.8852 | 19.5624222426649 |
| Prevalence | 10-24 years | Motorcyclist road injuries | 2020 | 113558.5553 | 135622.1197 | 95041.67466 | 5.7226929874387 |
| Prevalence | 10-24 years | Pedestrian road injuries | 2020 | 115562.8298 | 134310.7062 | 98011.29693 | 5.8236968052114 |
| Prevalence | 10-24 years | Falls | 2020 | 746845.4337 | 880810.2962 | 640426.8906 | 37.6366810483332 |
| Prevalence | 10-24 years | Physical violence by other means | 2020 | 218078.3712 | 254708.7341 | 184519.9734 | 10.9898858987888 |
| Prevalence | 10-24 years | Other transport injuries | 2020 | 53401.44283 | 66839.86503 | 43232.93264 | 2.69112319714717 |
| Prevalence | 10-24 years | Motor vehicle road injuries | 2020 | 205702.0086 | 236121.1614 | 177352.4985 | 10.3661889587043 |
| Prevalence | 10-24 years | Cyclist road injuries | 2020 | 89382.75731 | 108712.7448 | 74140.44417 | 4.50437289471111 |
| Prevalence | 10-24 years | Other road injuries | 2020 | 64313.57899 | 81209.0475 | 52354.96048 | 3.24103161149636 |
| Prevalence | 10-24 years | Others | 2020 | 377510.2122 | 583282.5092 | 237679.1288 | 19.024326598169 |
| Prevalence | 10-24 years | Motorcyclist road injuries | 2021 | 112926.414 | 135021.8121 | 94817.80169 | 5.68684424967789 |
| Prevalence | 10-24 years | Pedestrian road injuries | 2021 | 115936.6028 | 134016.1493 | 98142.06673 | 5.83843389342346 |
| Prevalence | 10-24 years | Falls | 2021 | 748897.2161 | 884842.2482 | 642440.6547 | 37.7136019477079 |
| Prevalence | 10-24 years | Physical violence by other means | 2021 | 218127.8088 | 254805.9574 | 184783.6377 | 10.9846654226452 |
| Prevalence | 10-24 years | Other transport injuries | 2021 | 53623.62518 | 67080.60293 | 43469.39067 | 2.70042405226616 |
| Prevalence | 10-24 years | Motor vehicle road injuries | 2021 | 206778.9007 | 237131.0643 | 178343.7035 | 10.413147471419 |
| Prevalence | 10-24 years | Cyclist road injuries | 2021 | 89463.8163 | 108758.1783 | 74413.44187 | 4.50529483102062 |
| Prevalence | 10-24 years | Other road injuries | 2021 | 64771.7816 | 81722.98936 | 52757.02796 | 3.26183237991912 |
| Prevalence | 10-24 years | Others | 2021 | 375222.1519 | 577920.0897 | 236084.1657 | 18.8957557519207 |
